# Supplementary material for: Profiling of conditionally reprogrammed cell lines for in vitro chemotherapy response prediction of pancreatic cancer
Source: PubMed Central journal article supplement — eBioMedicine. 2021 Feb 25;65:103218. doi: 10.1016/j.ebiom.2021.103218 (PMC7921470; doi:10.1016/j.ebiom.2021.103218), 2021-02-25
Supplement: mmc2.pdf [file mmc2.pdf]

Supplementary Figure 1

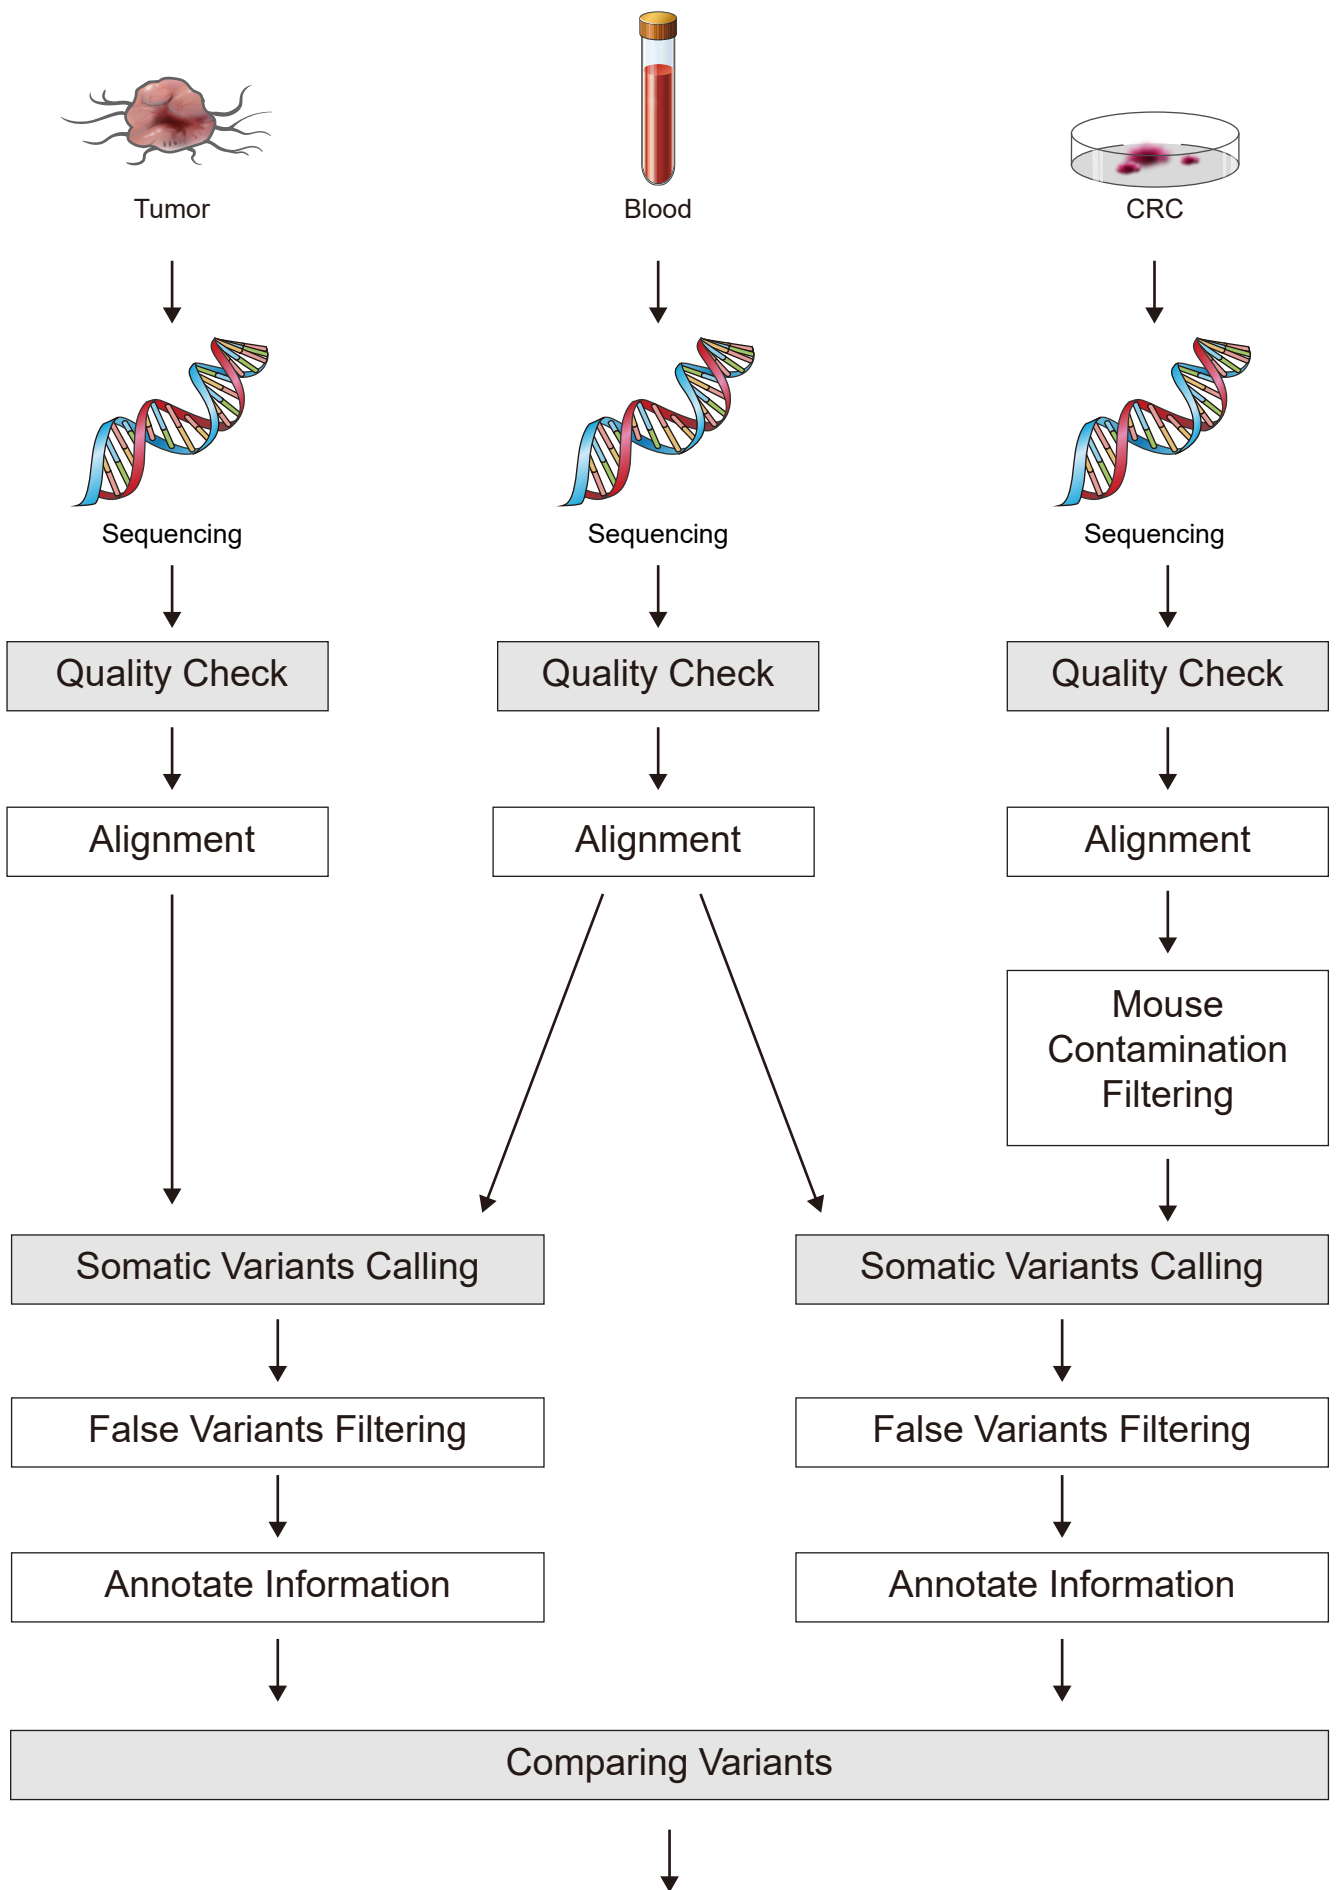

***Evaluate the features and feasibility of the CRC method on NGS level***



# YPAC - IF

## **a-Amylase**

(santa cruz sc-25562, rabbit polyclonal)  
Dilution 1:100, resolution rate 200X

## **Cytokeratin 19**

( A53-B/A2 : santa cruz sc-6278, mouse monoclonal)  
Dilution 1:100, resolution rate 200X

## **Vimentin**

(D21H3 : #5741, Cell signaling technology, mouse monoclonal) Dilution 1:100, resolution rate 200X

## **Insulin**

(santa cruz sc-8033, mouse monoclonal) Dilution 1:100, resolution rate 200X

# YPAC-2

**a-Amylase**

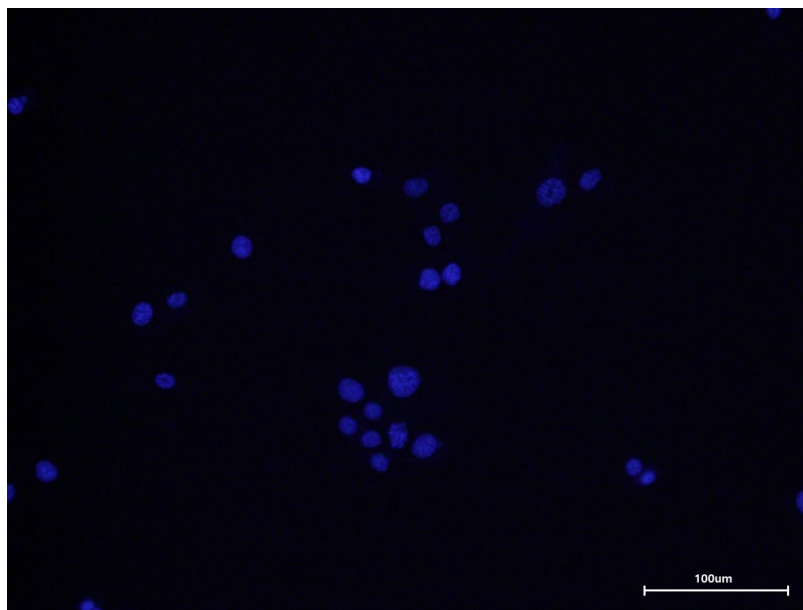

**Cytokeratin 19**

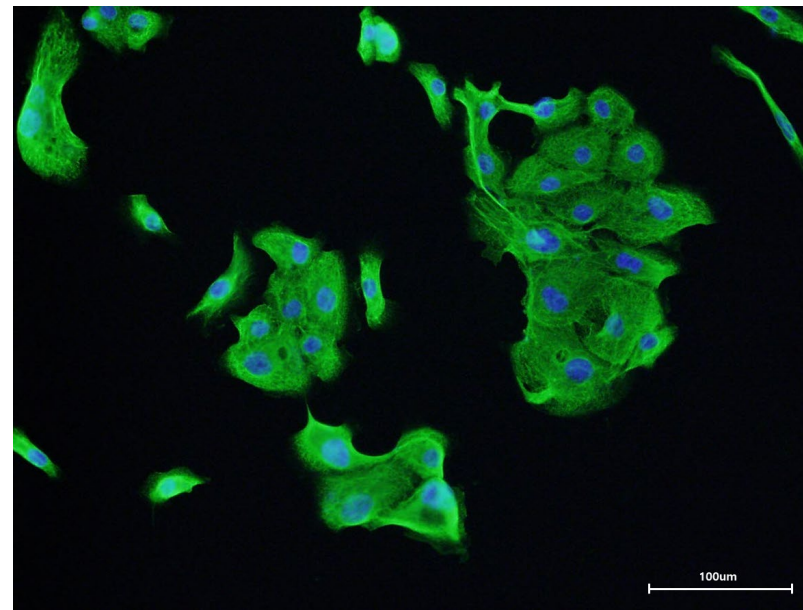

**Insulin**

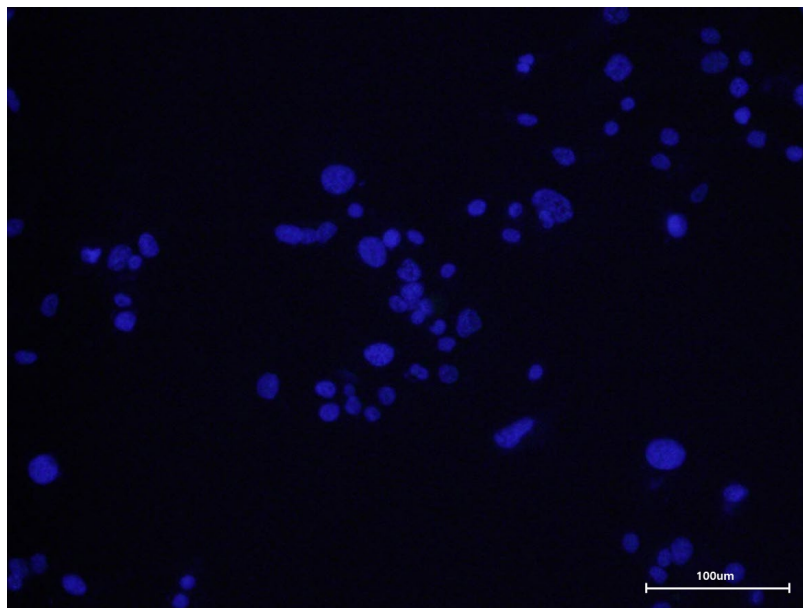

**Vimentin**

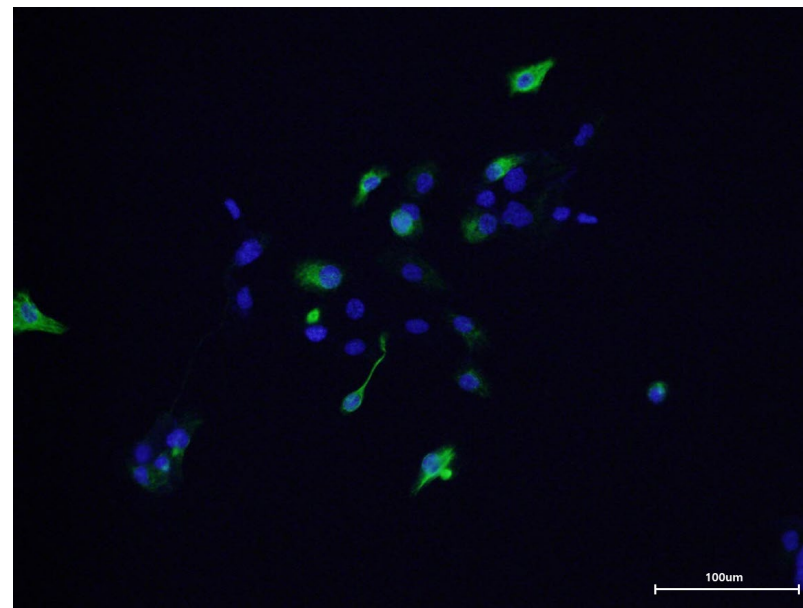

YPAC-5

**a-Amylase**

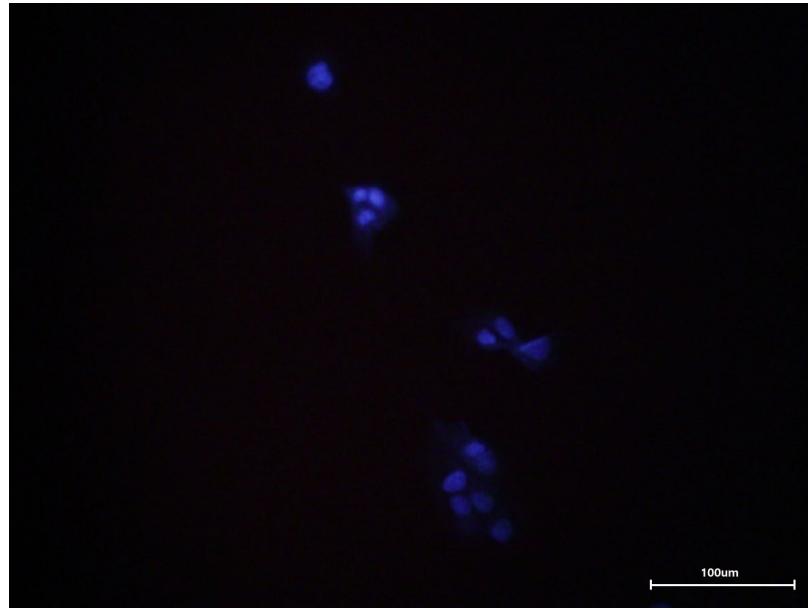

**Cytokeratin 19**

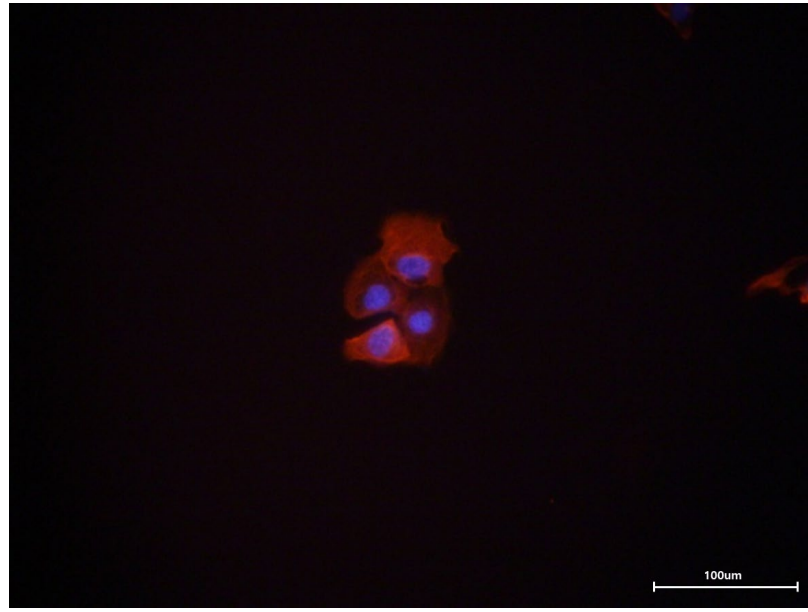

**Insulin**

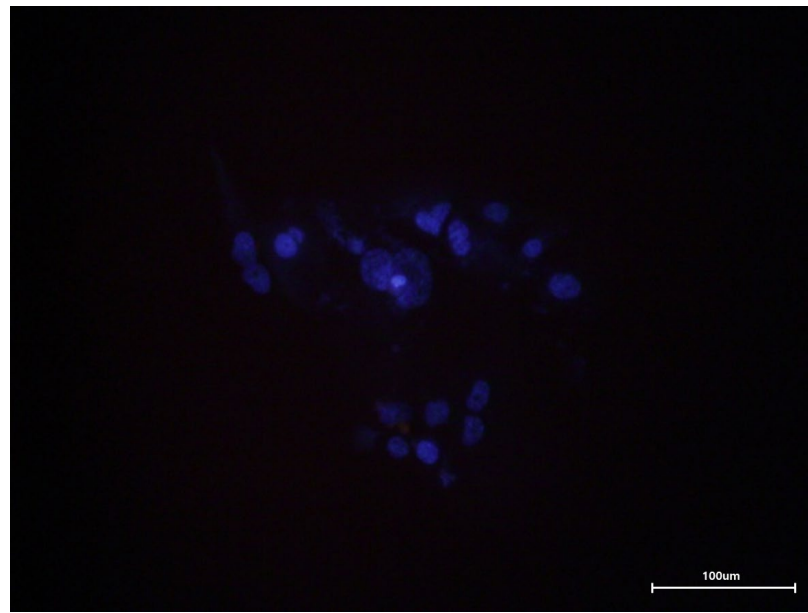

**Vimentin**

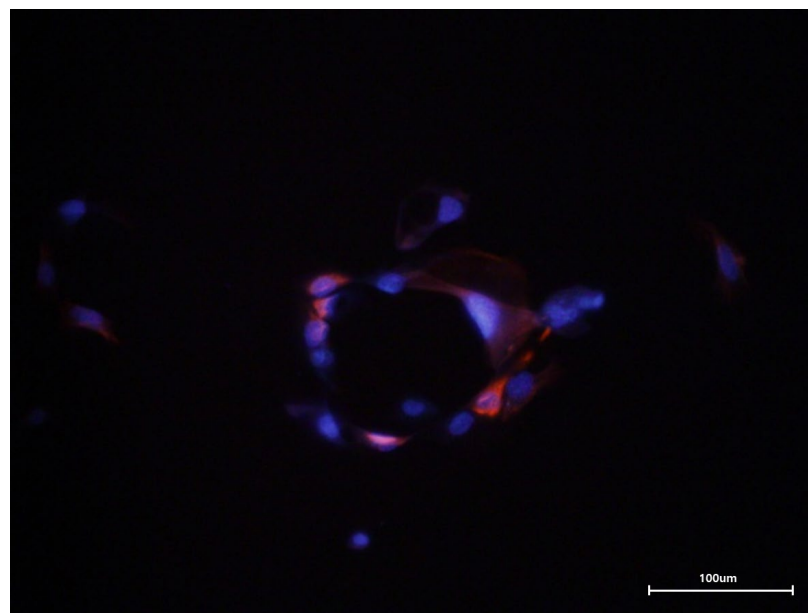

# YPAC-6

**a-Amylase**

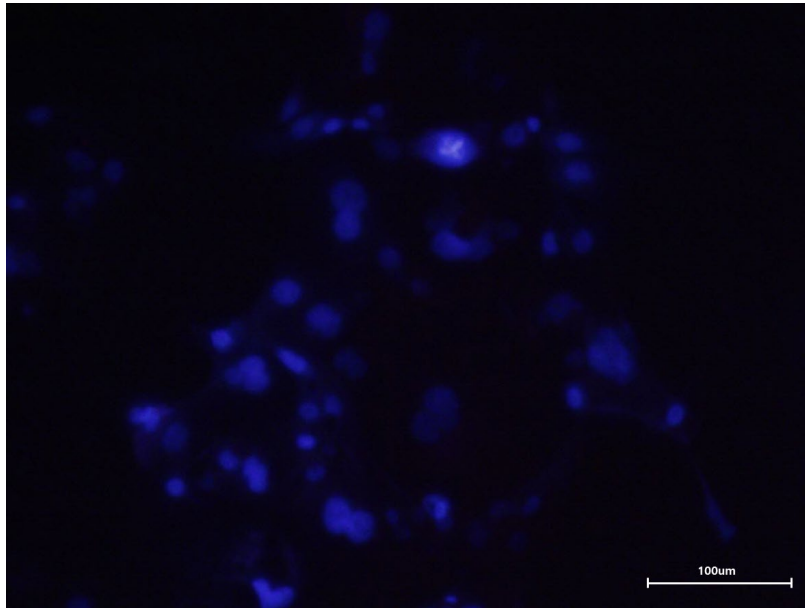

**Cytokeratin 19**

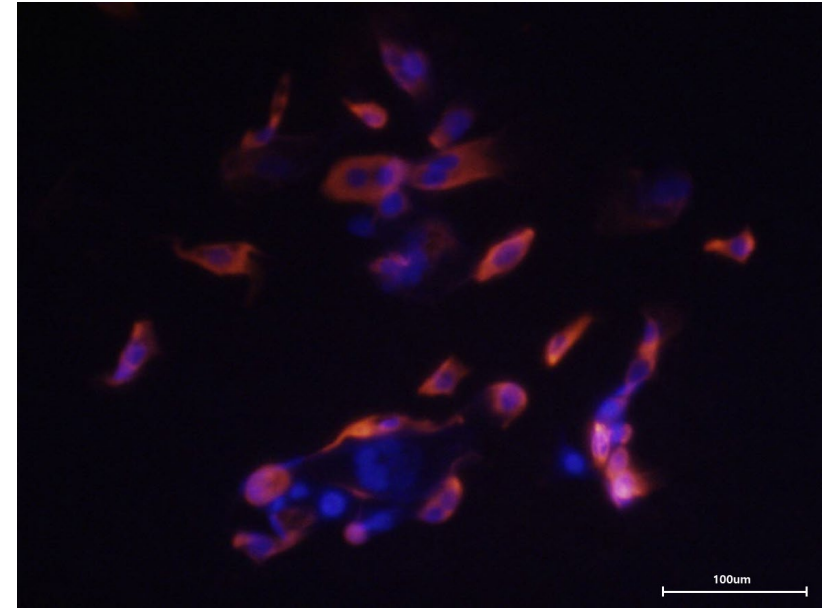

**Insulin**

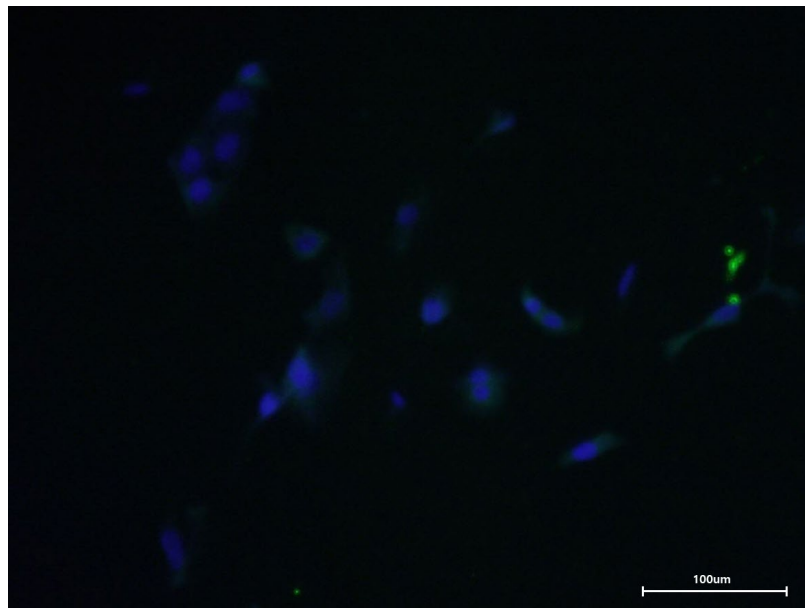

**Vimentin**

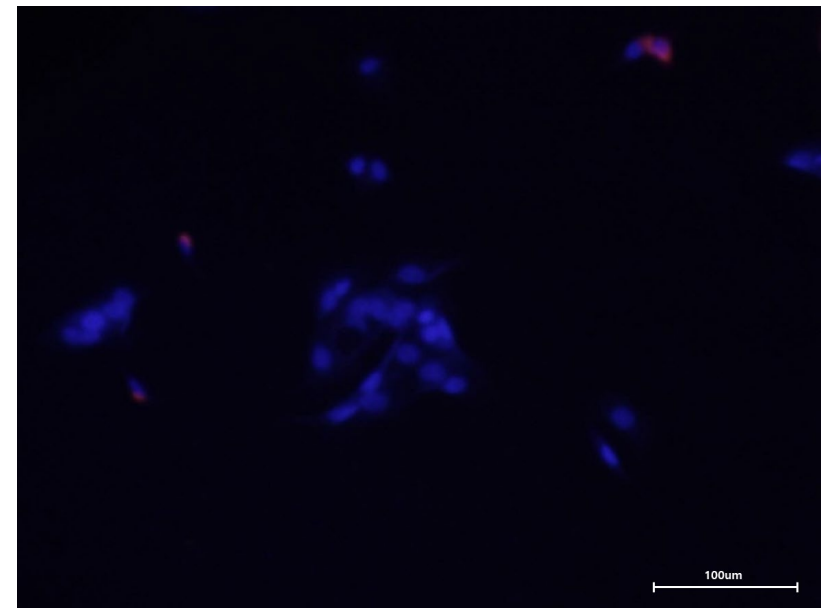

# YPAC-7

**a-Amylase**

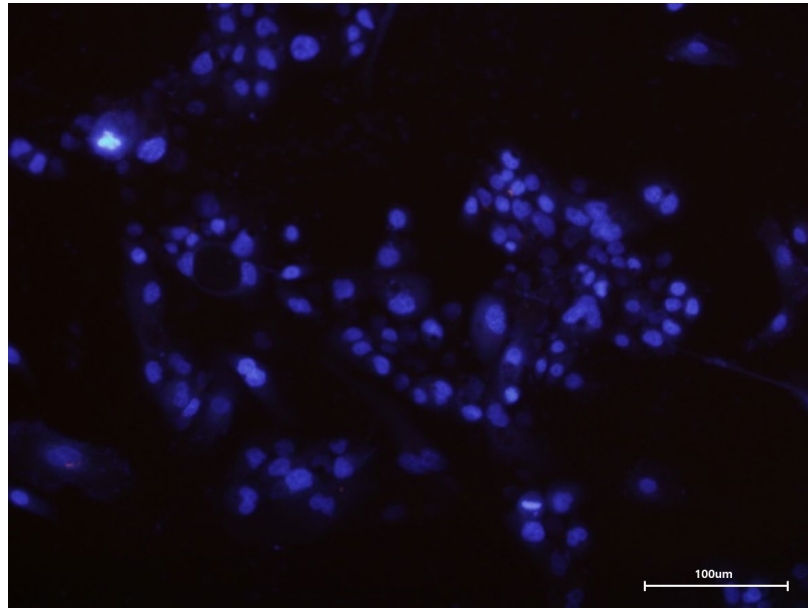

**Cytokeratin 19**

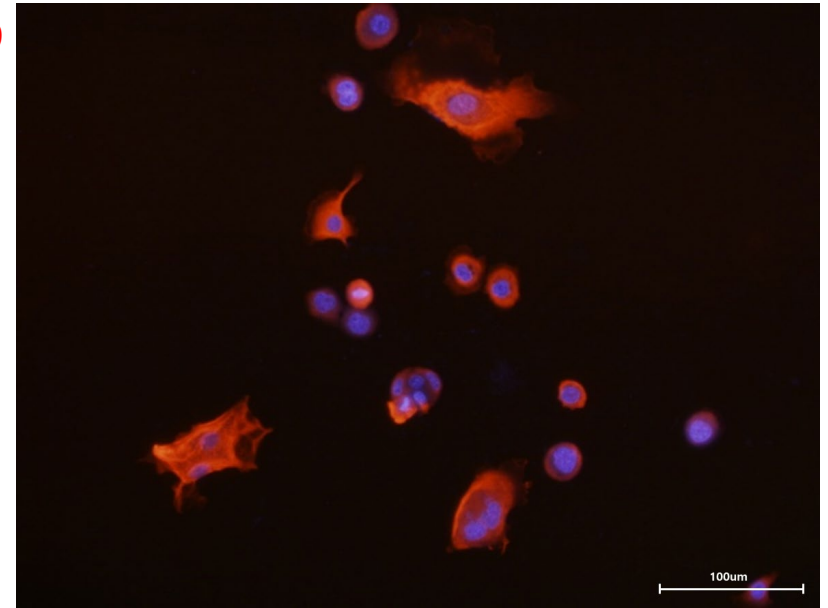

**Insulin**

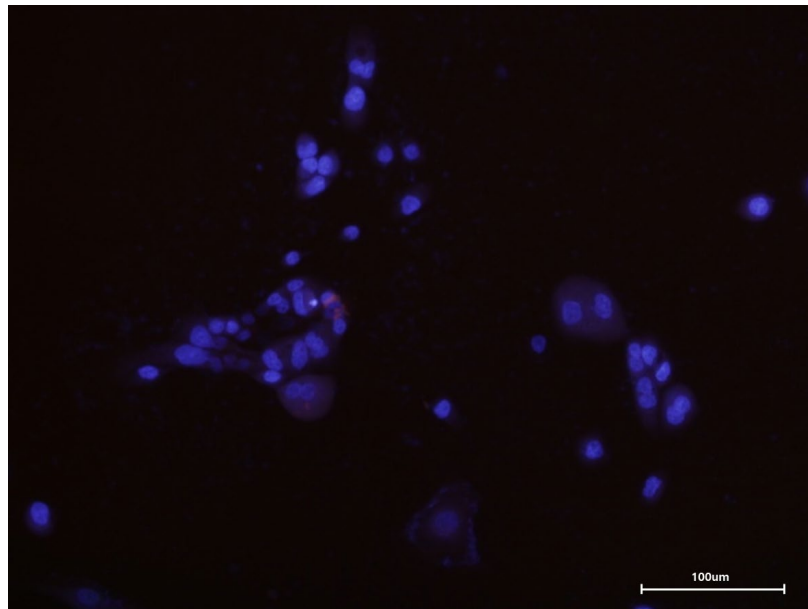

**Vimentin**

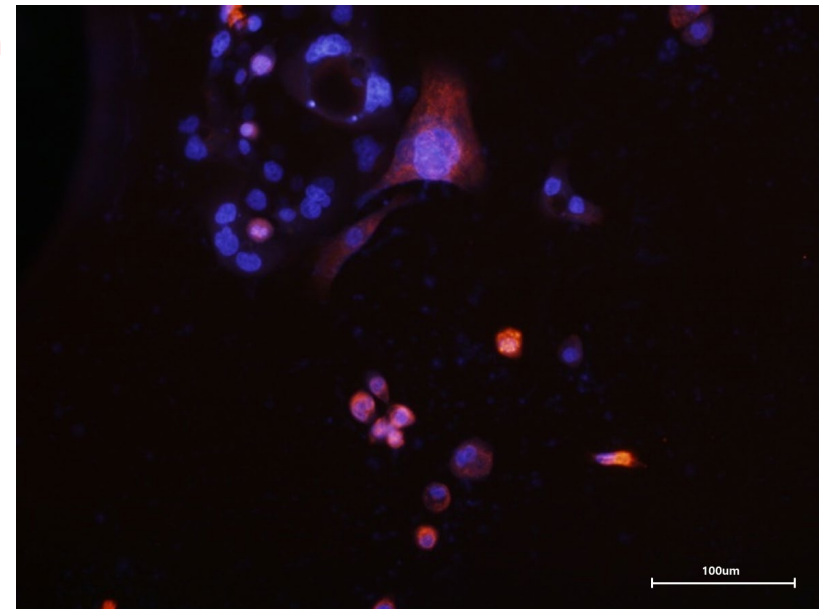

# YPAC-10

**a-Amylase**

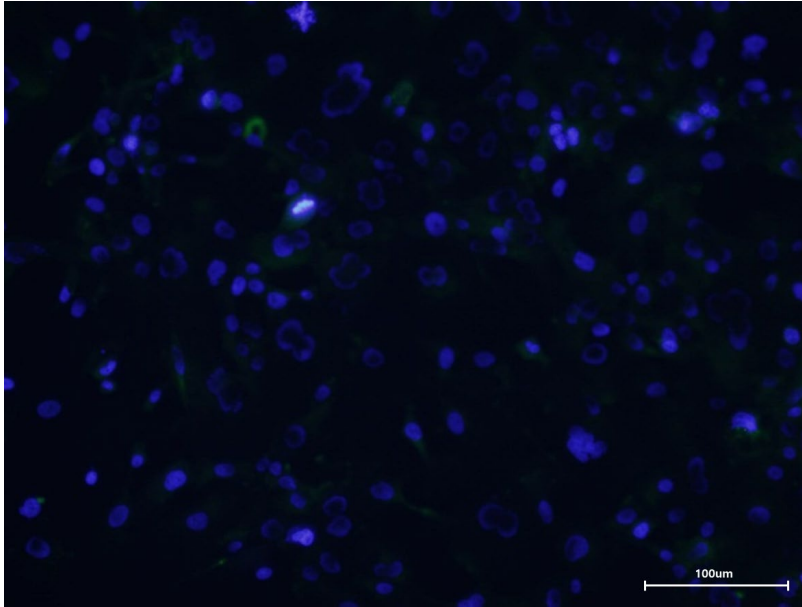

**Cytokeratin 19**

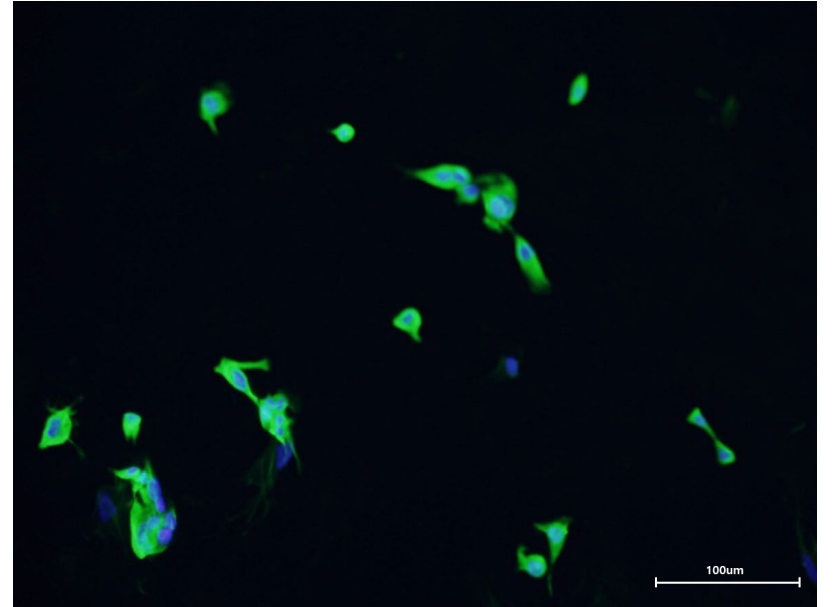

**Insulin**

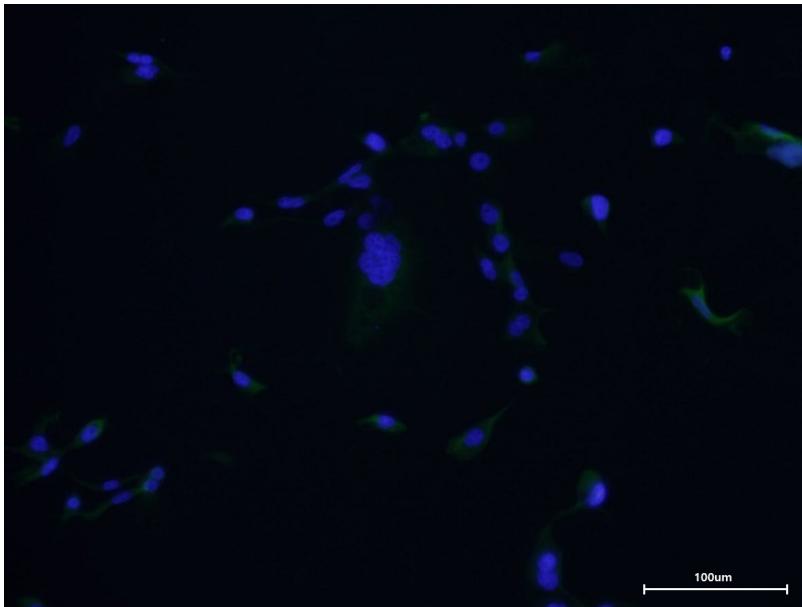

**Vimentin**

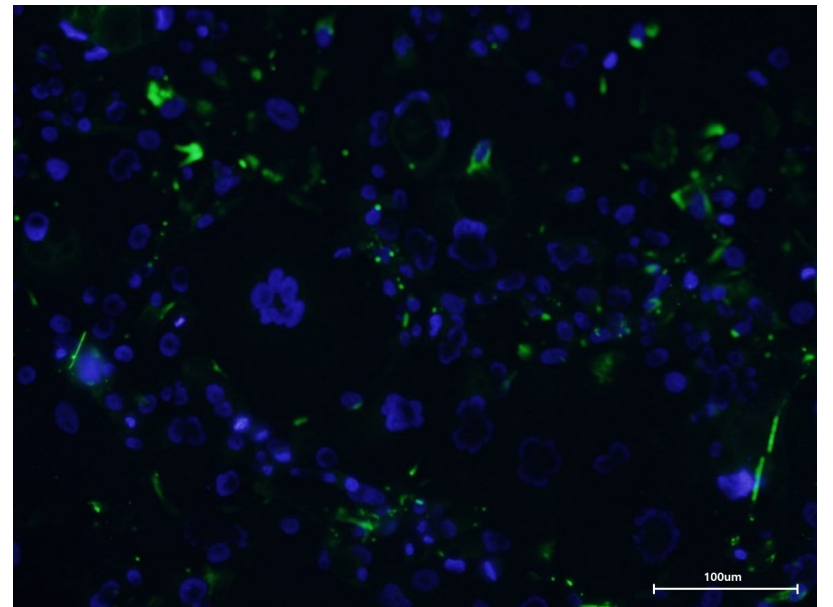



YPAC-13

**a-Amylase**

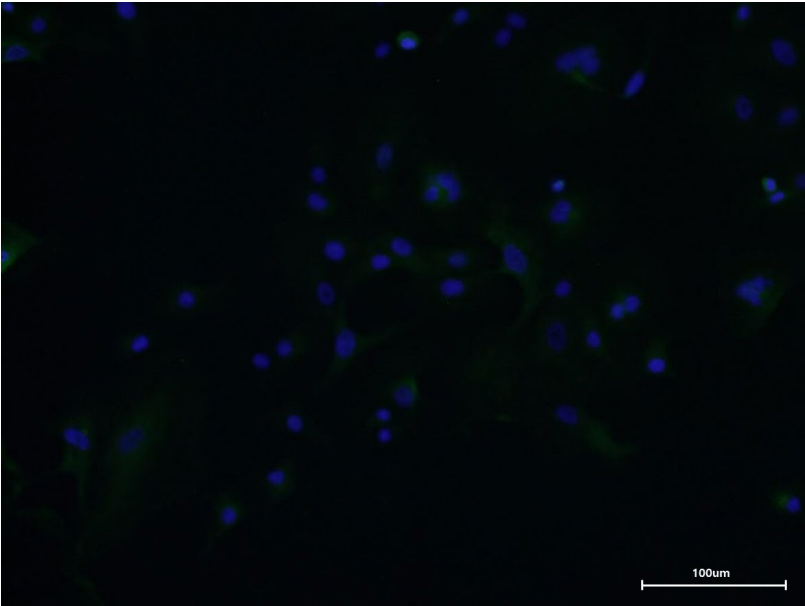

**Cytokeratin 19**

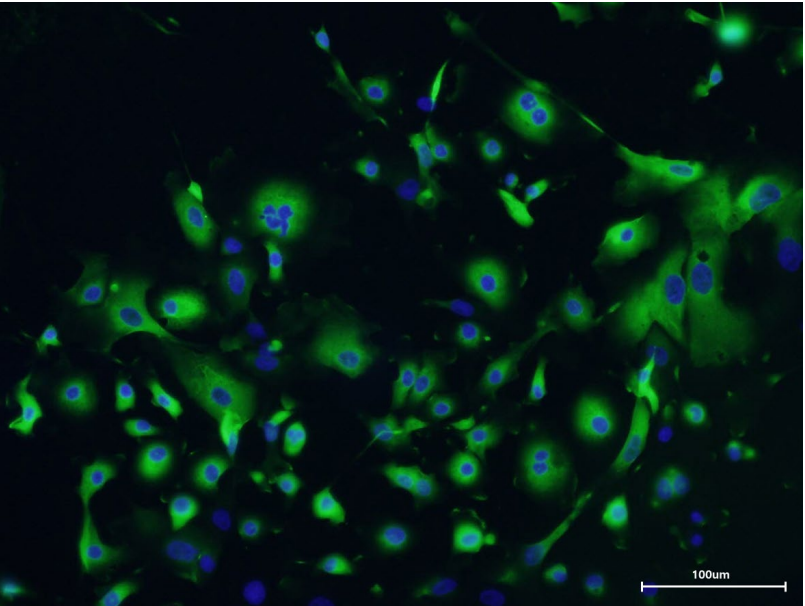

**Insulin**

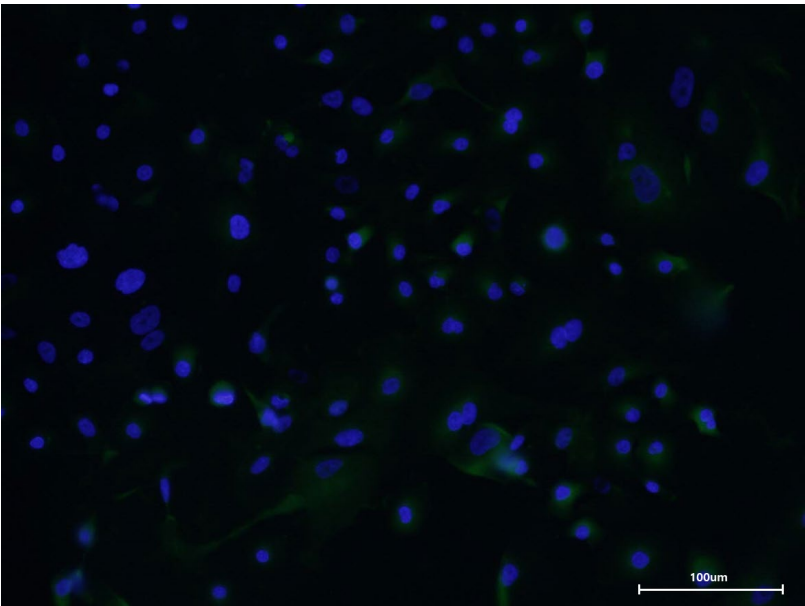

**Vimentin**

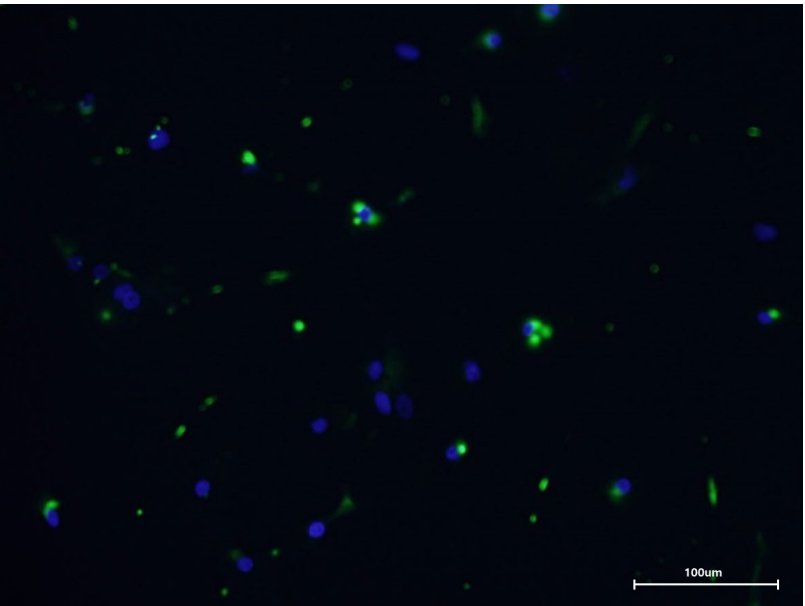

# YPAC-15

**a-Amylase**

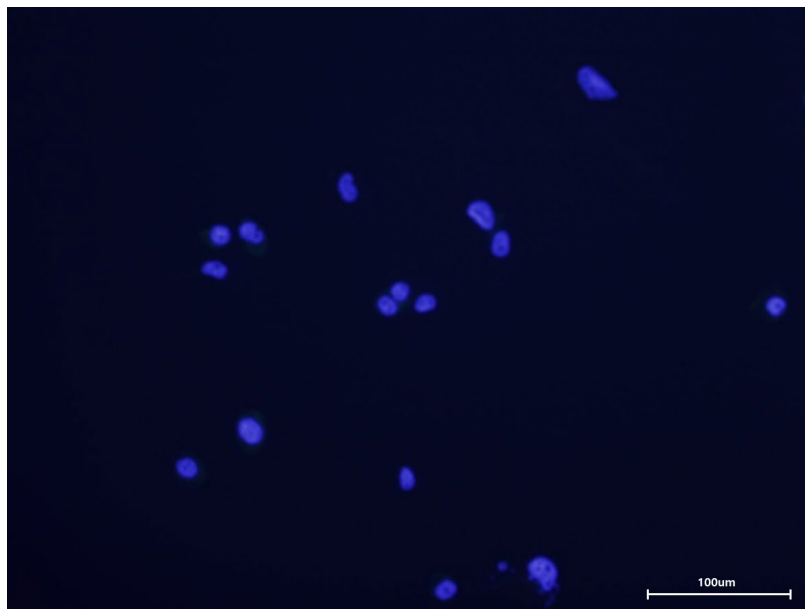

**Cytokeratin 19**

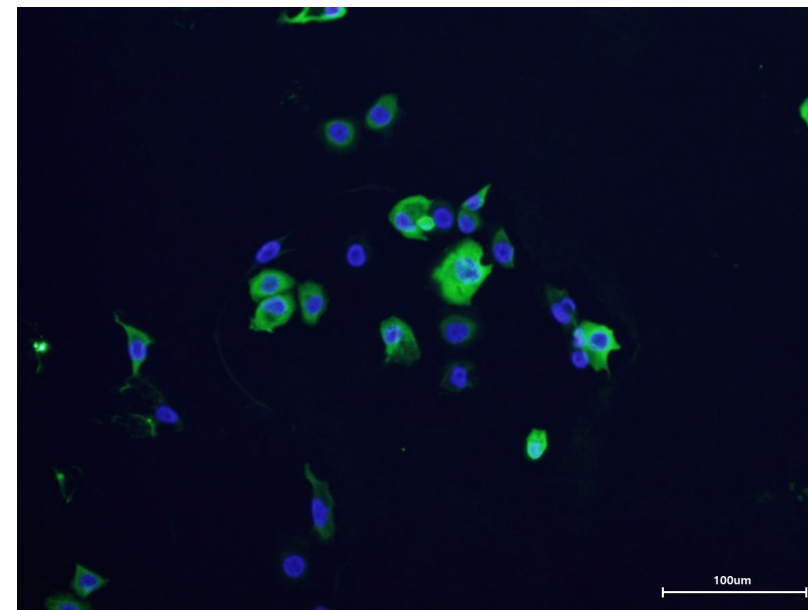

**Insulin**

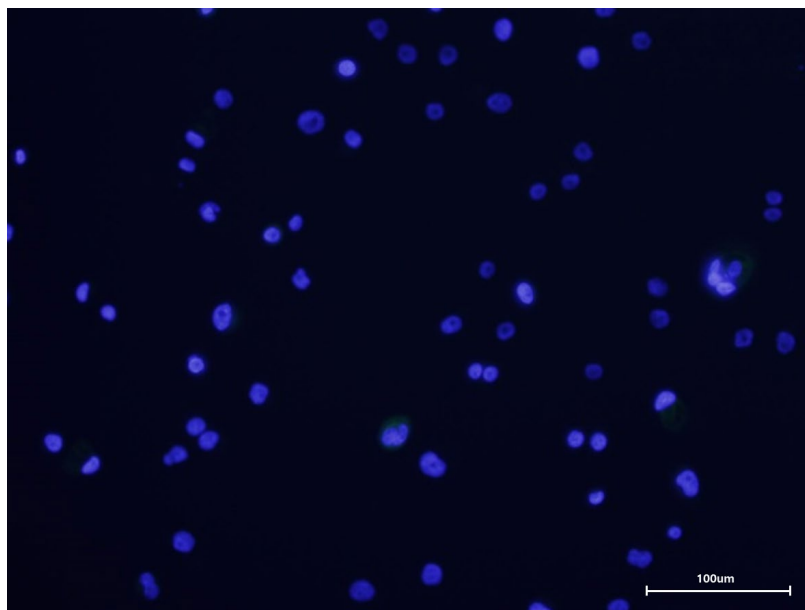

**Vimentin**

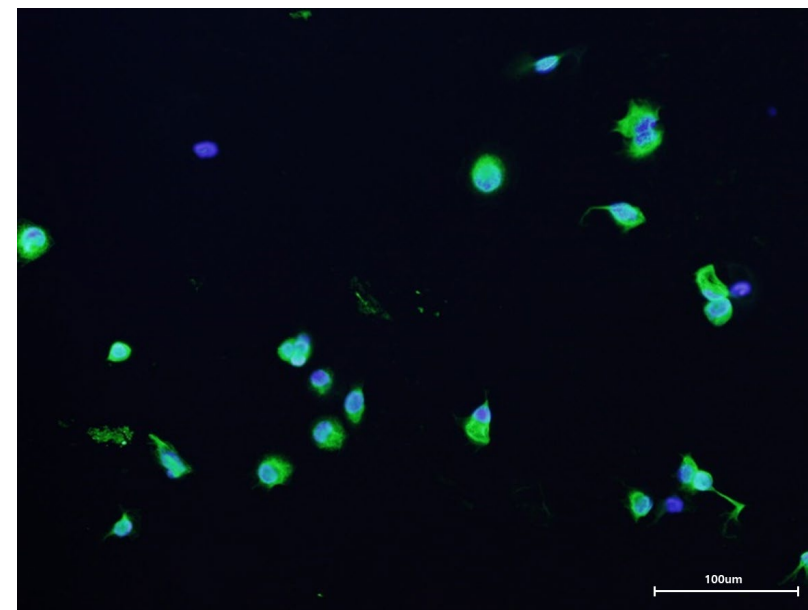

**YPAC-16**

**a-Amylase**

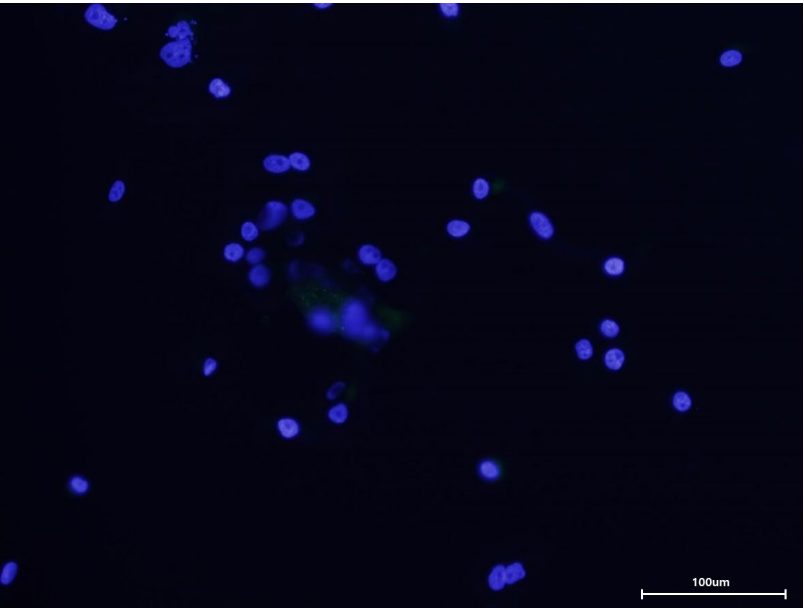

**Cytokeratin 19**

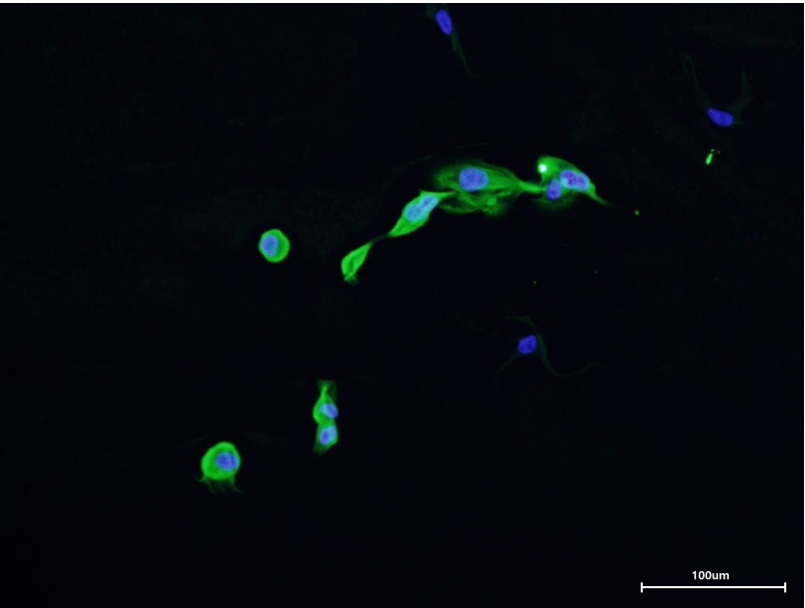

**Insulin**

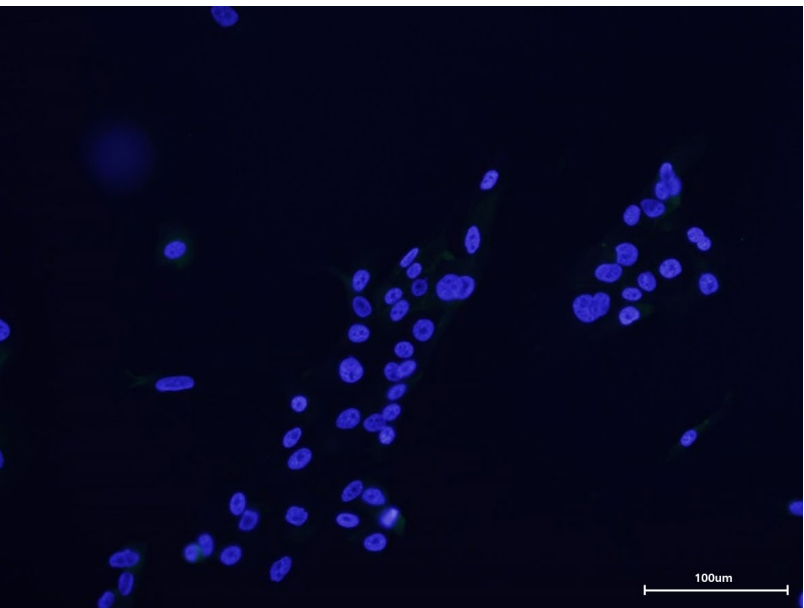

**Vimentin**

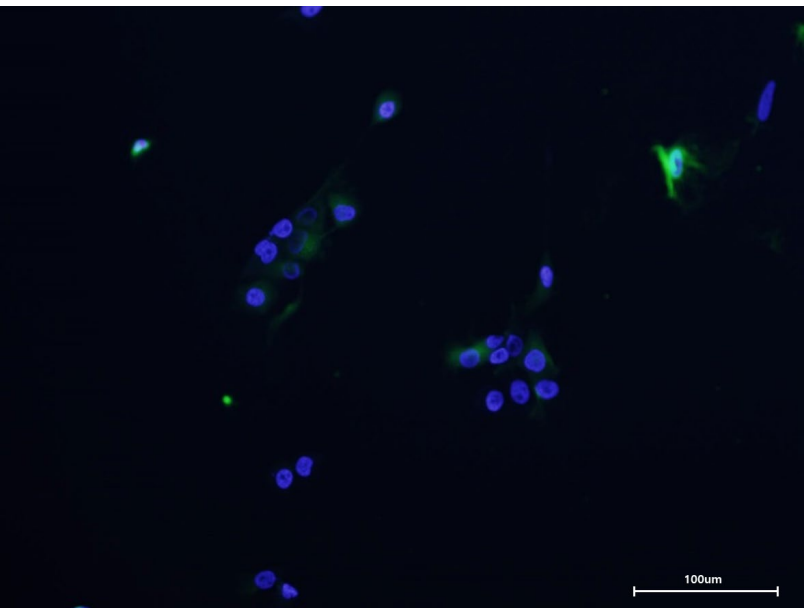

# YPAC-17

**a-Amylase**

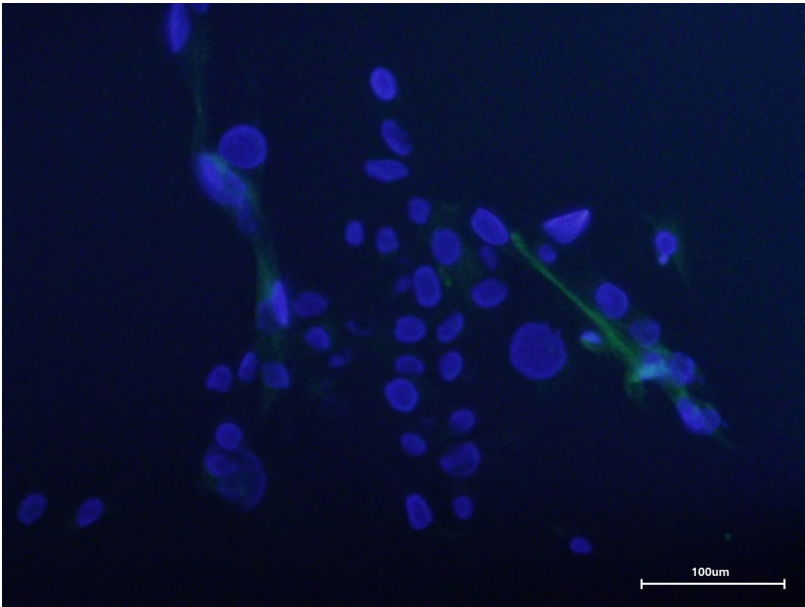

**Cytokeratin 19**

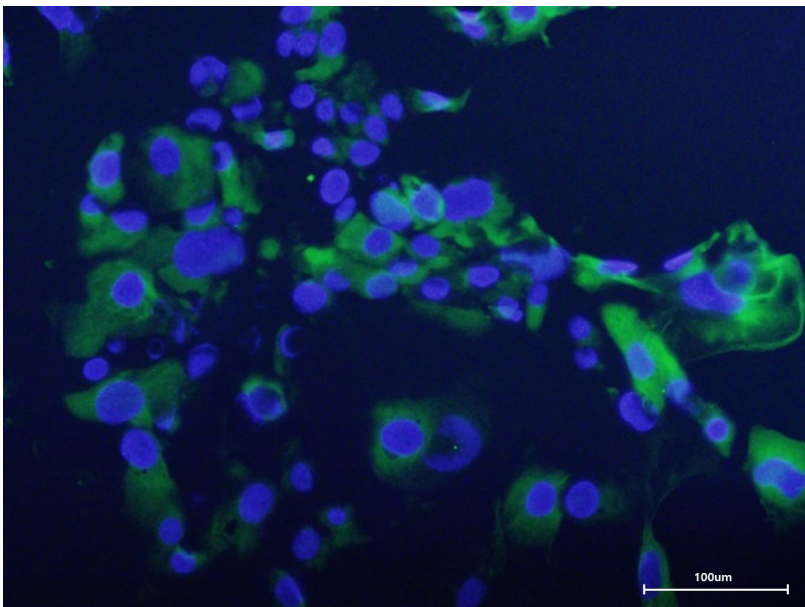

**Insulin**

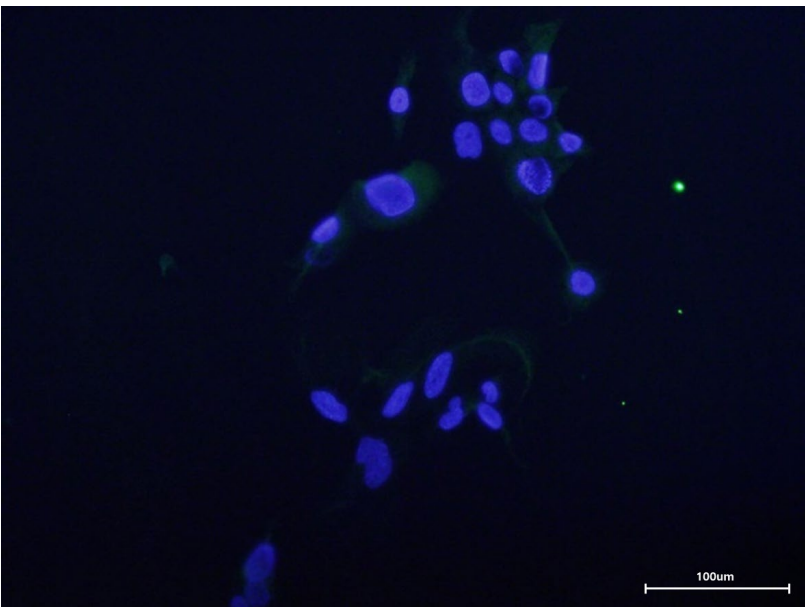

**Vimentin**

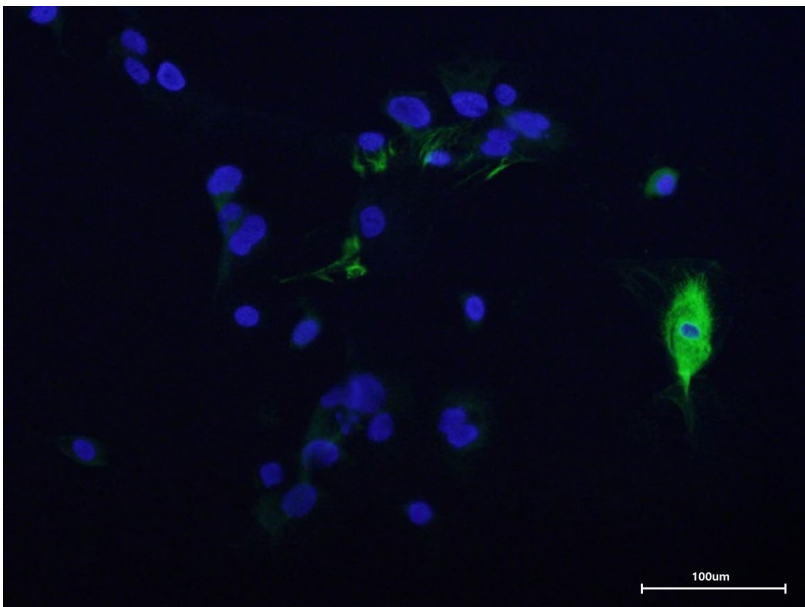

YPAC-20

**a-Amylase**

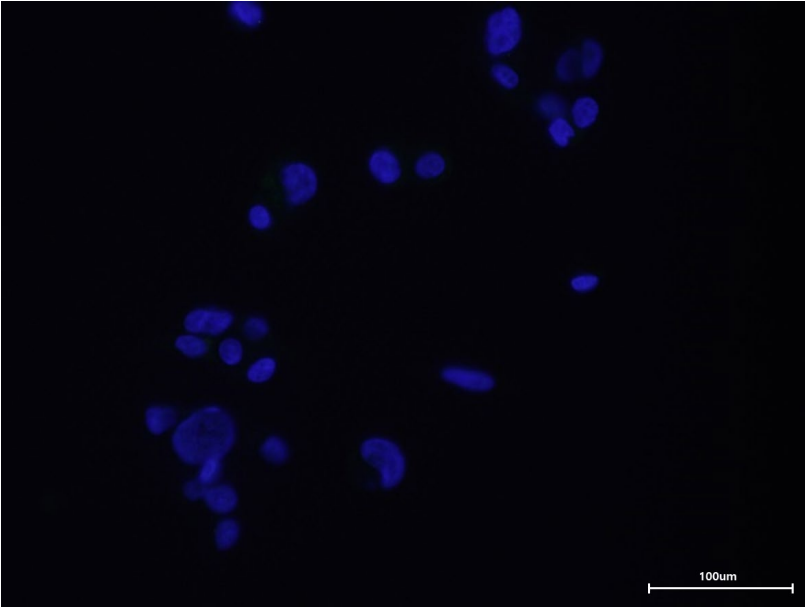

**Cytokeratin 19**

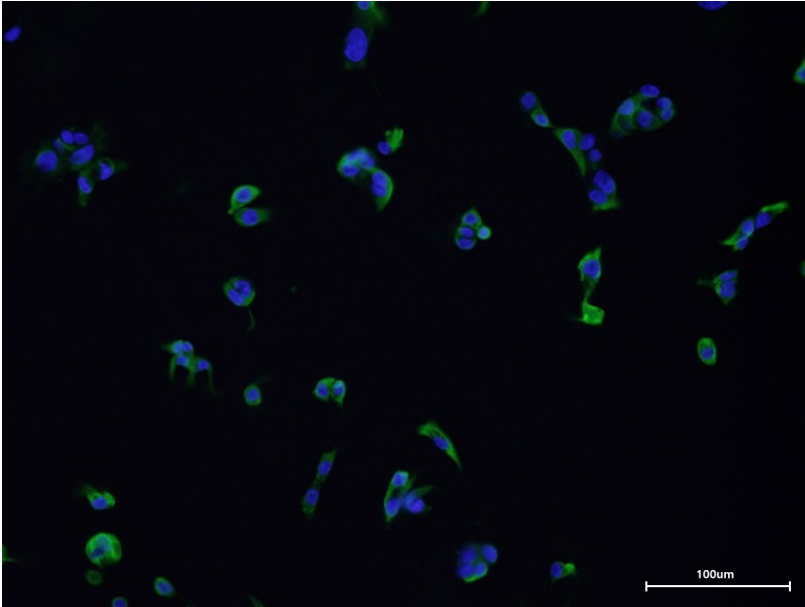

**Insulin**

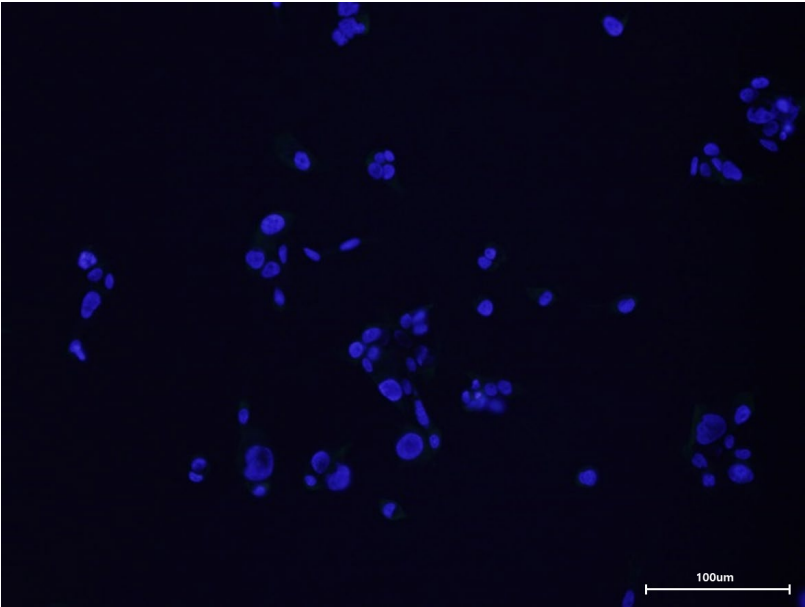

**Vimentin**

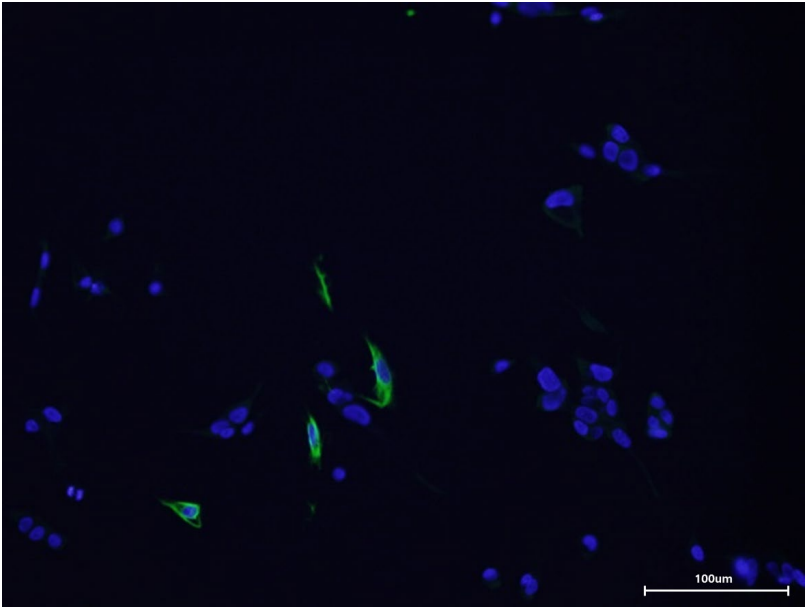

# YPAC-21

**a-Amylase**

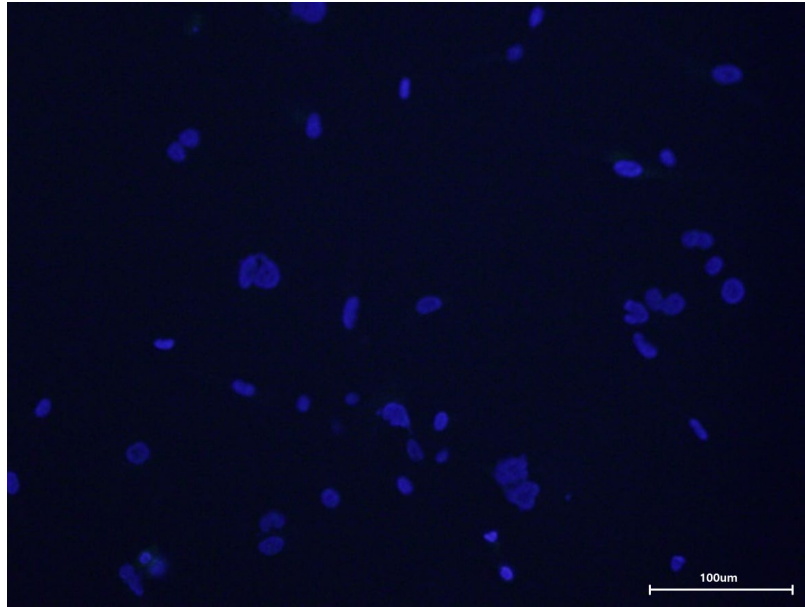

**Cytokeratin 19**

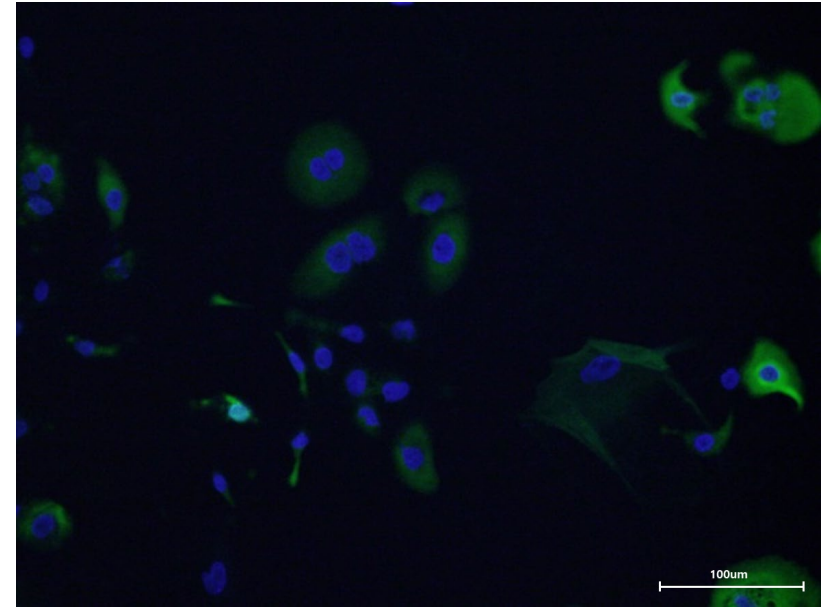

**Insulin**

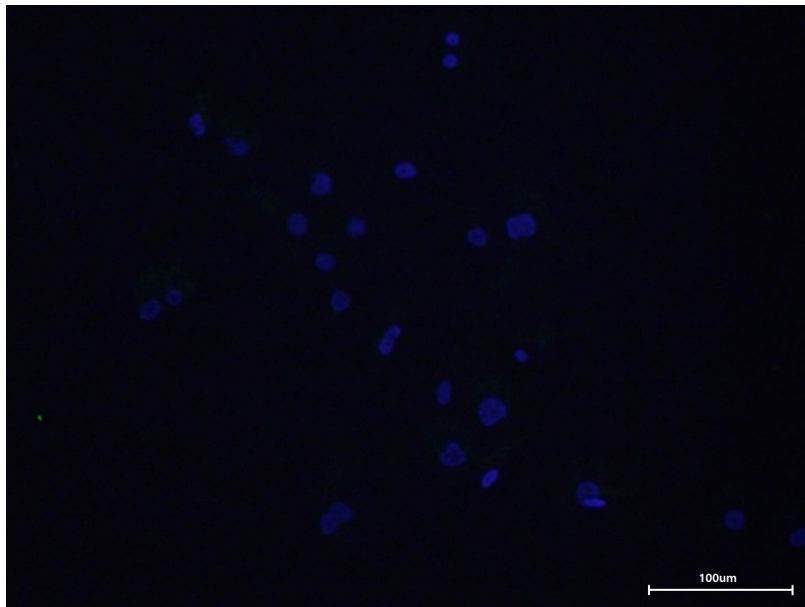

**Vimentin**

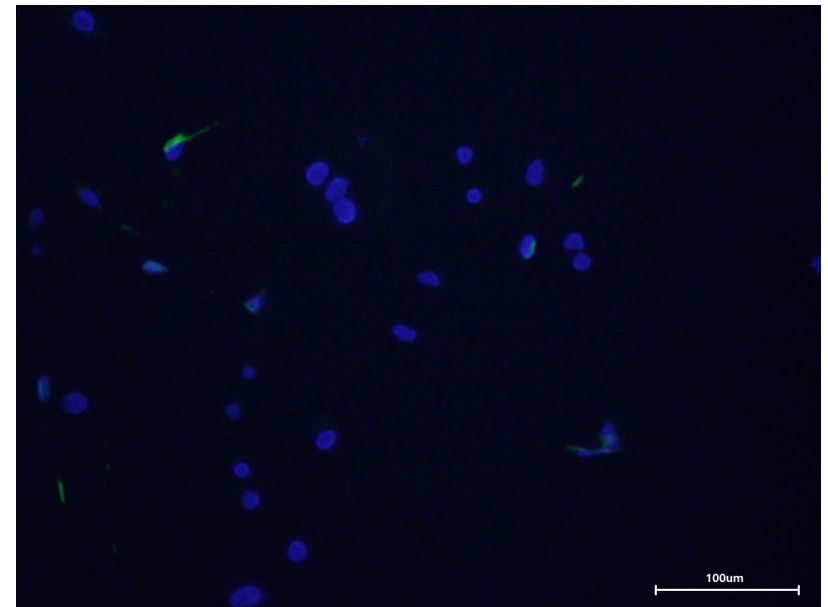

YPAC-23

**a-Amylase**

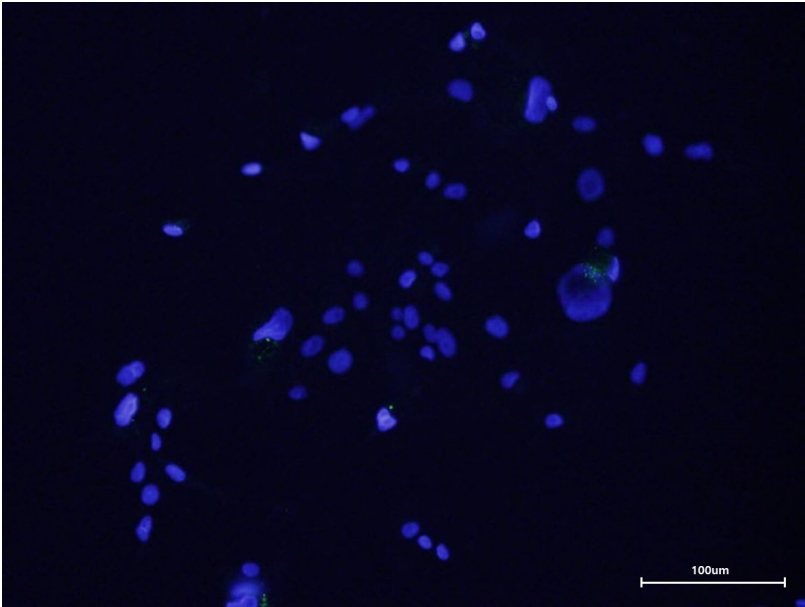

**Cytokeratin 19**

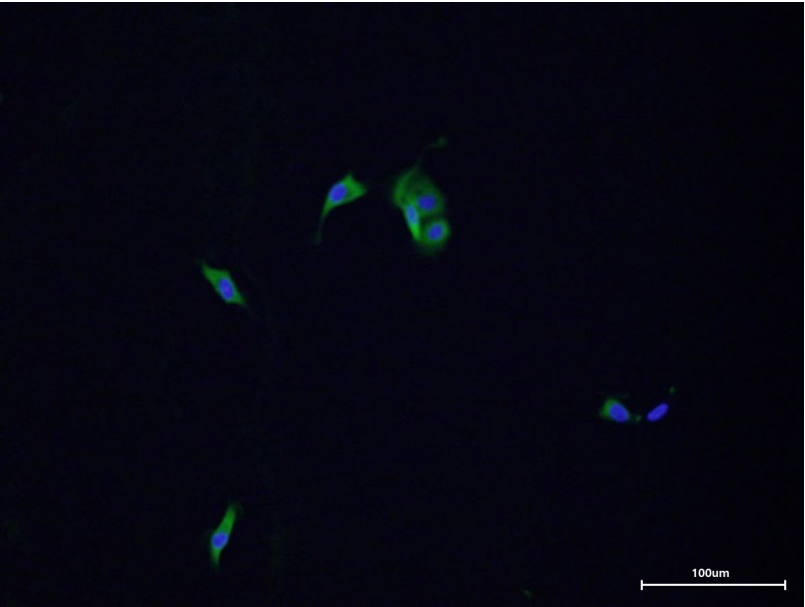

**Insulin**

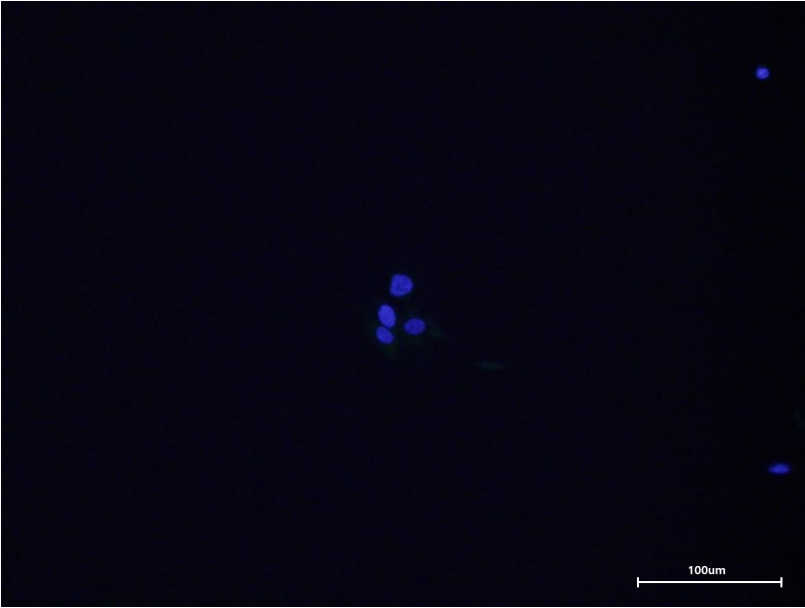

**Vimentin**

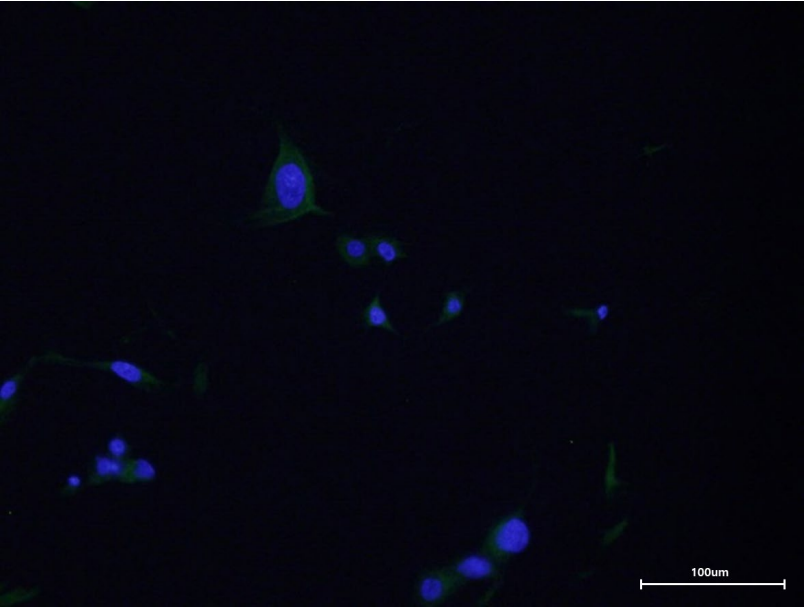

# YPAC-25

**a-Amylase**

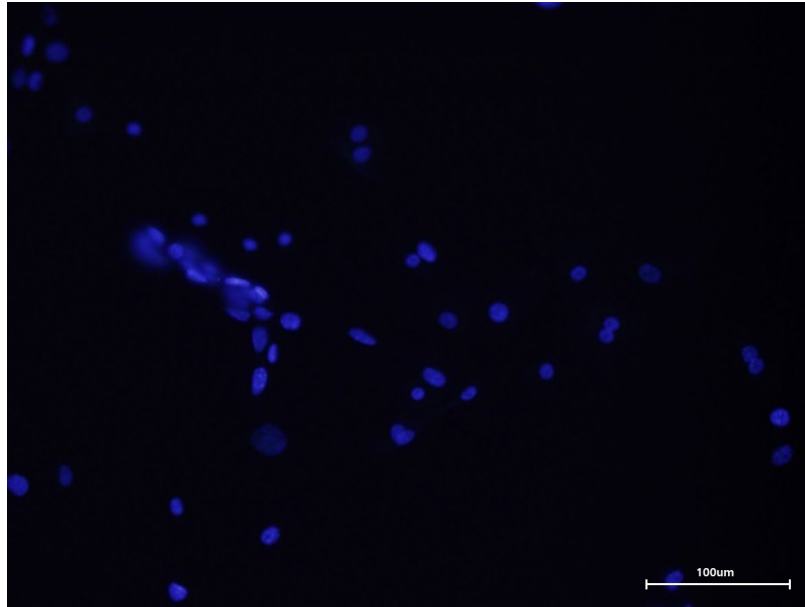

**Cytokeratin 19**

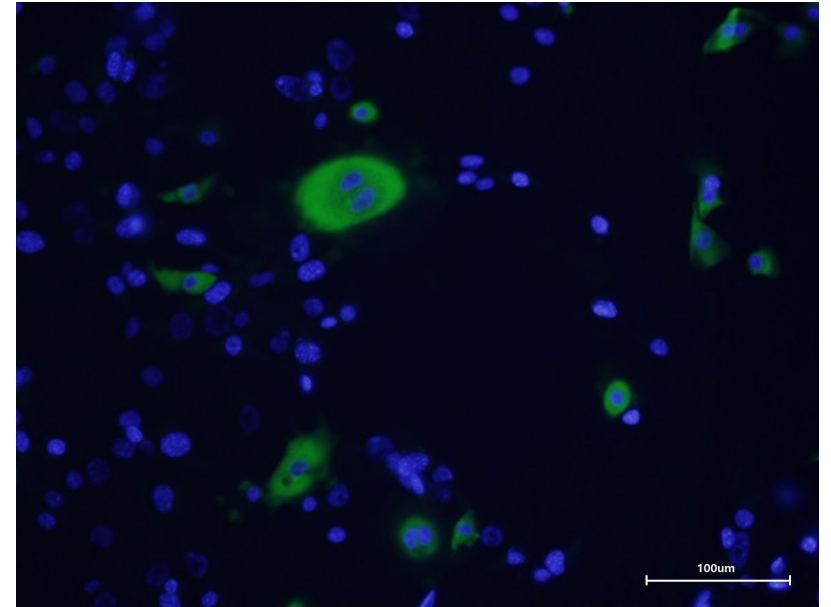

**Insulin**

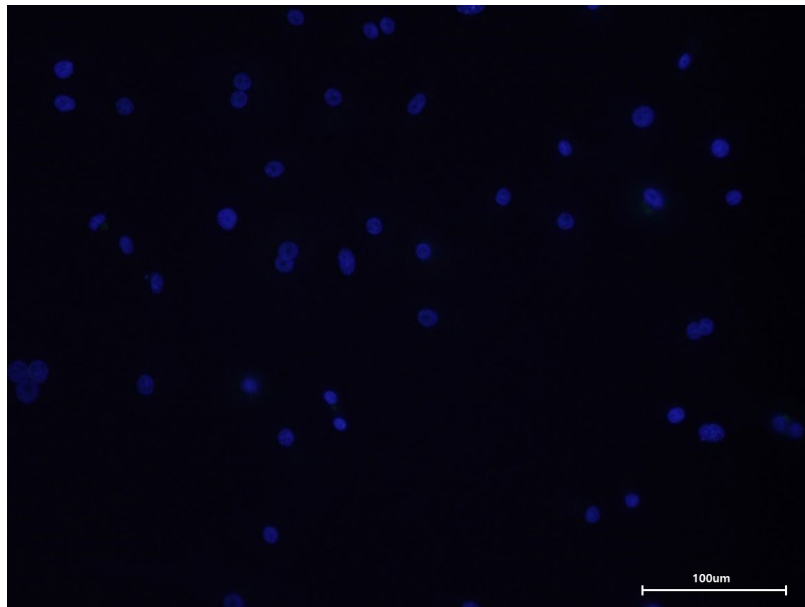

**Vimentin**

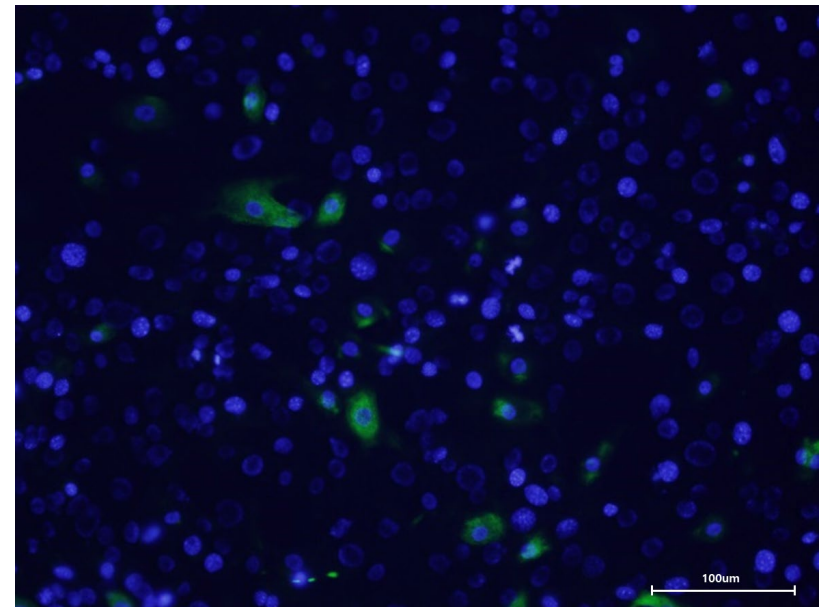



**YPAC-26**

**a-Amylase**

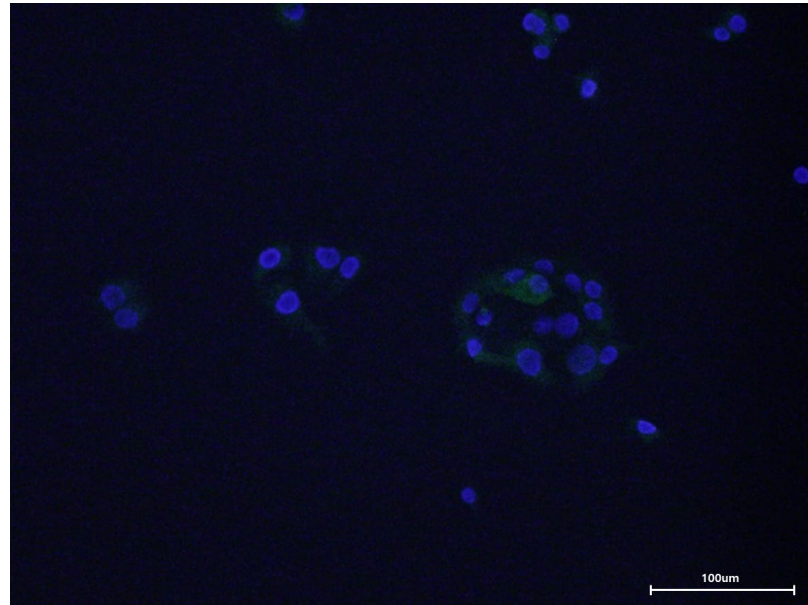

**Cytokeratin 19**

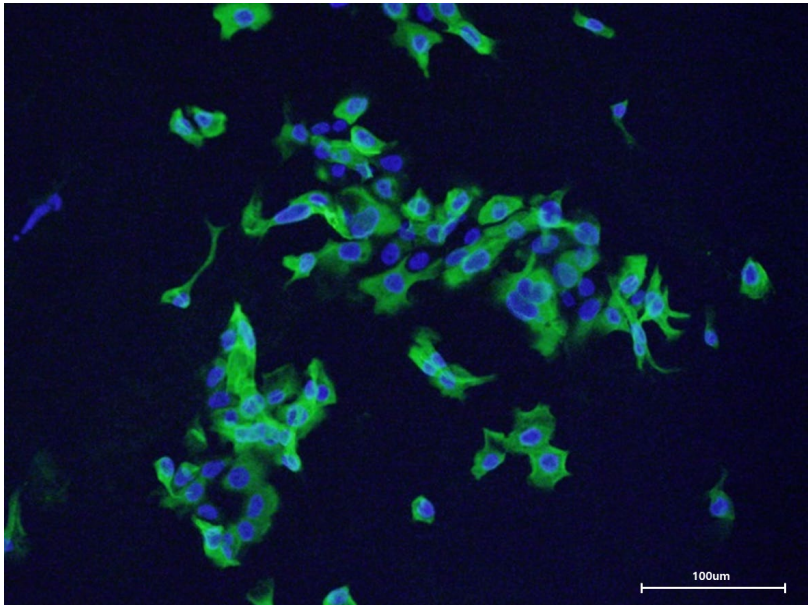

**Insulin**

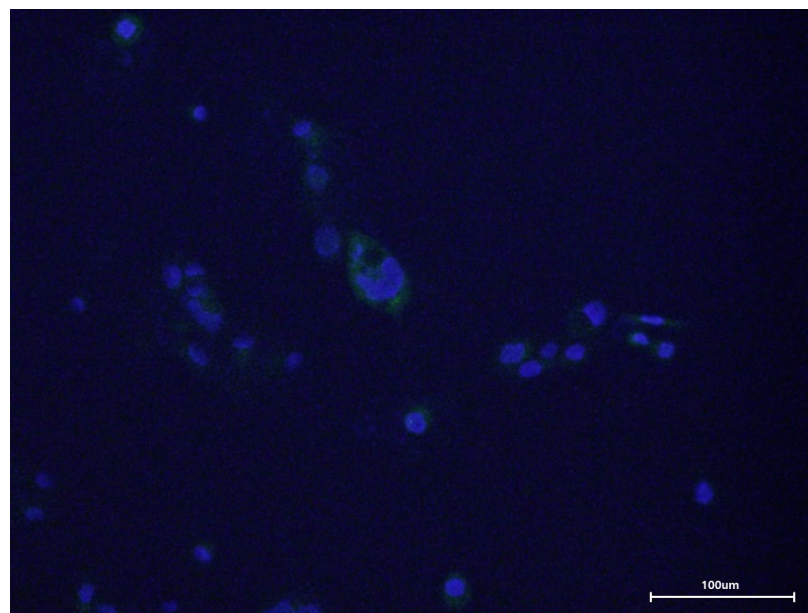

**Vimentin**

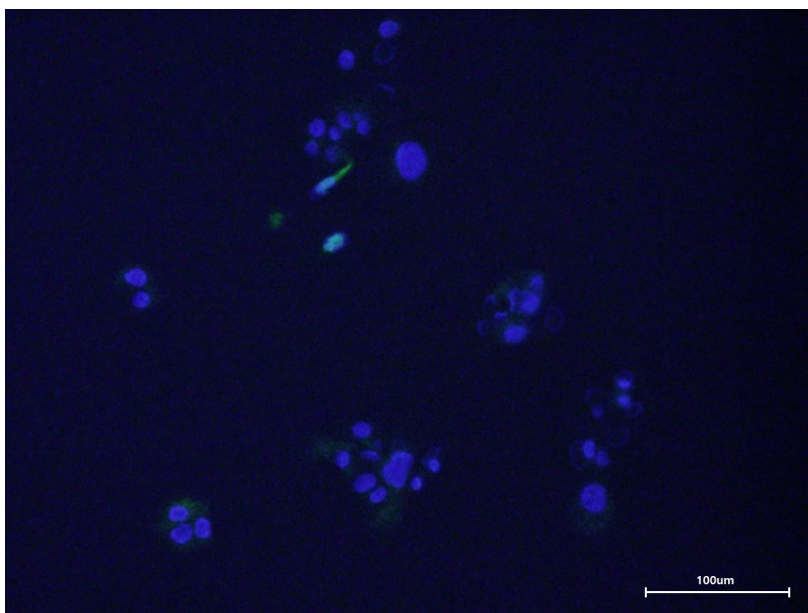

# YPAC-27

**a-Amylase**

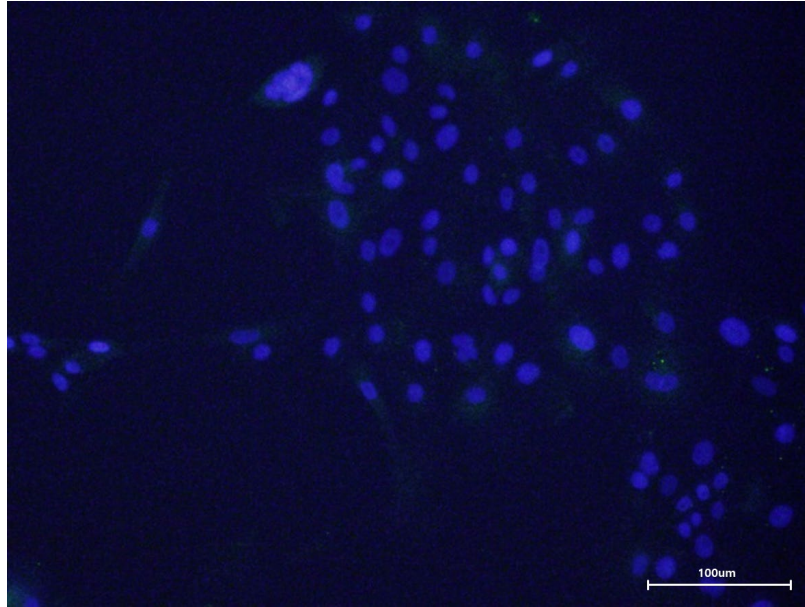

**Cytokeratin 19**

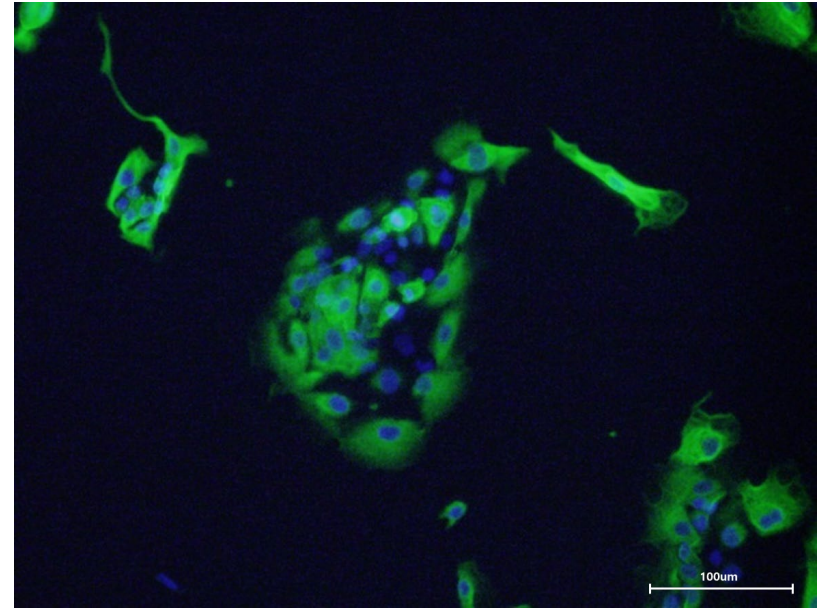

**Insulin**

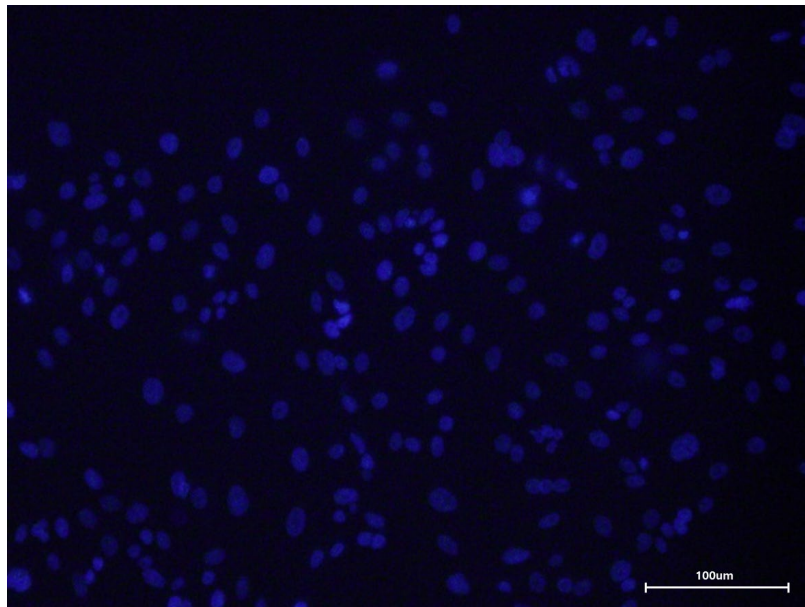

**Vimentin**

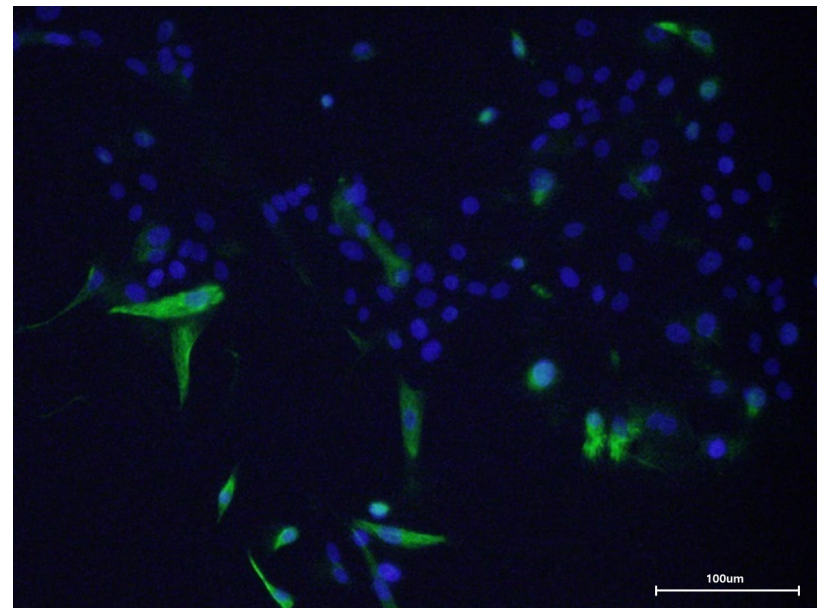

# YPAC-28

**a-Amylase**

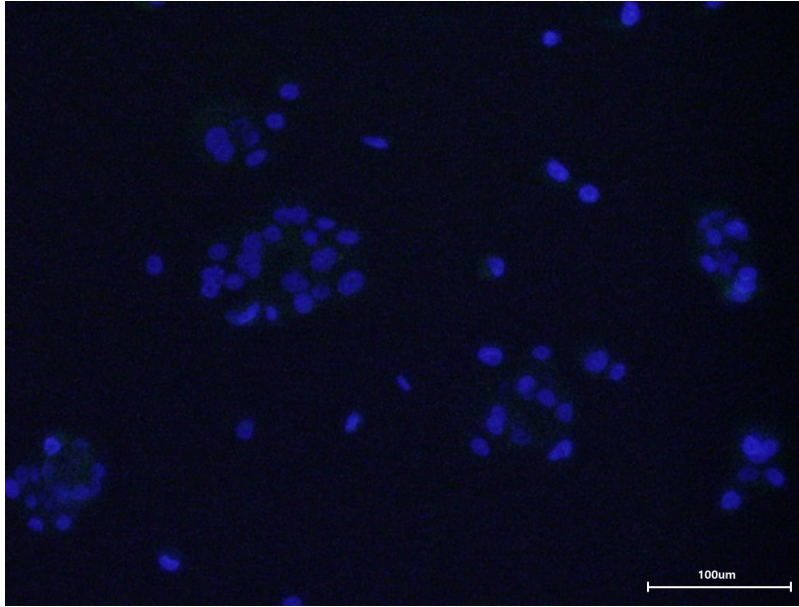

**Cytokeratin 19**

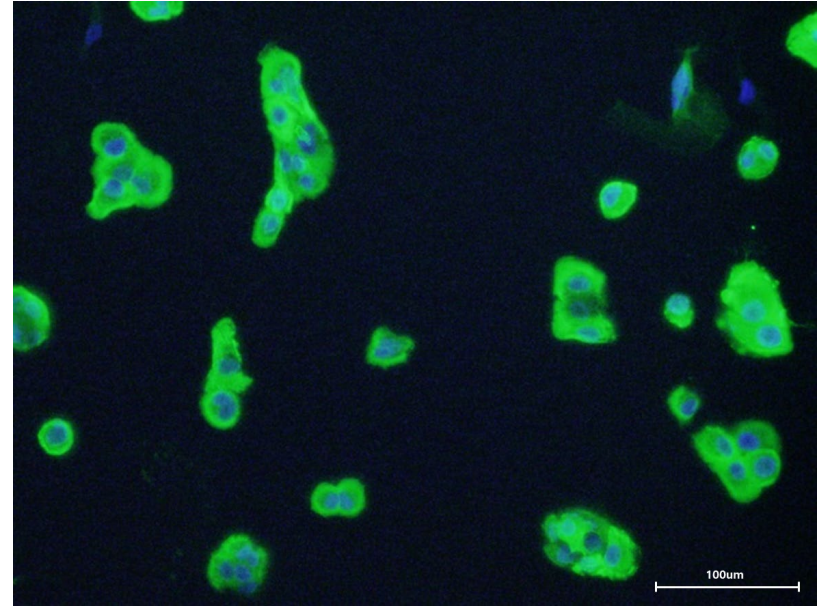

**Insulin**

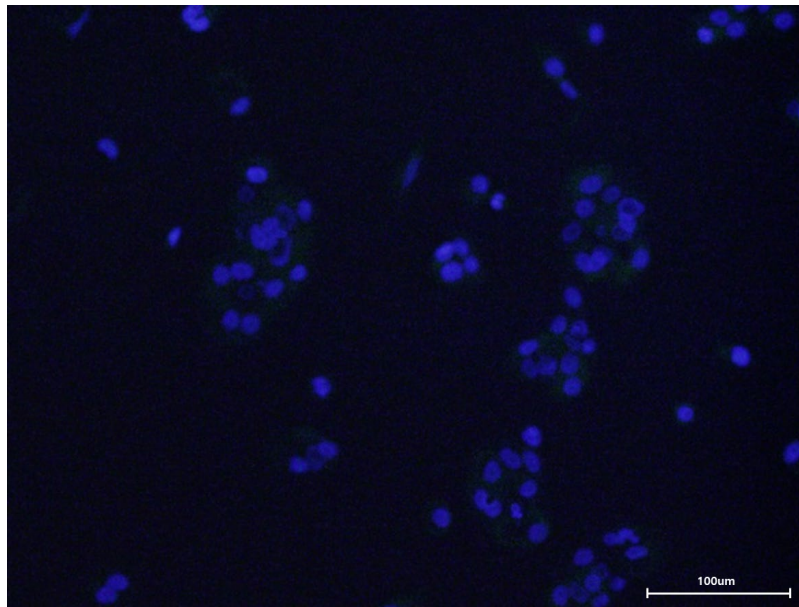

**Vimentin**

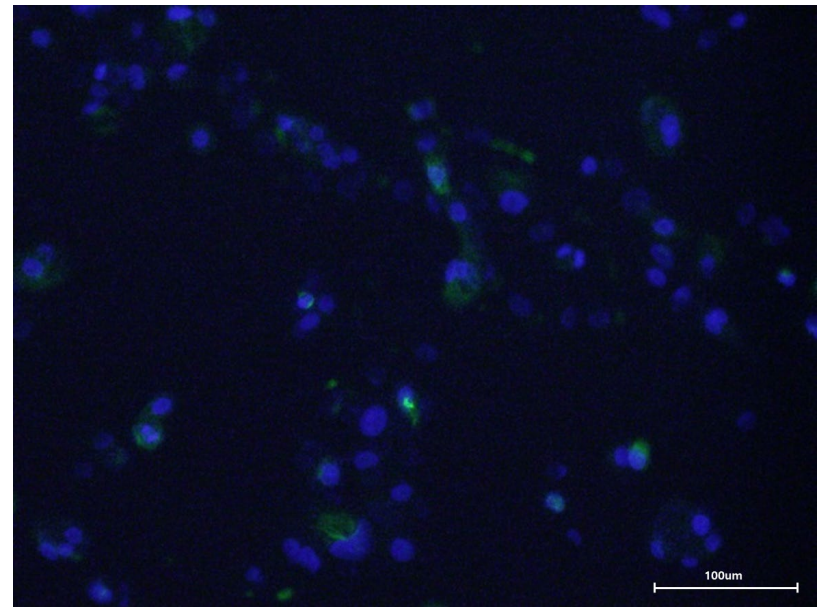

# YPAC-29

**a-Amylase**

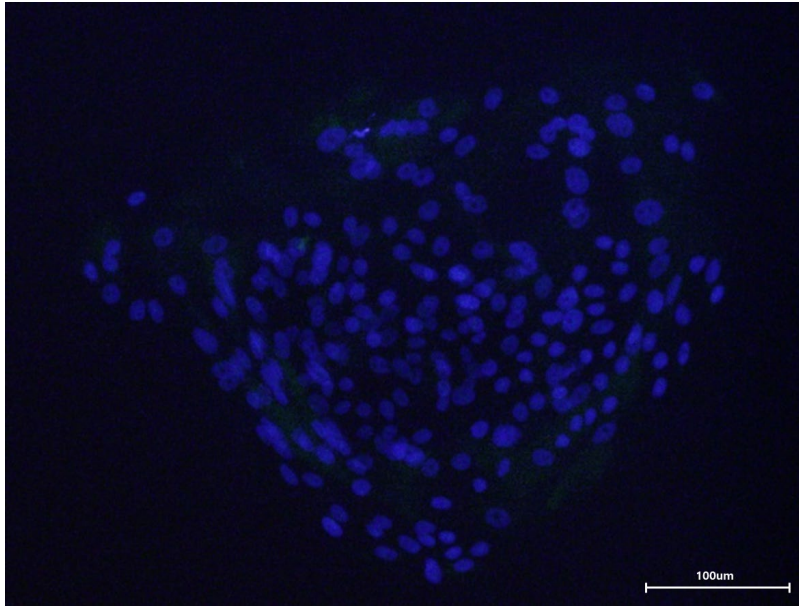

**Cytokeratin 19**

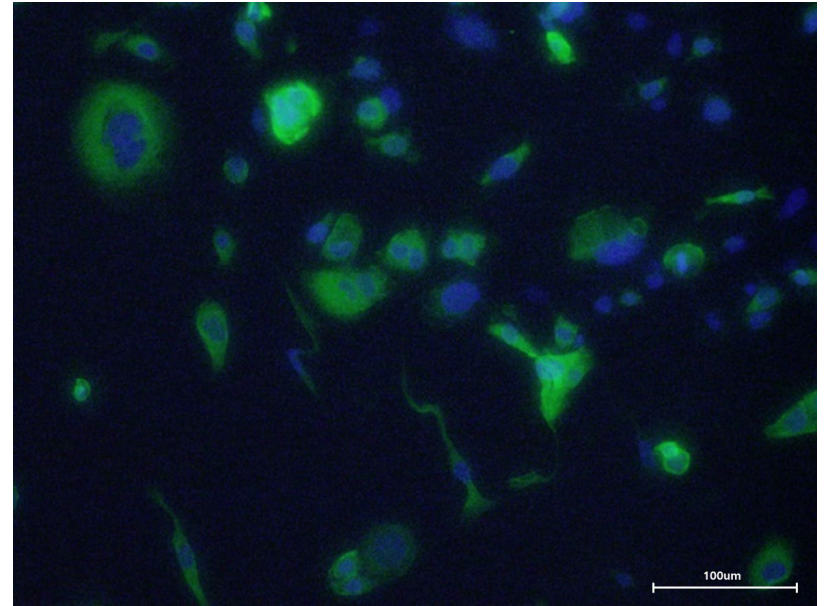

**Insulin**

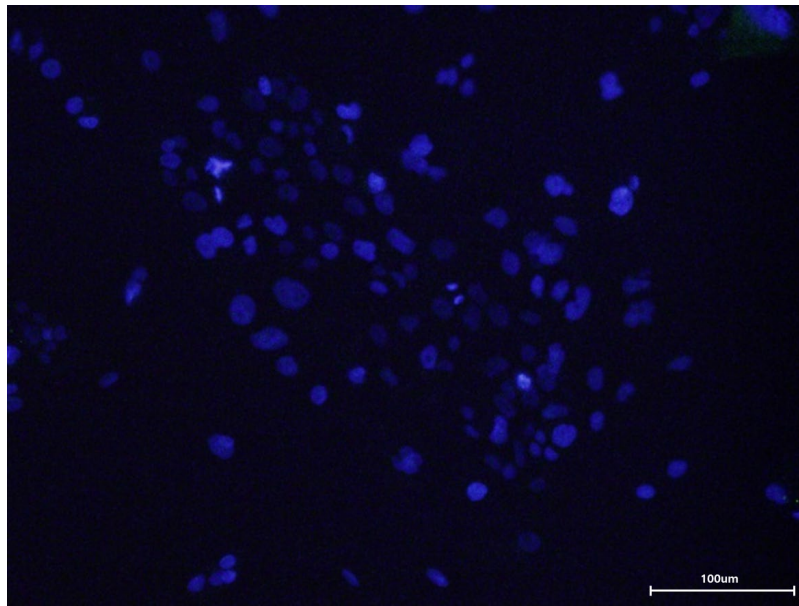

**Vimentin**

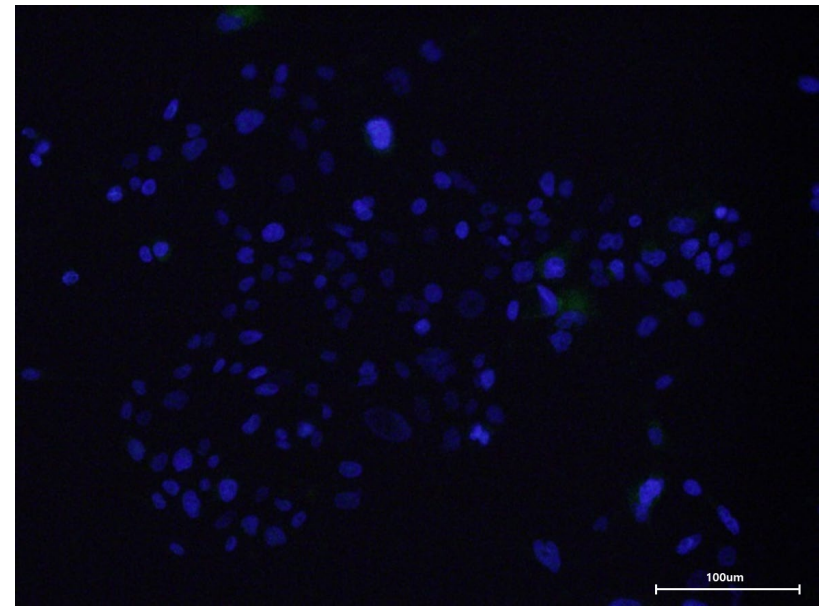

# YPAC-30

**a-Amylase**

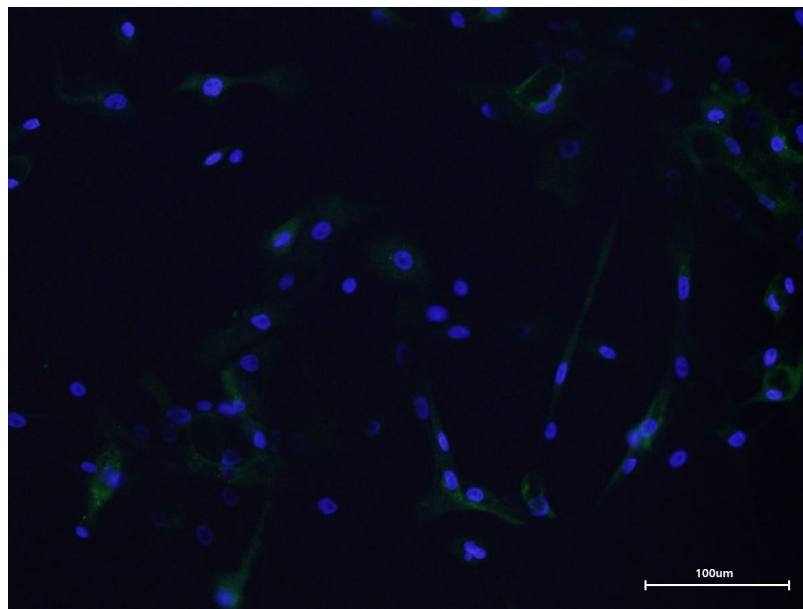

**Cytokeratin 19**

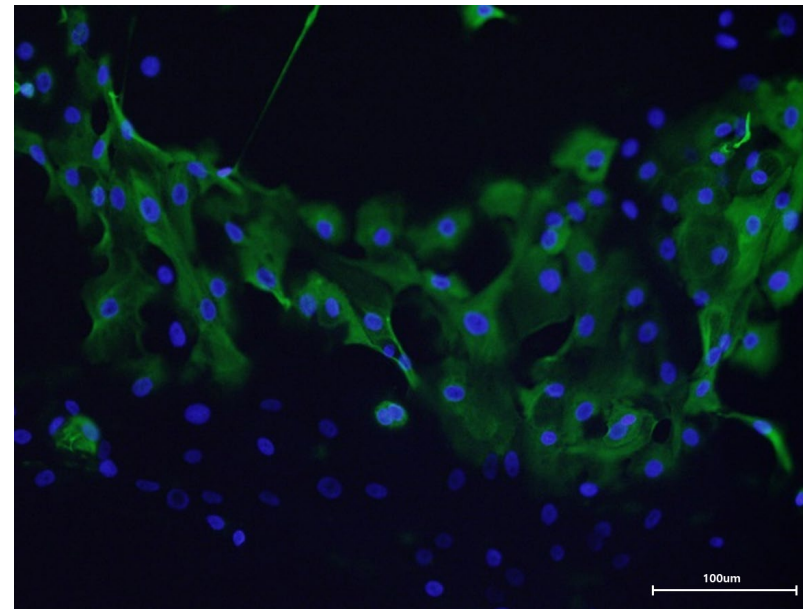

**Insulin**

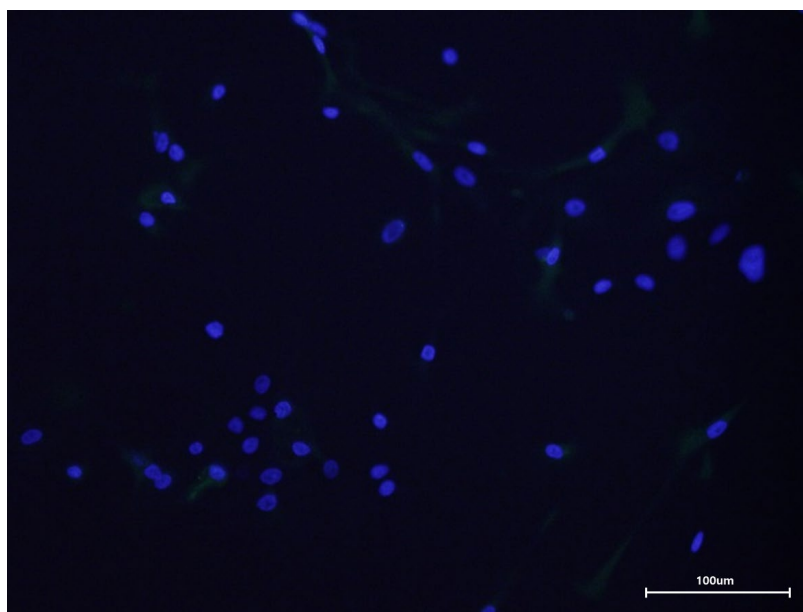

**Vimentin**

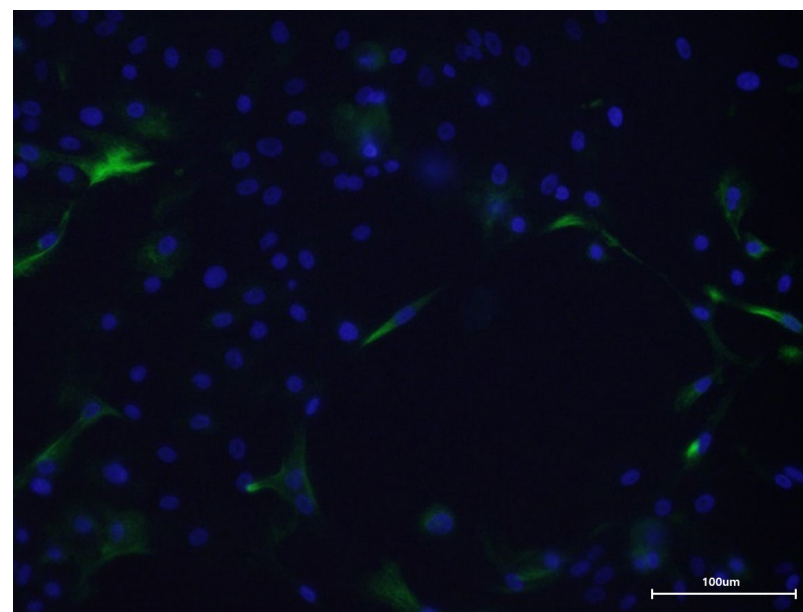

# YPAC-31

**a-Amylase**

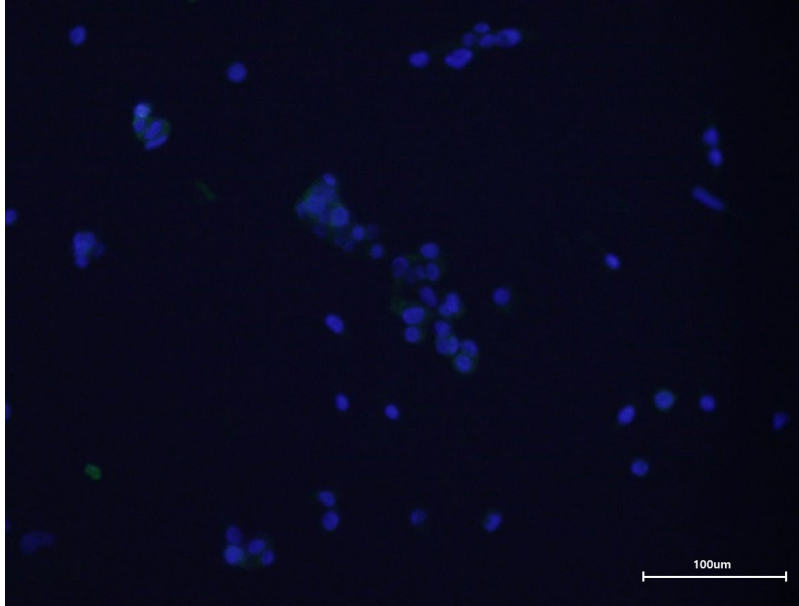

**Cytokeratin 19**

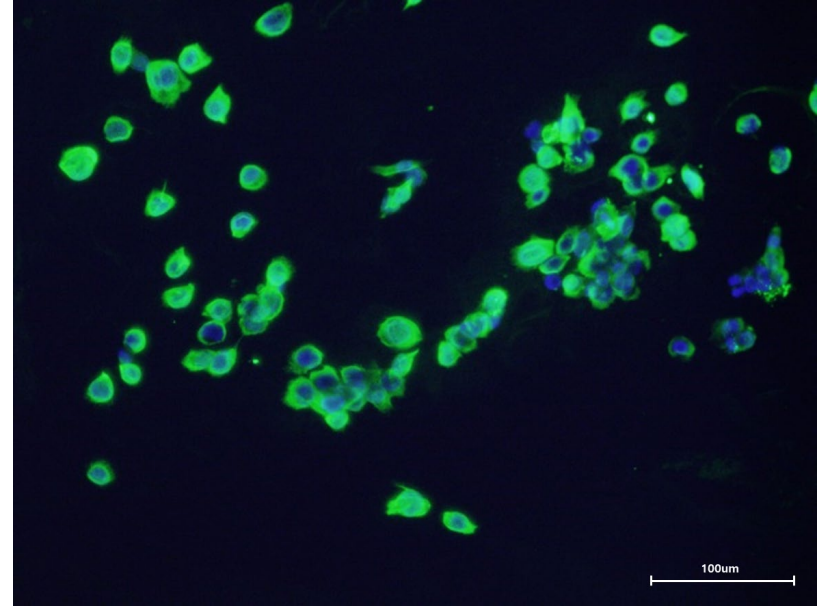

**Insulin**

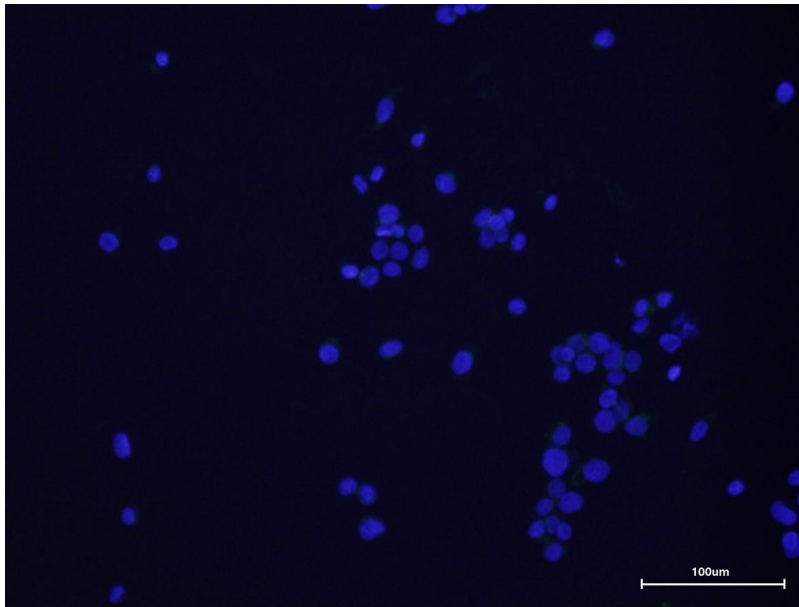

**Vimentin**

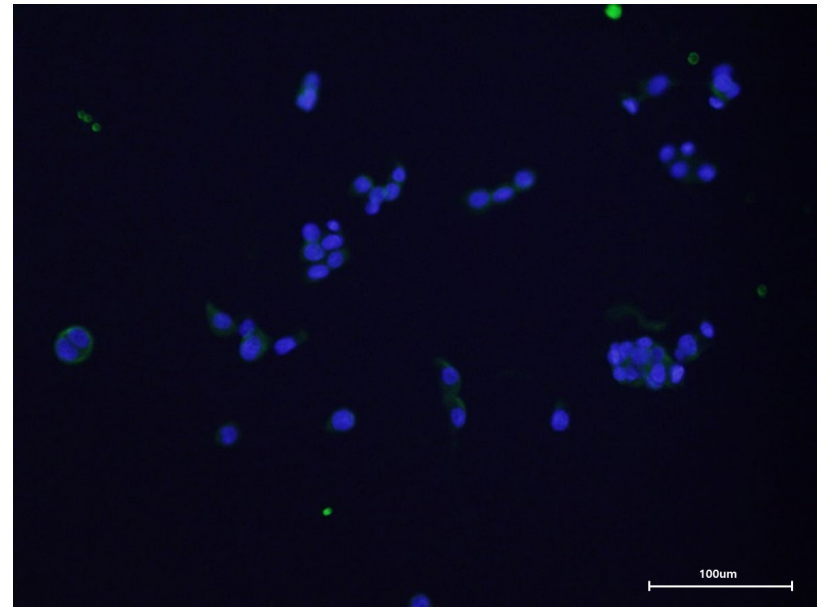

# YPAC-32

**a-Amylase**

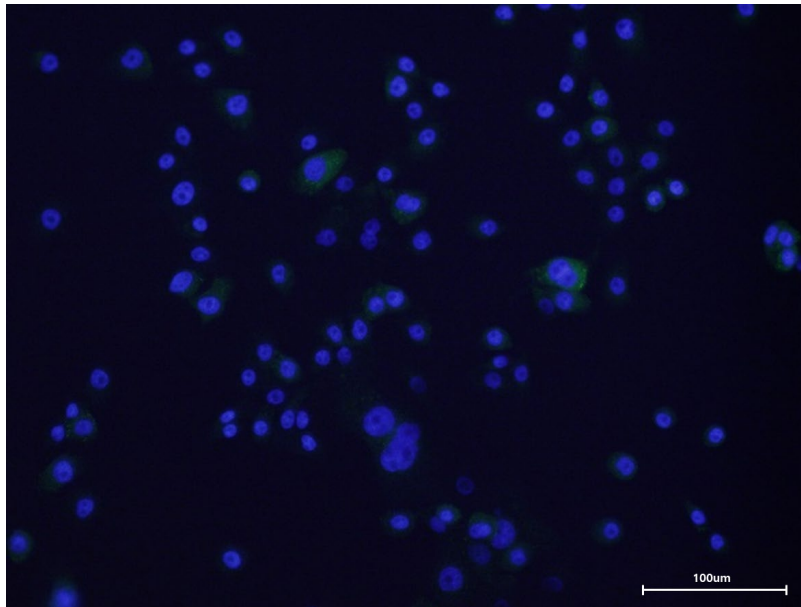

**Cytokeratin 19**

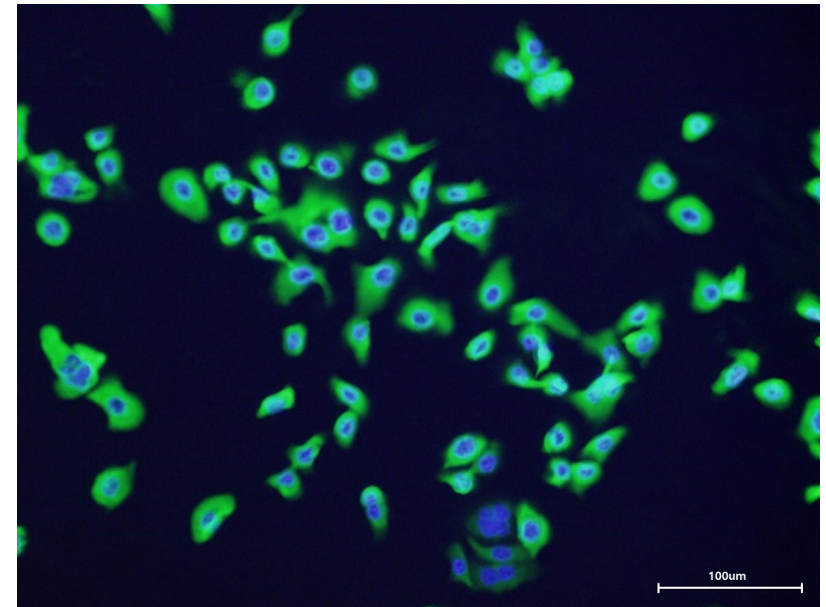

**Insulin**

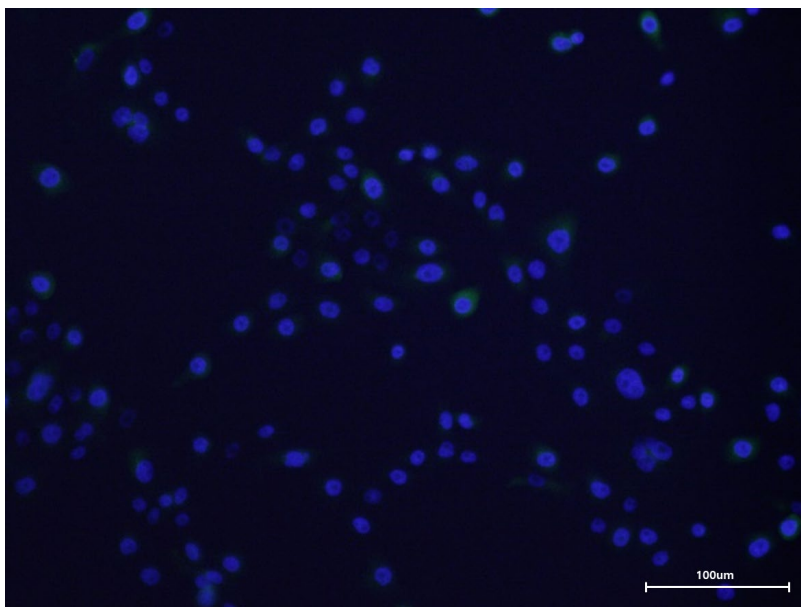

**Vimentin**

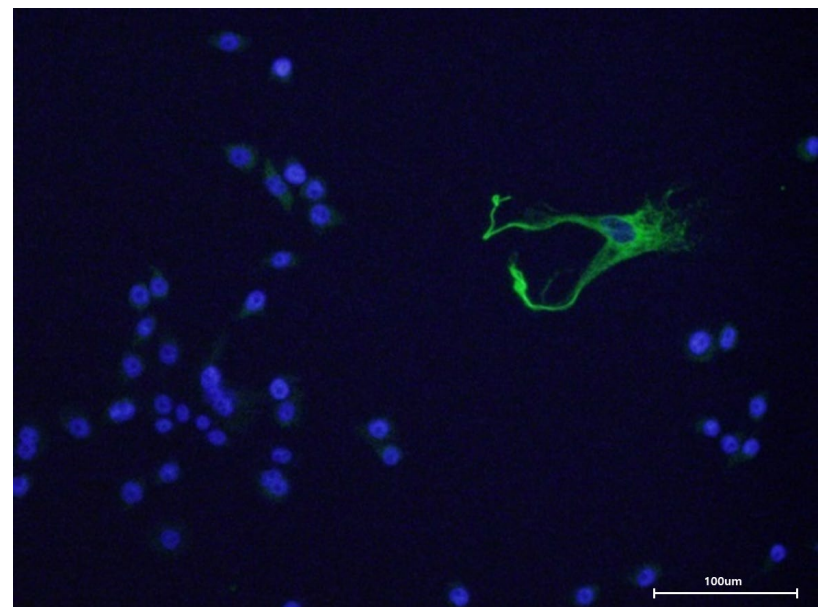

# YPAC-33

**a-Amylase**

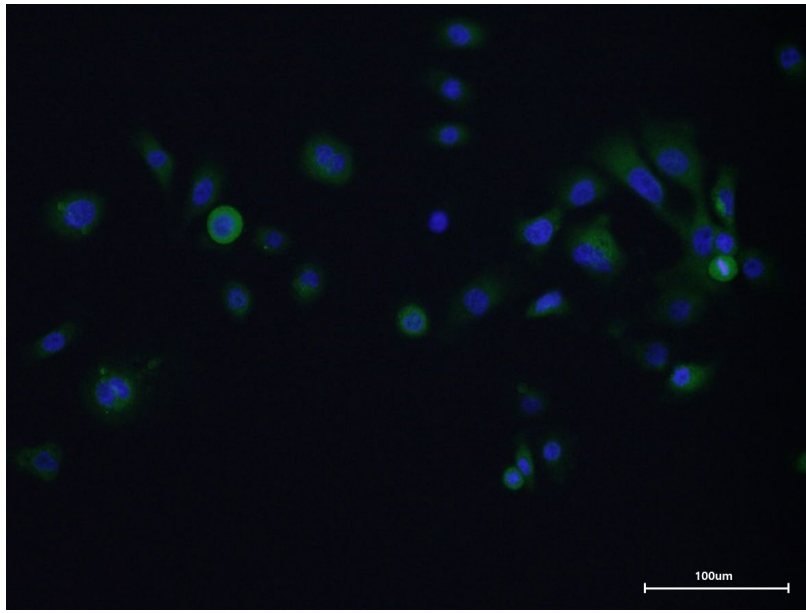

**Cytokeratin 19**

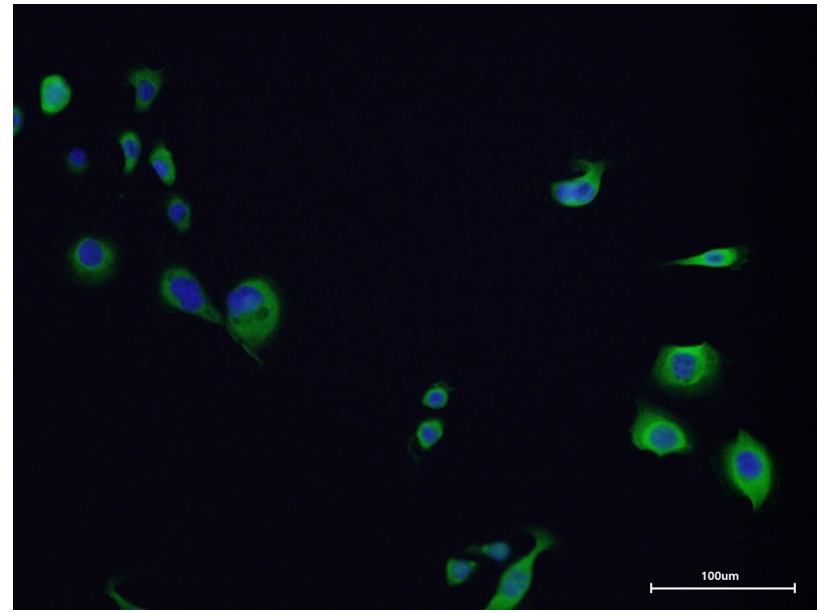

**Insulin**

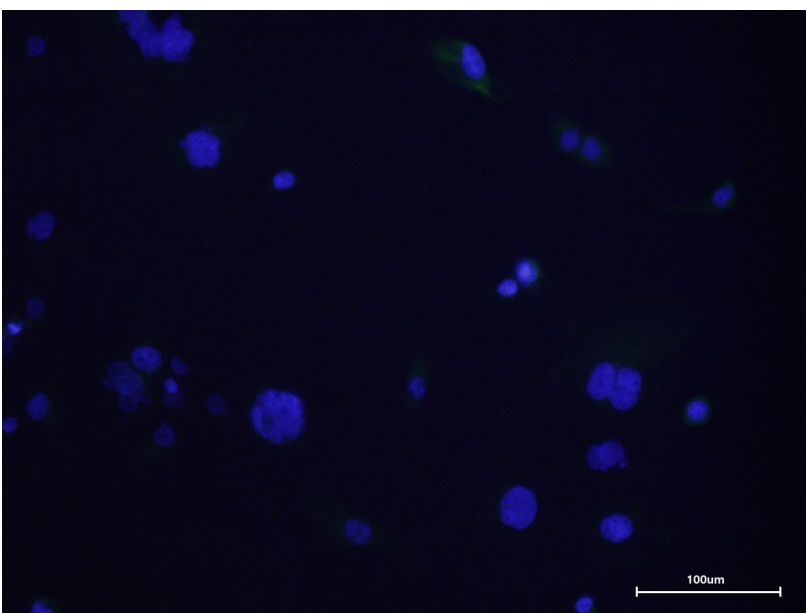

**Vimentin**

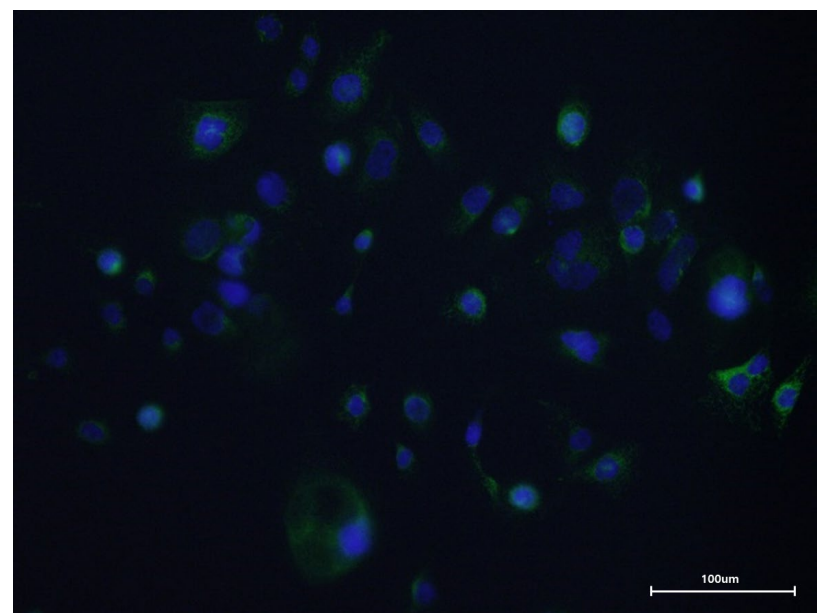



# YPAC-34

**a-Amylase**

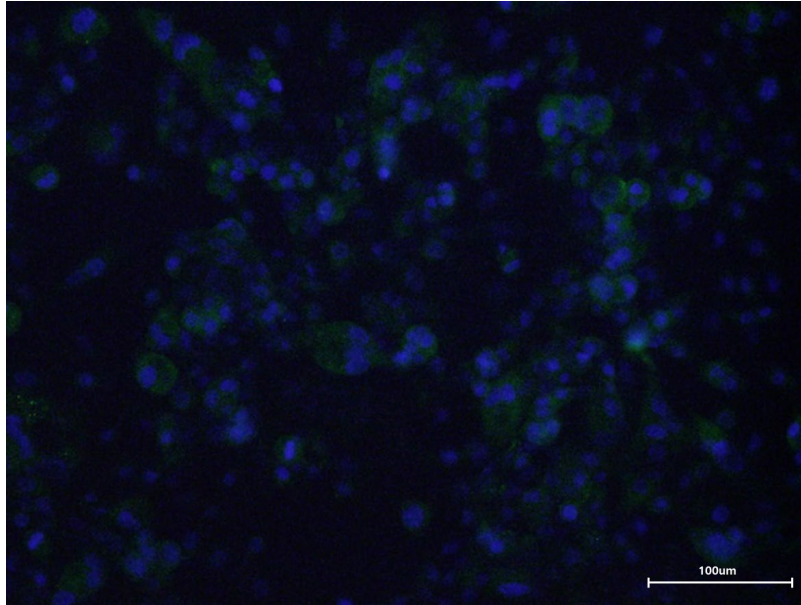

**Cytokeratin 19**

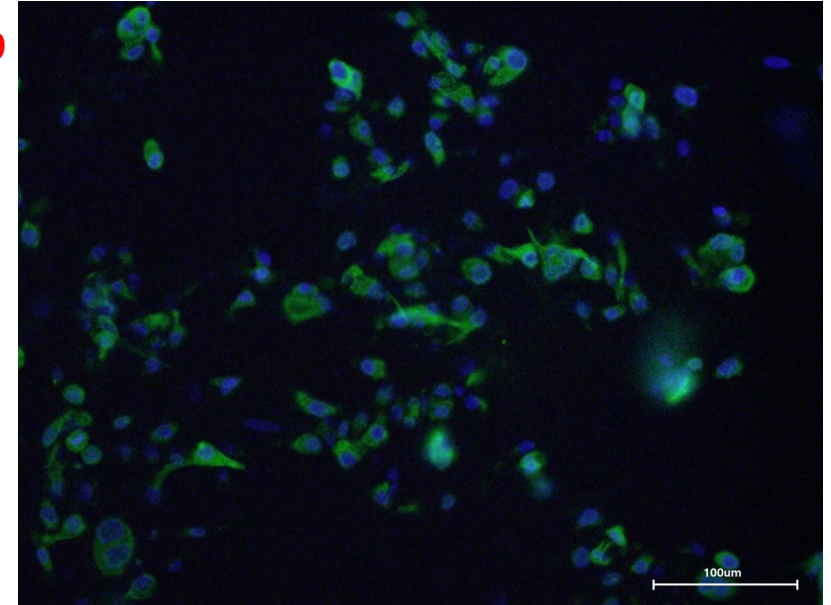

**Insulin**

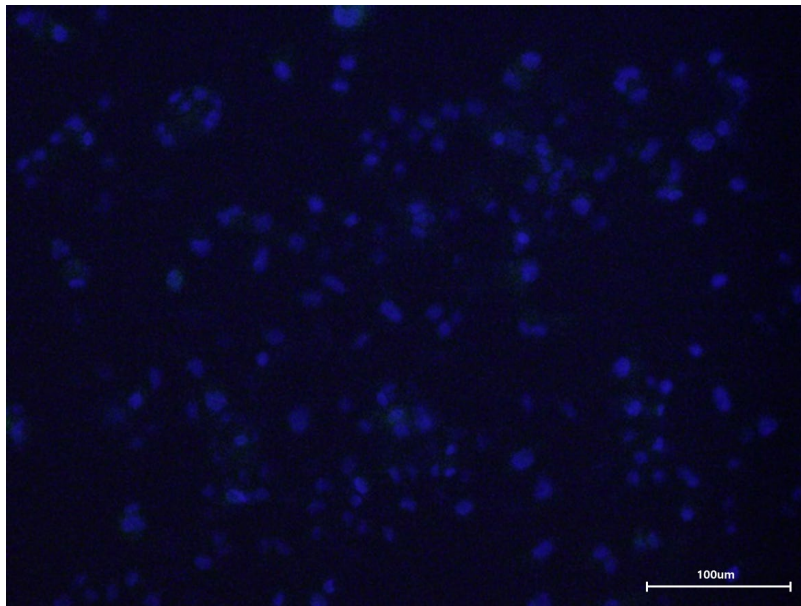

**Vimentin**

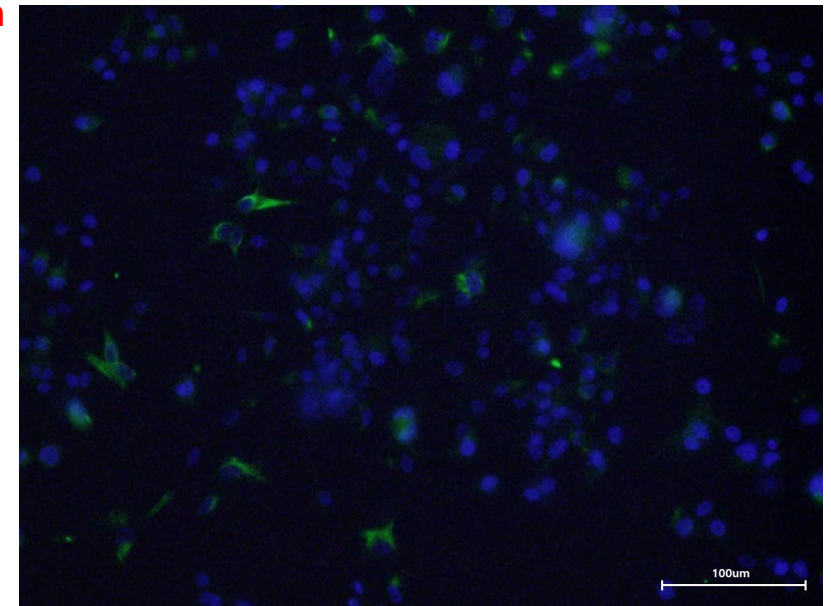

**a-Amylase**

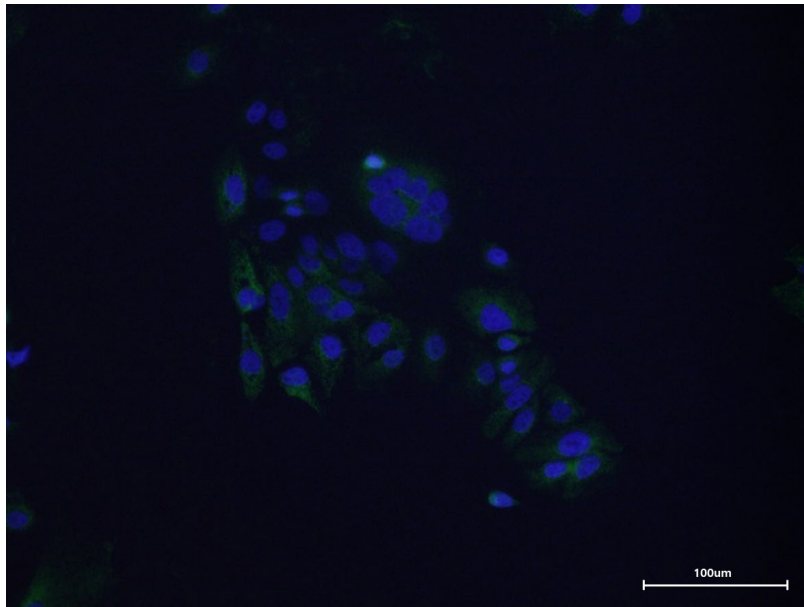

**Cytokeratin 19**

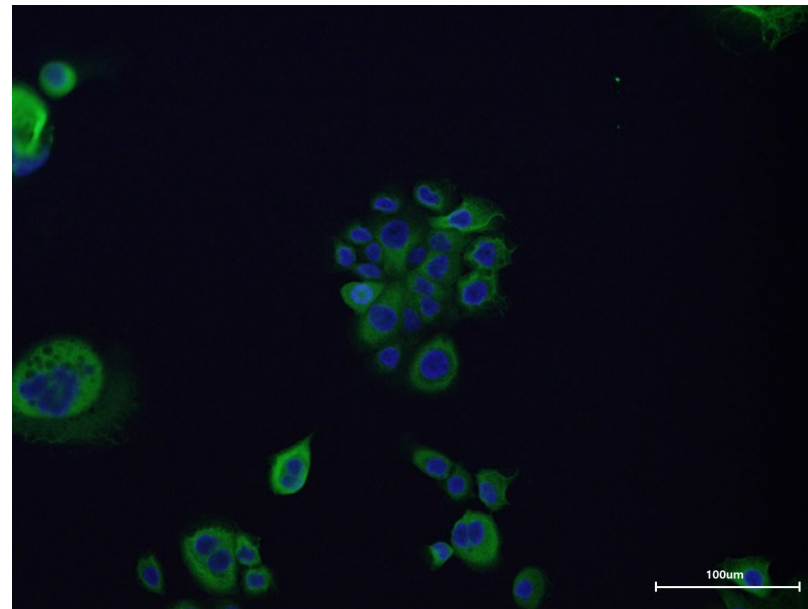

**Insulin**

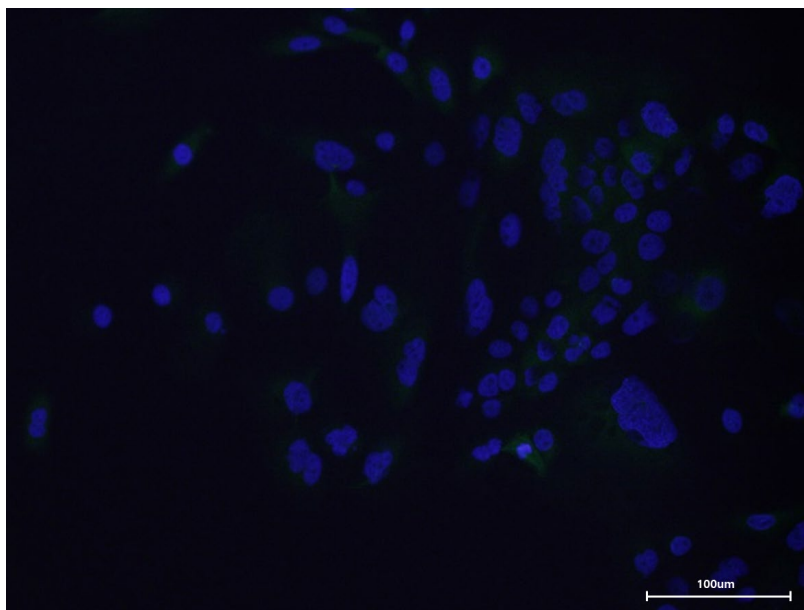

**Vimentin**

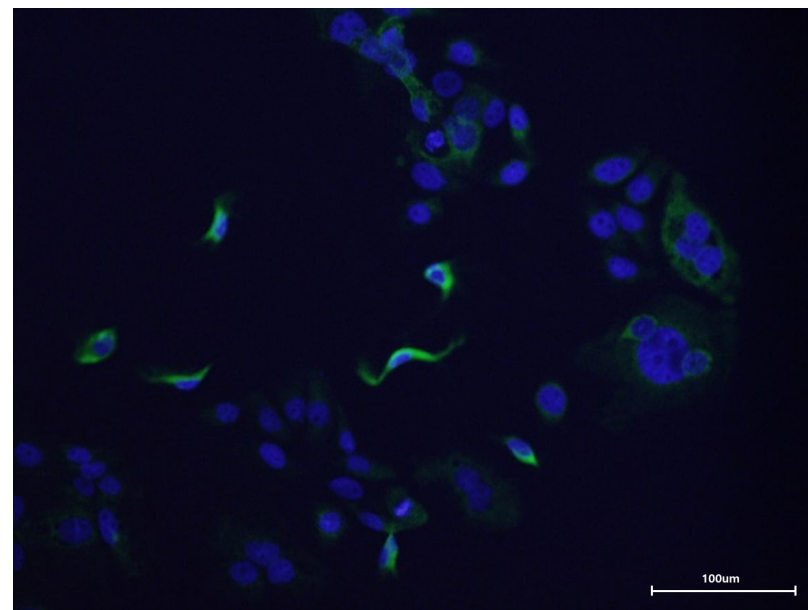

# YPAC-37

**a-Amylase**

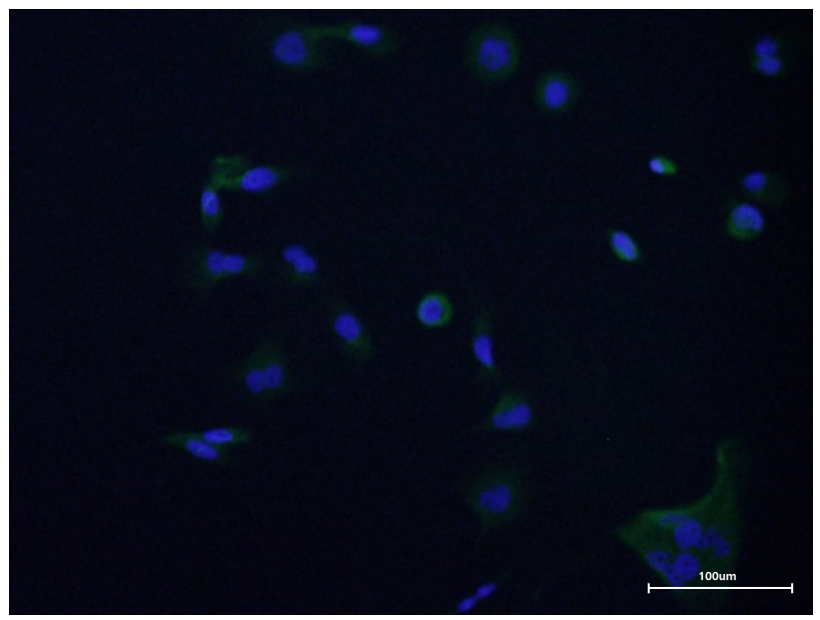

**Cytokeratin 19**

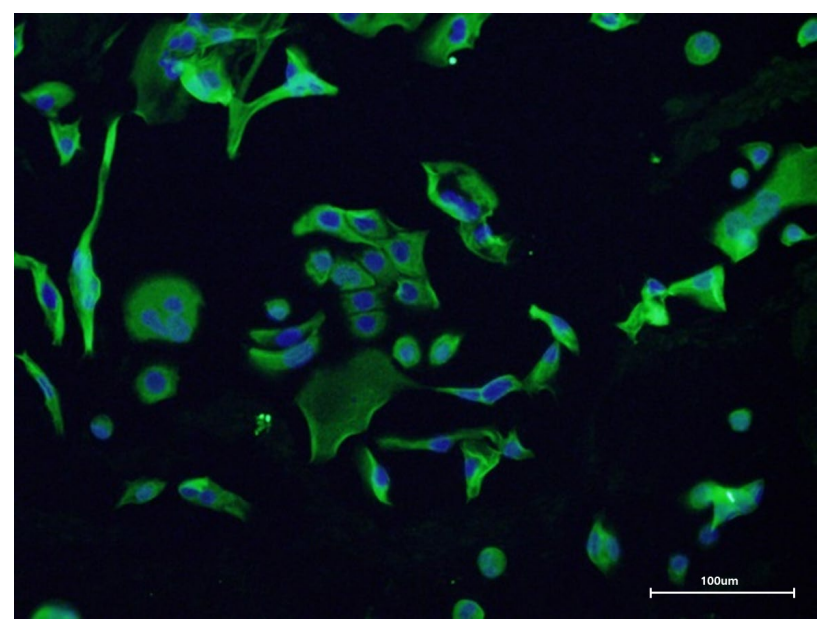

**Insulin**

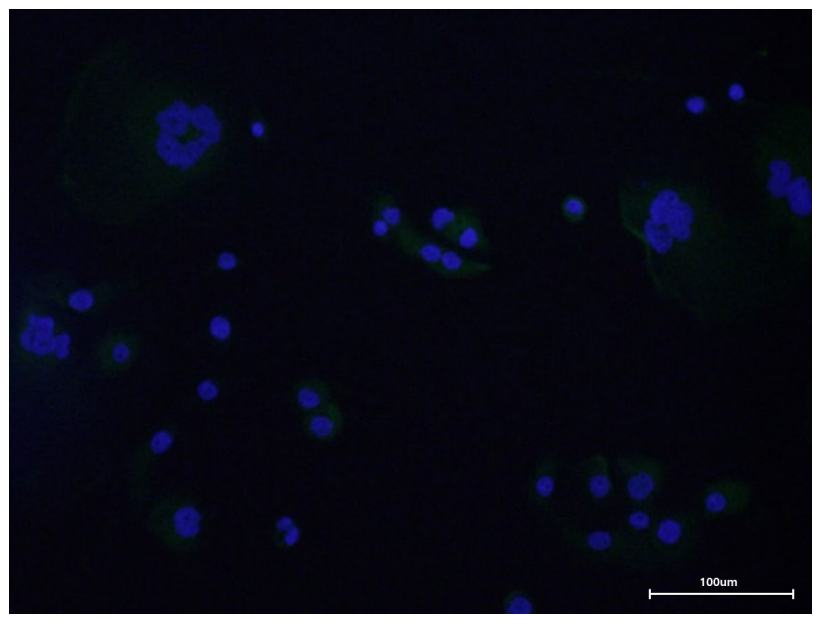

**Vimentin**

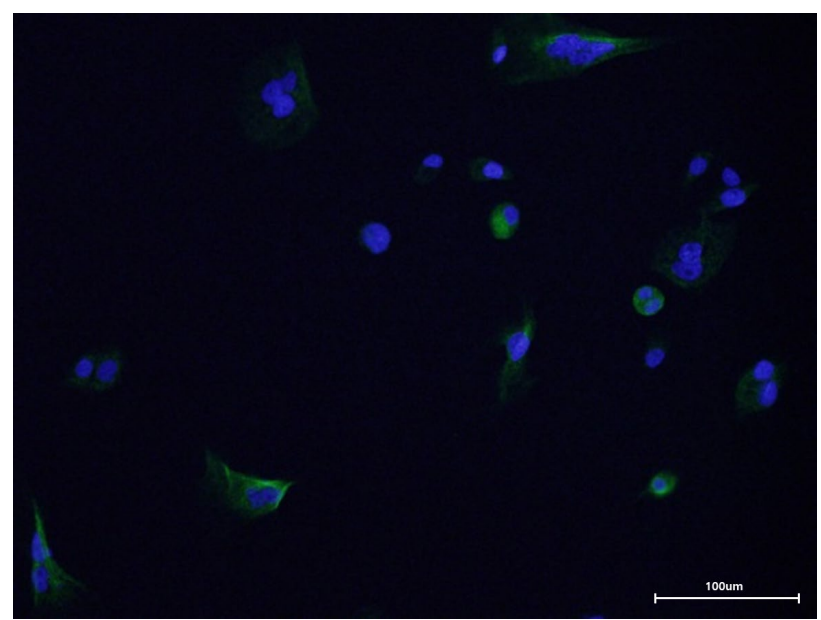

YPAC-39

**a-Amylase**

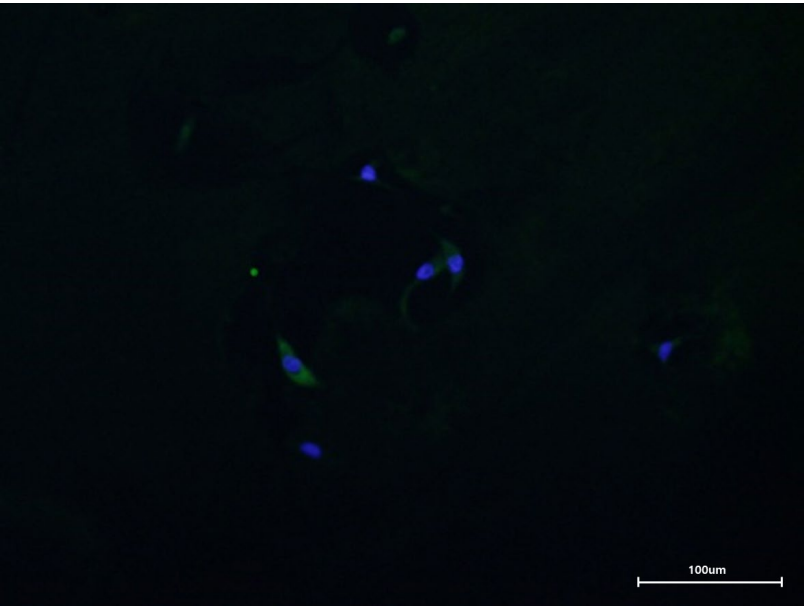

**Cytokeratin 19**

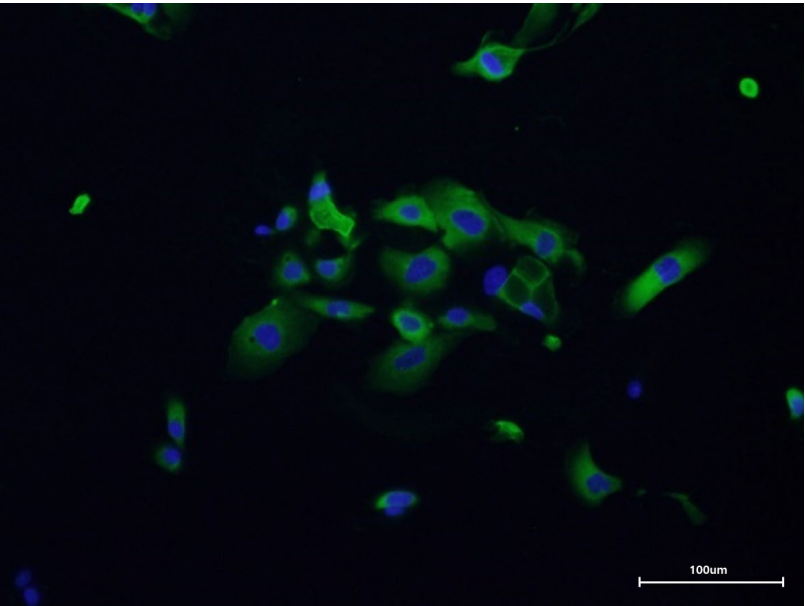

**Insulin**

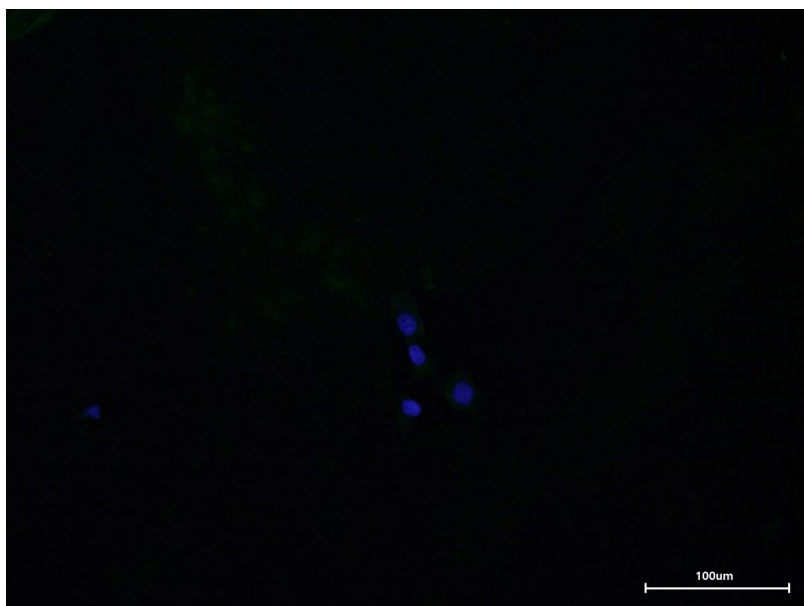

**Vimentin**

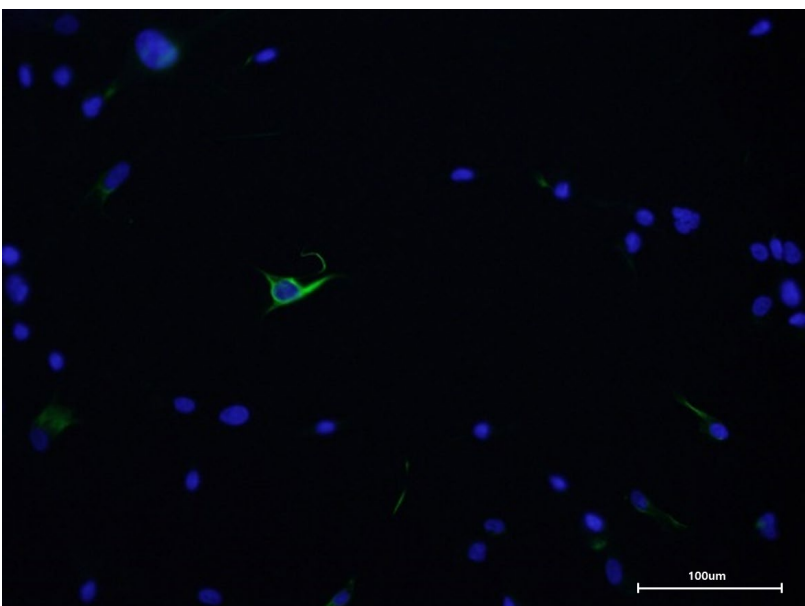

# YPAC-43

**a-Amylase**

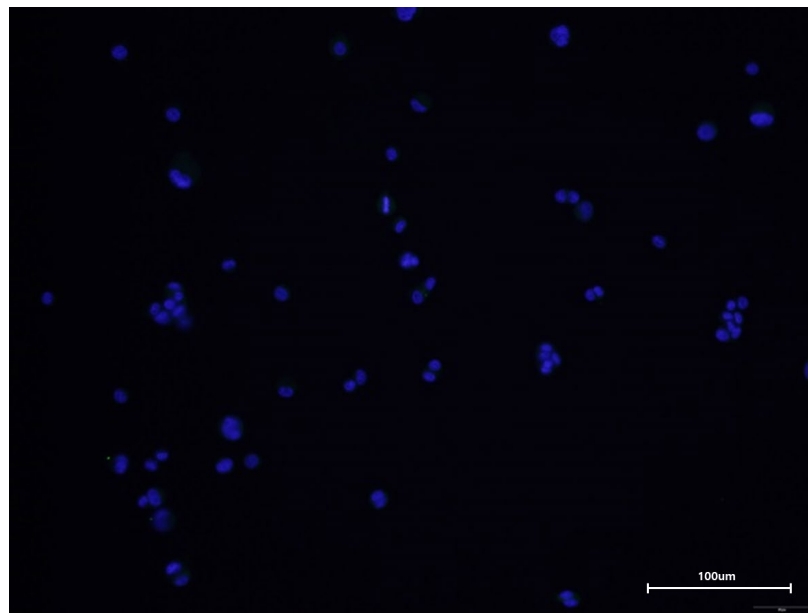

**Cytokeratin 19**

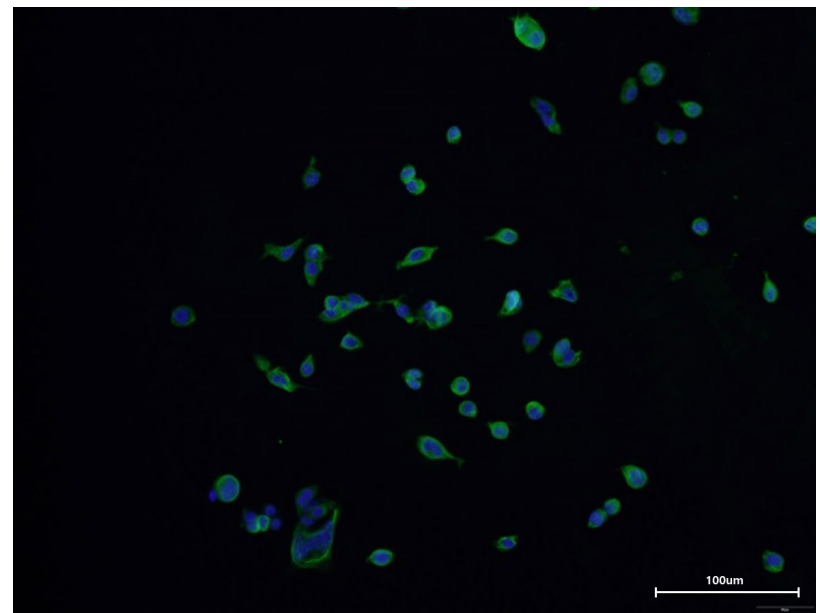

**Insulin**

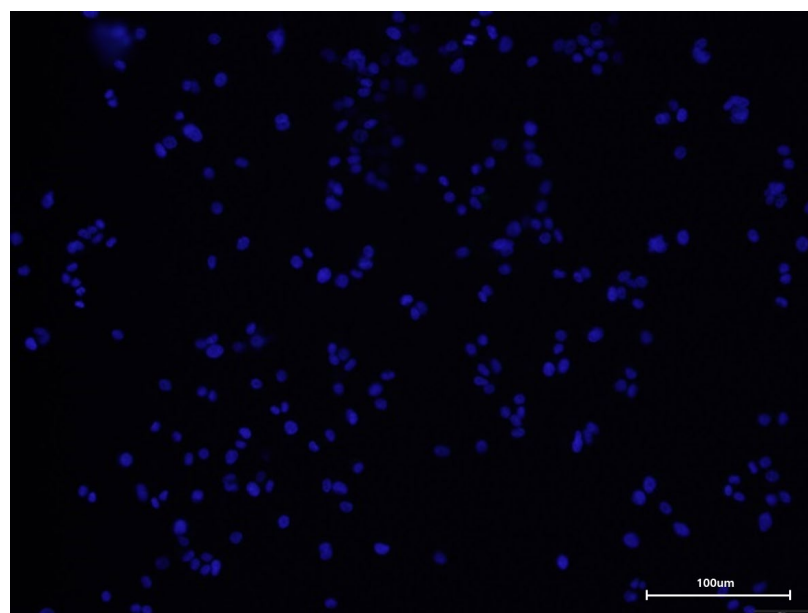

**Vimentin**

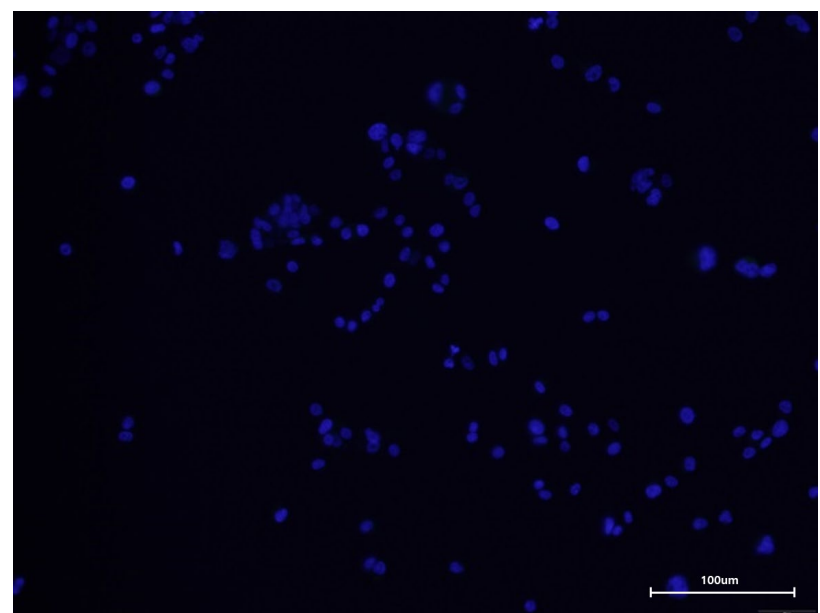

**YPAC-44**

**a-Amylase**

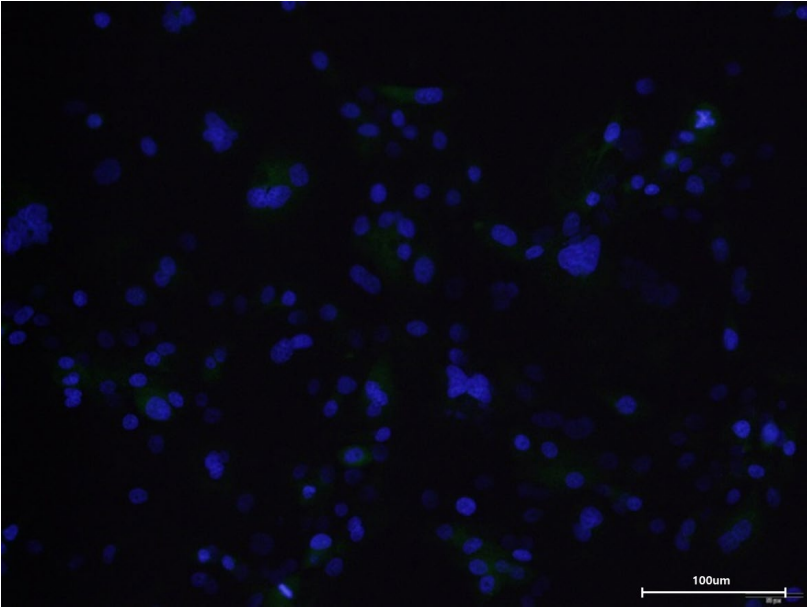

**Cytokeratin 19**

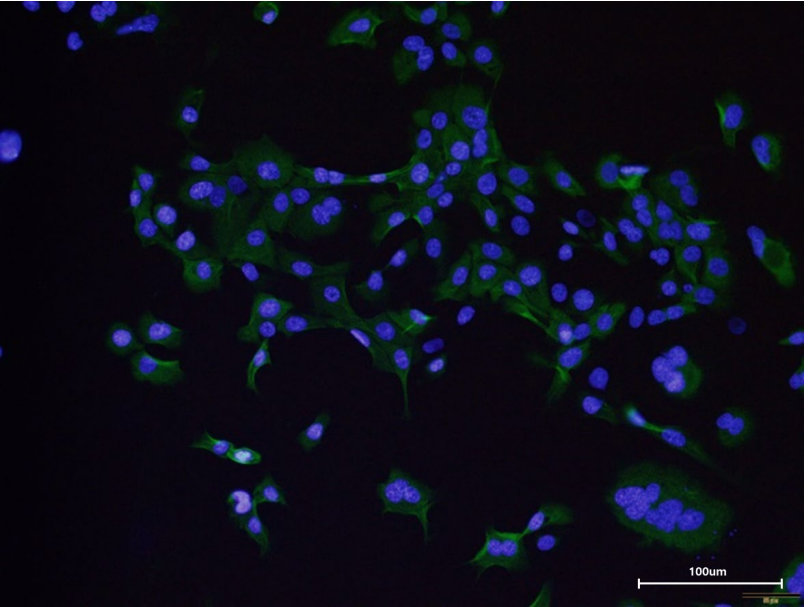

**Insulin**

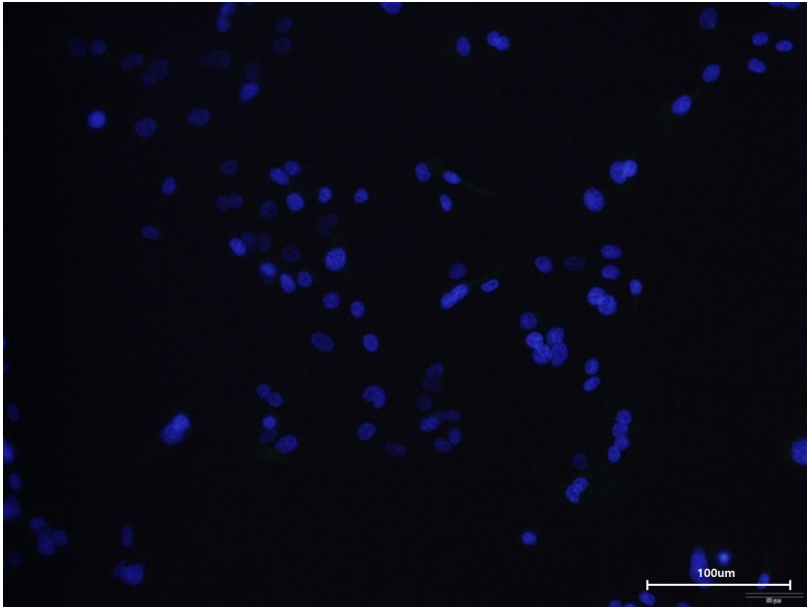

**Vimentin**

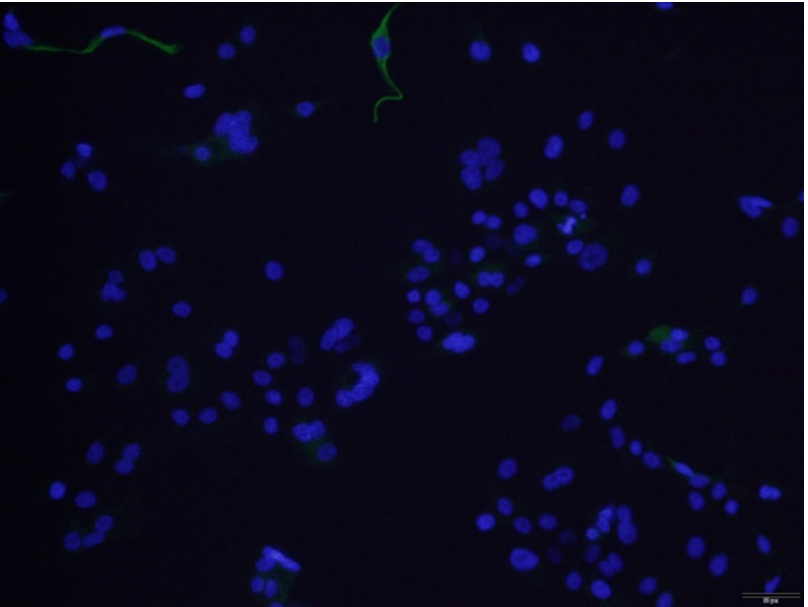

# YPAC-46

**a-Amylase**

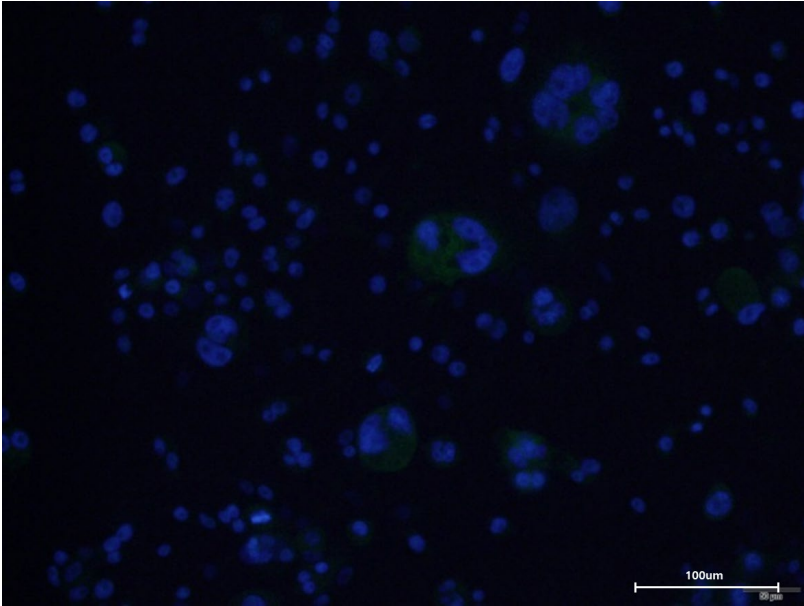

**Cytokeratin 19**

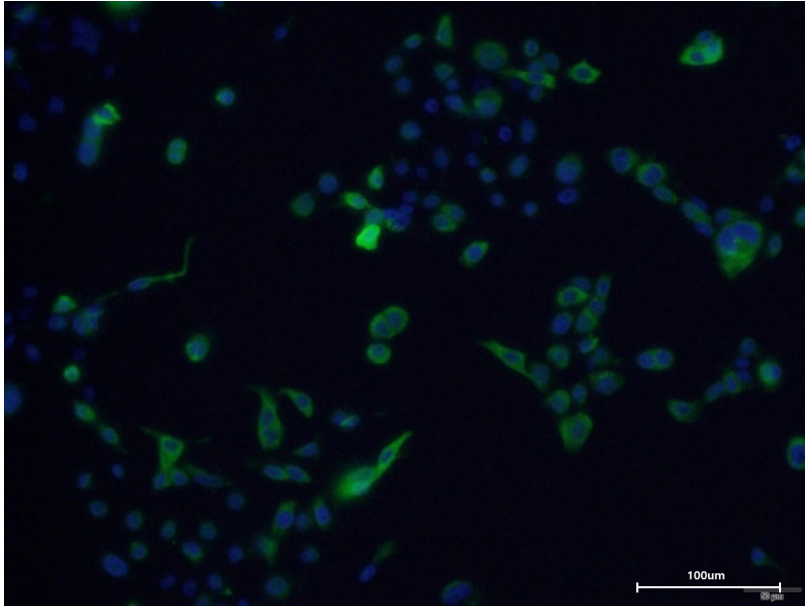

**Insulin**

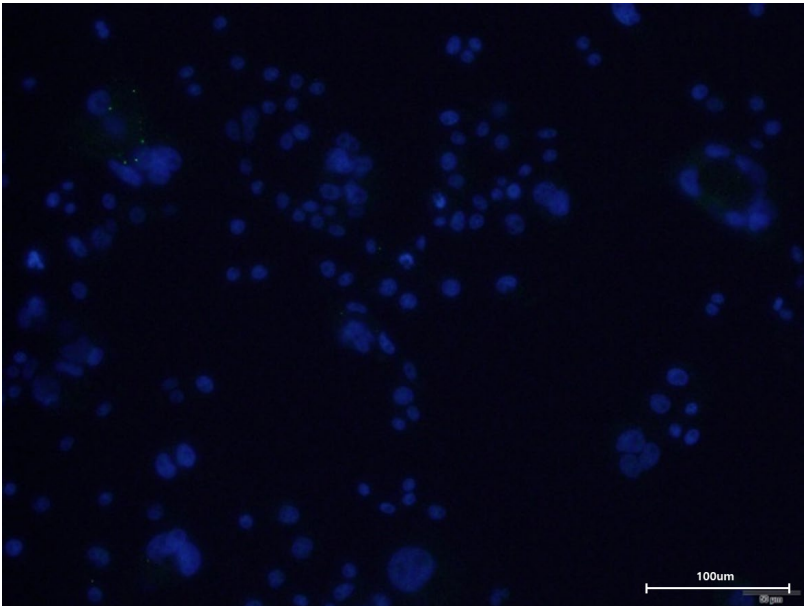

**Vimentin**

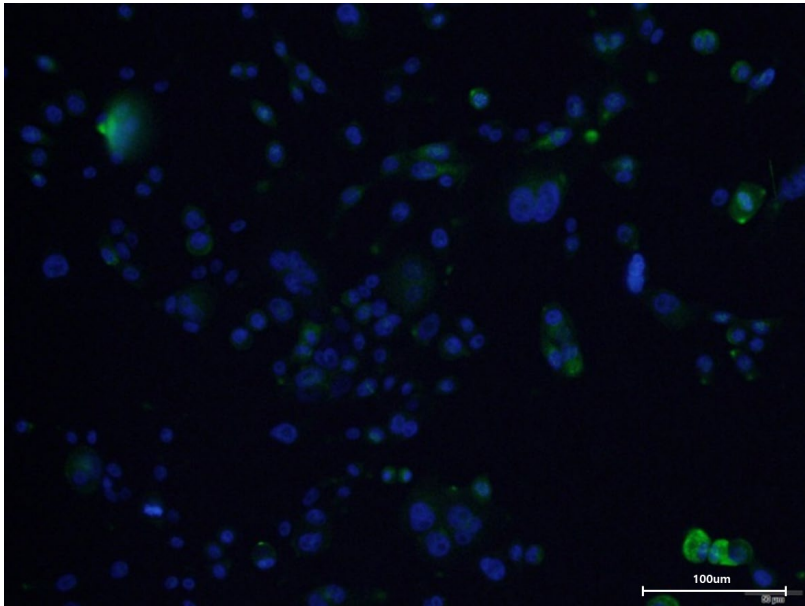

Supplementary Figure 4

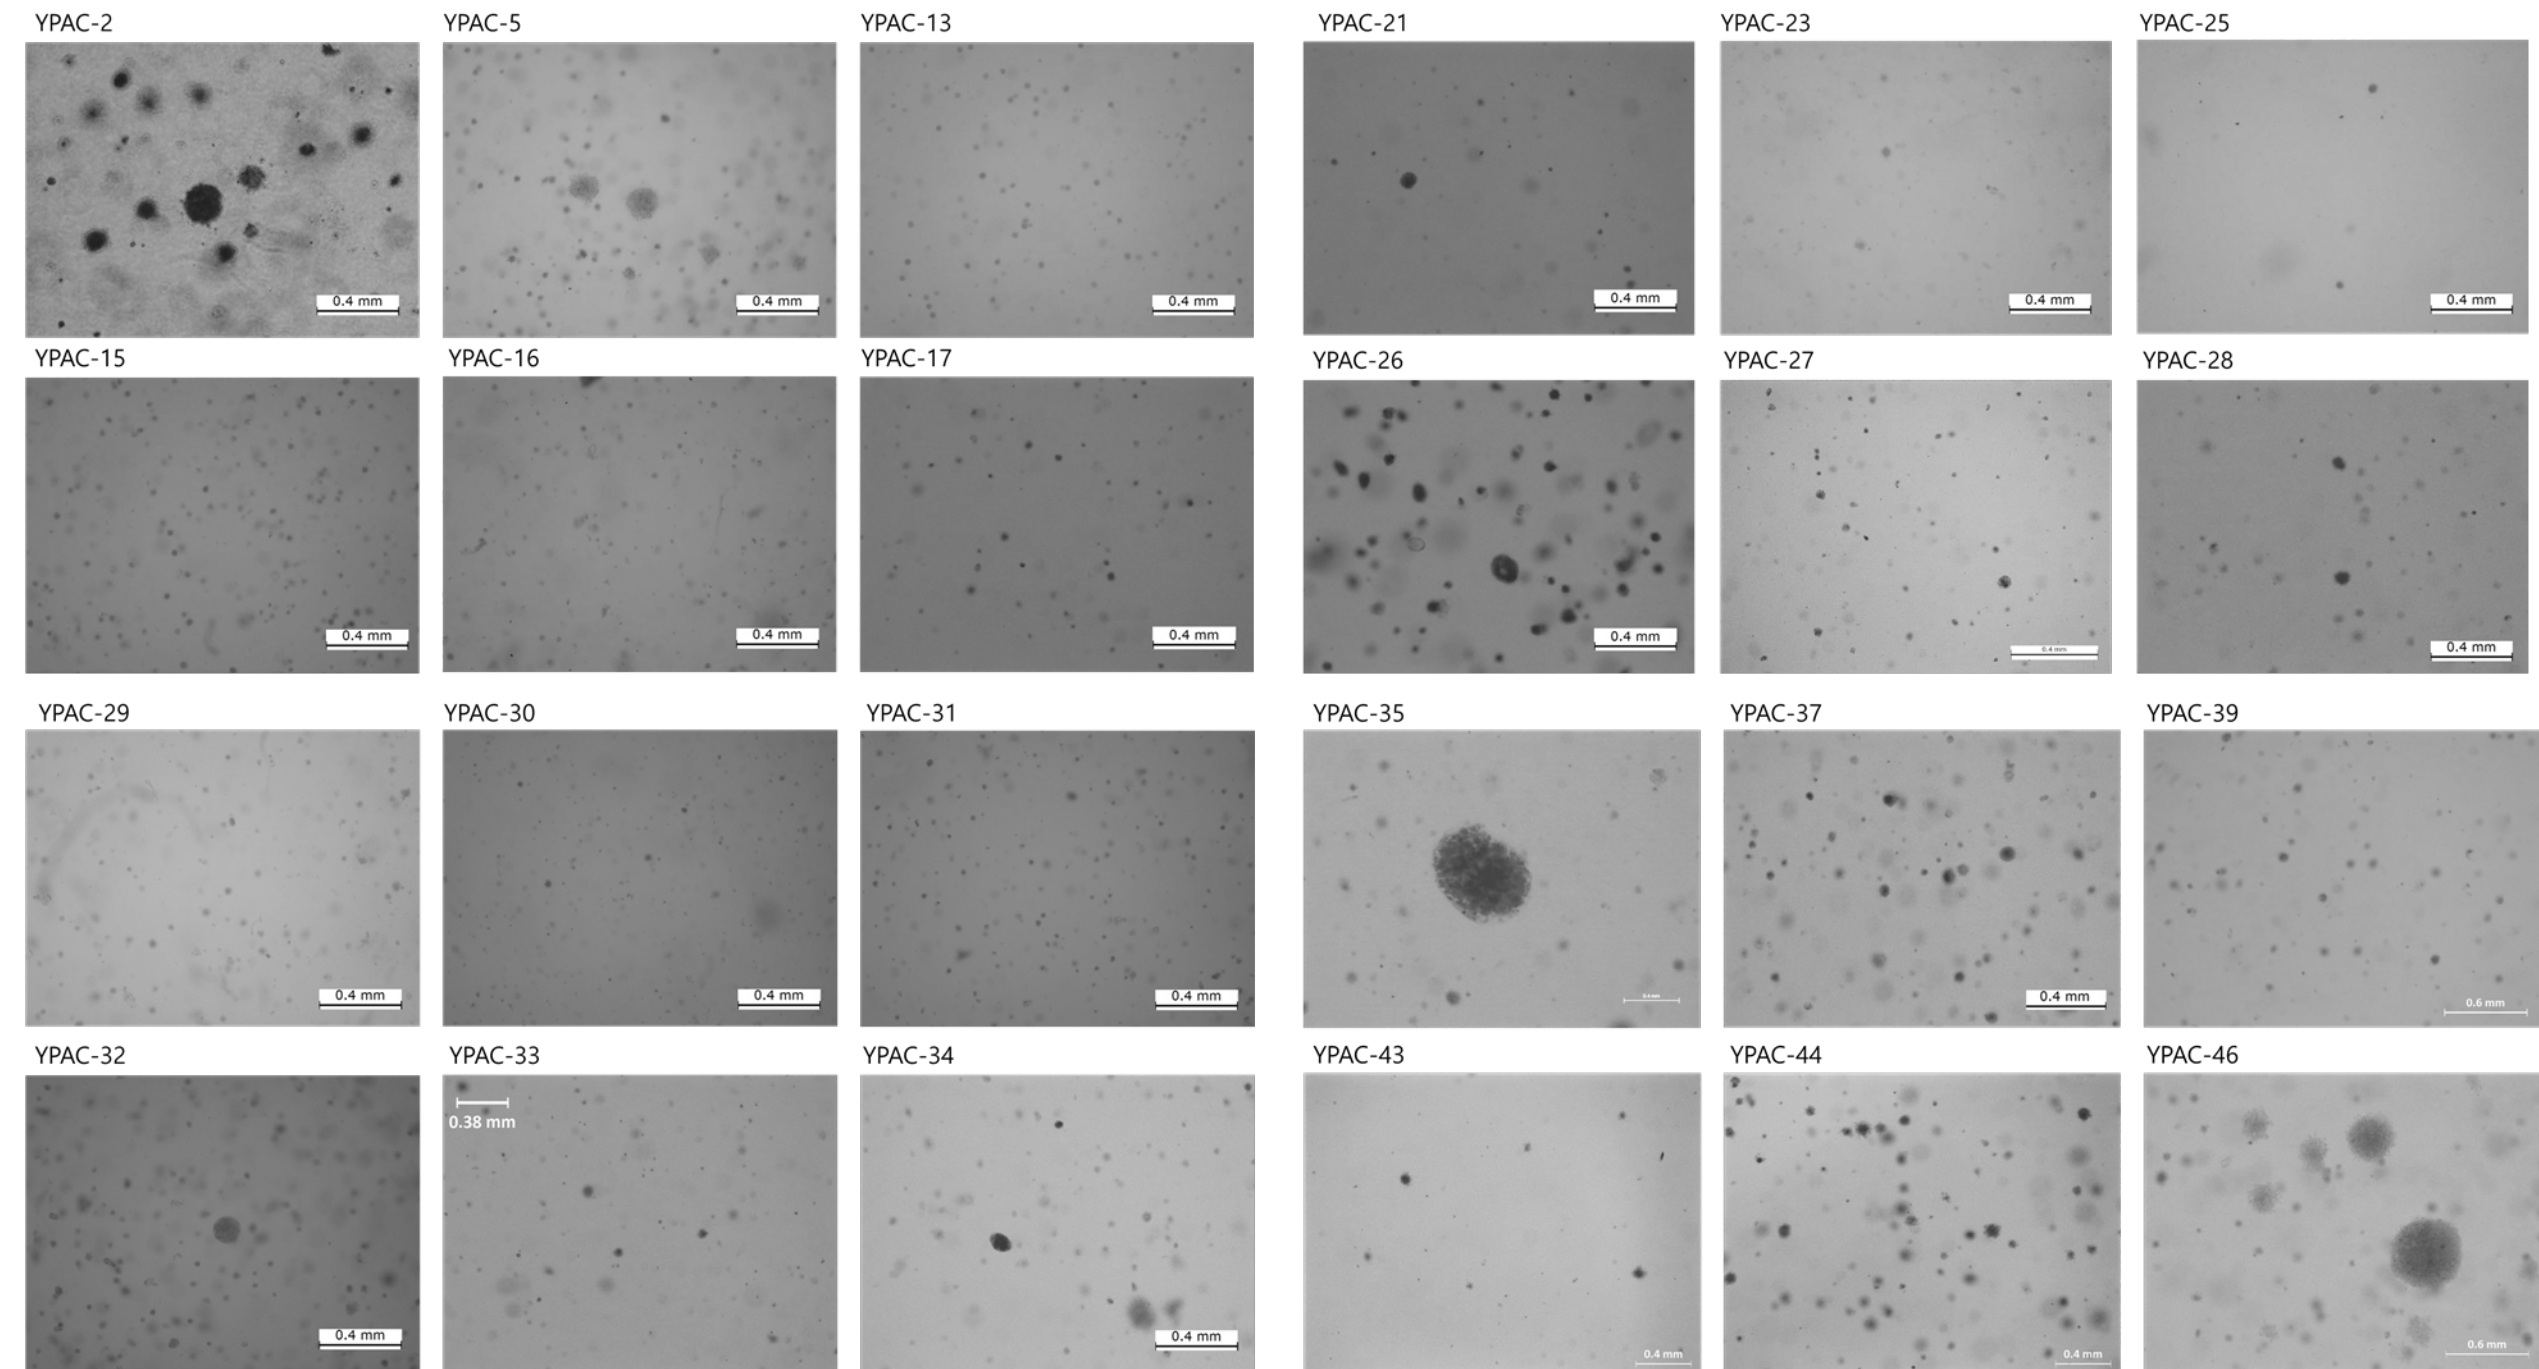



# Supplementary figure 5

## YPAC-5

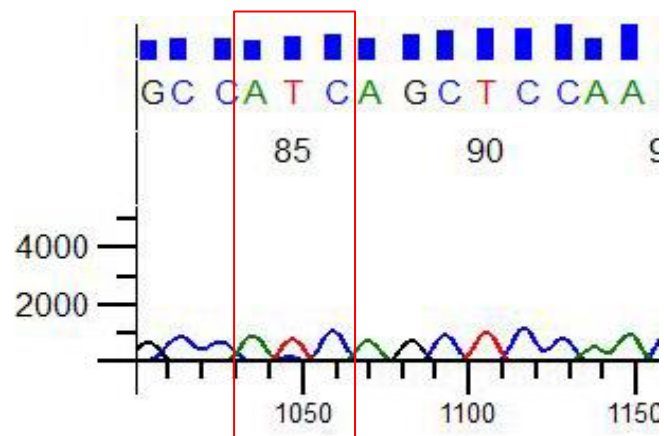

## YPAC-13

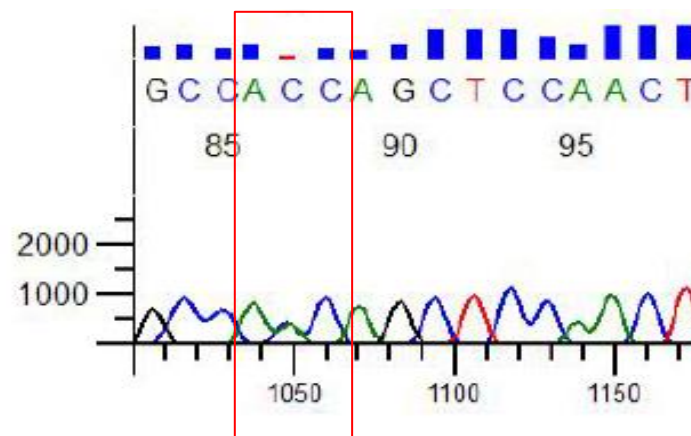

## YPAC-10

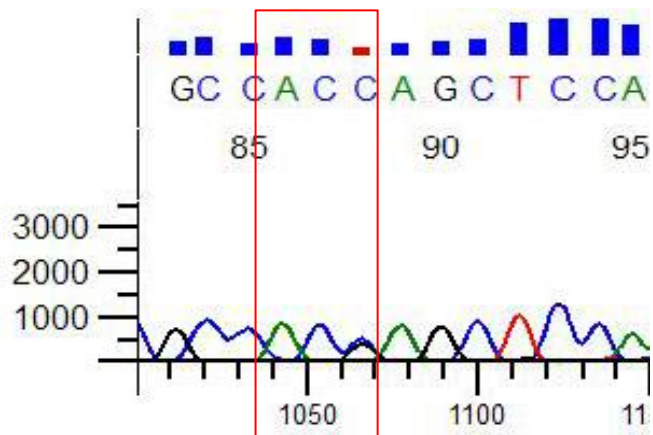

## YPAC-15

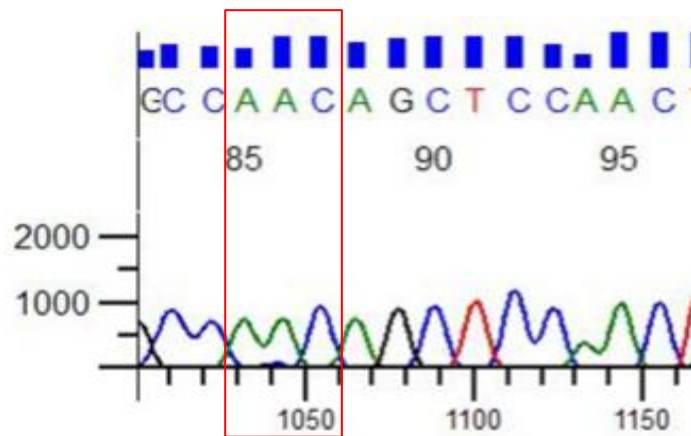

YPAC-16

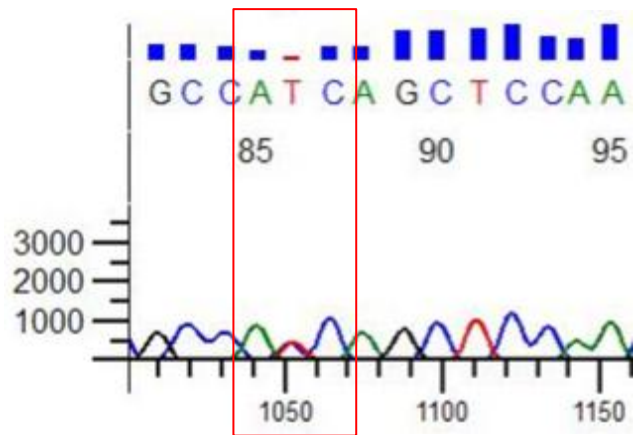

YPAC-20

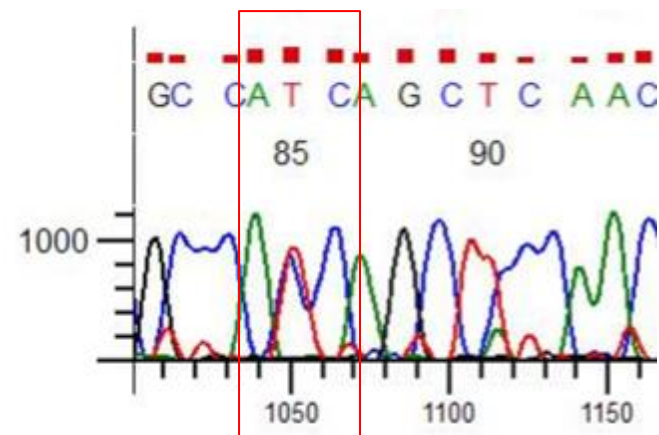

YPAC-17

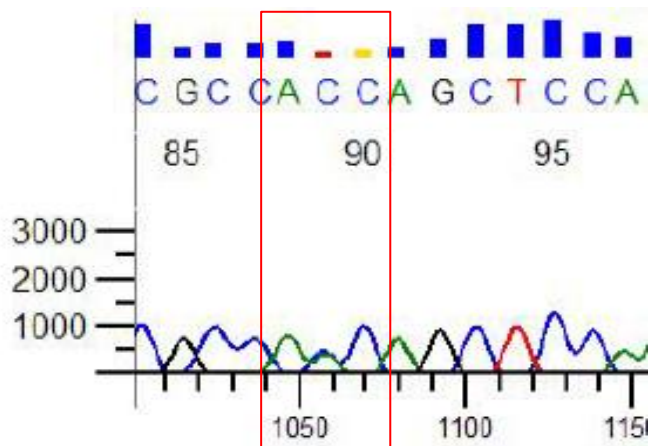

YPAC-21

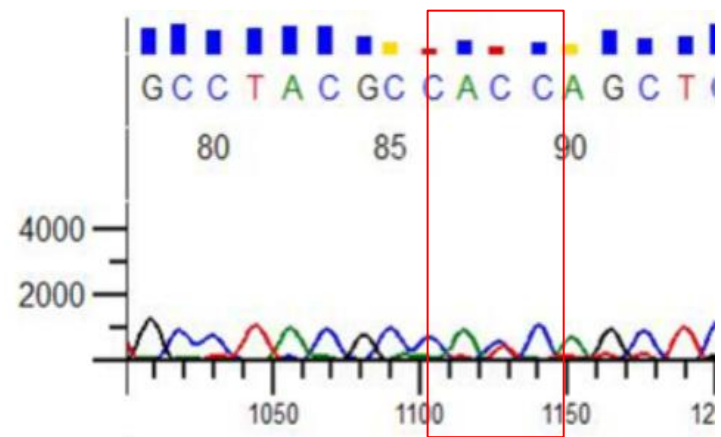

YPAC-23

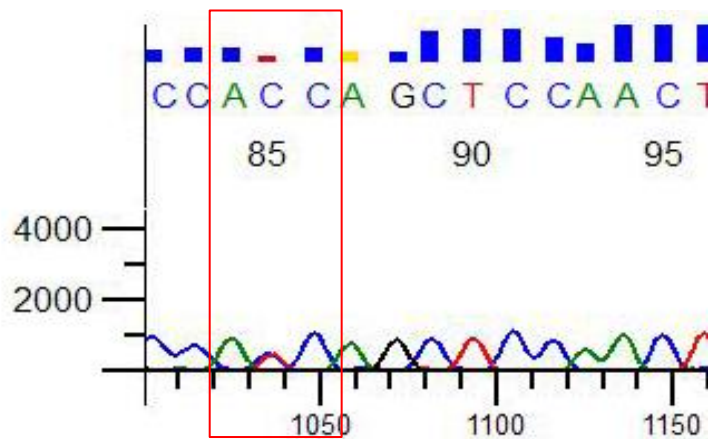

YPAC-26

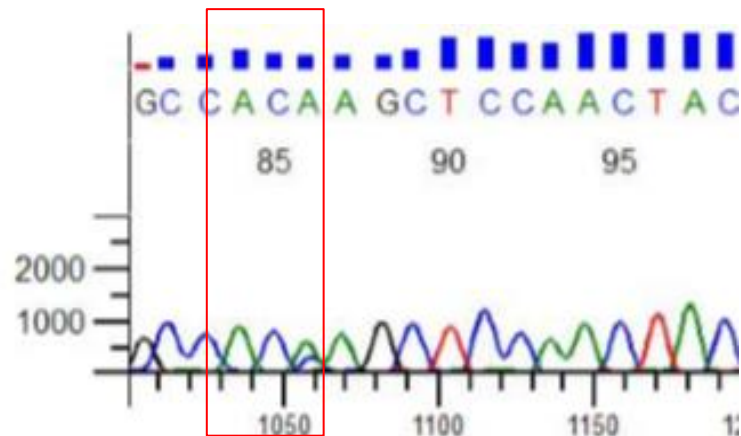

YPAC-25

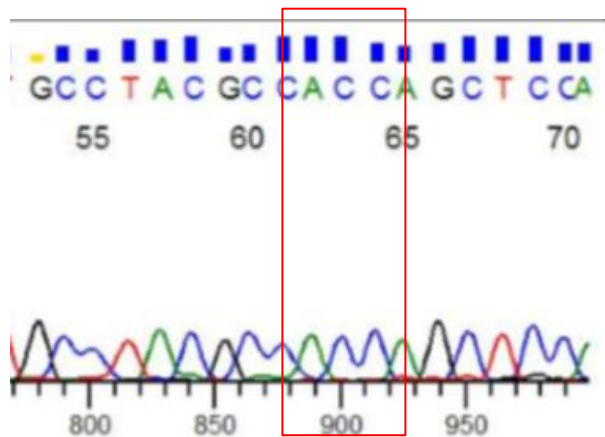

YPAC-27

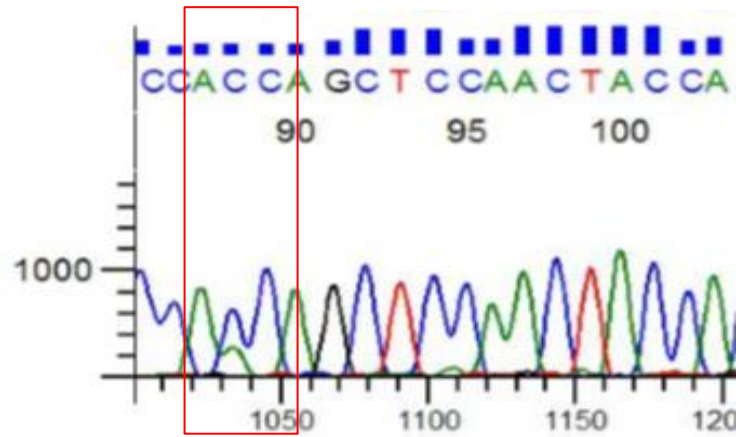

YPAC-27

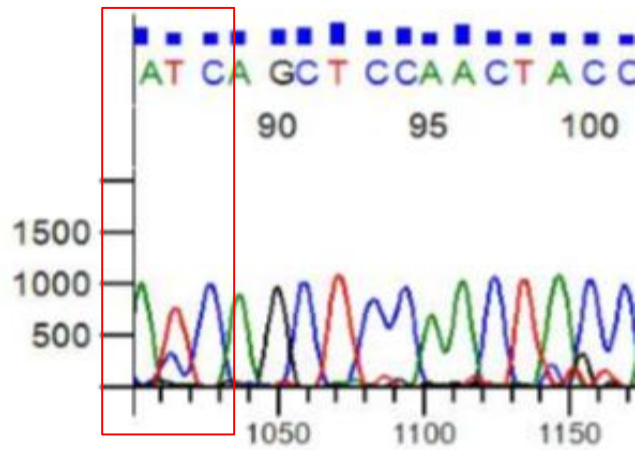

YPAC-30

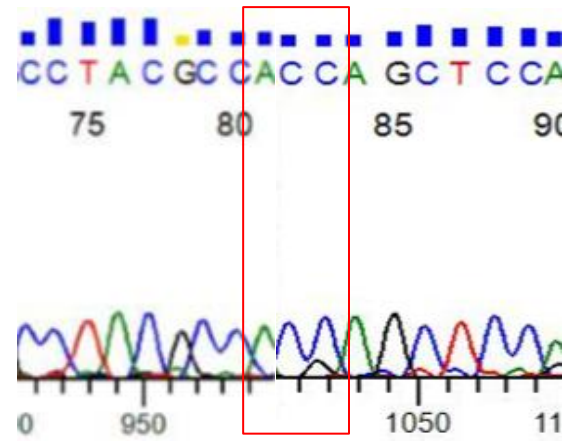

YPAC-28

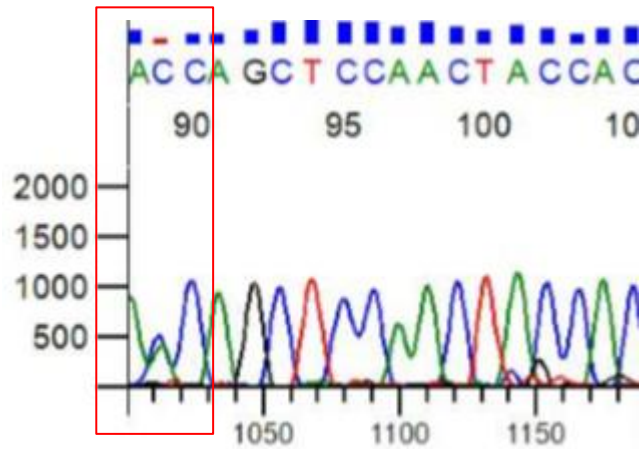

YPAC-32

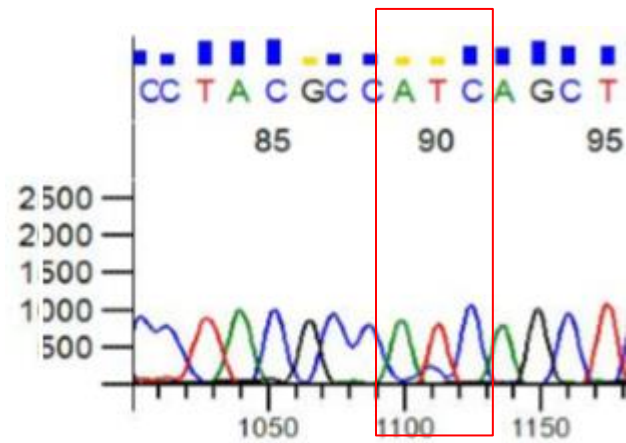

YPAC-33

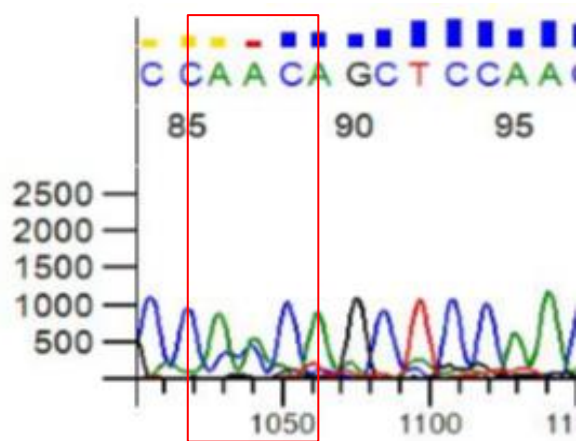

YPAC-35

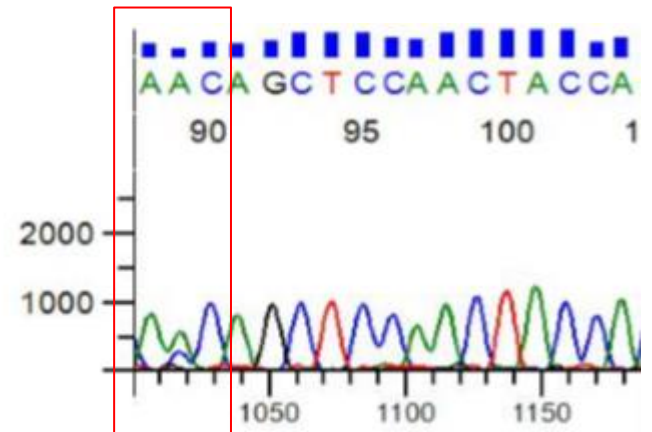

YPAC-34

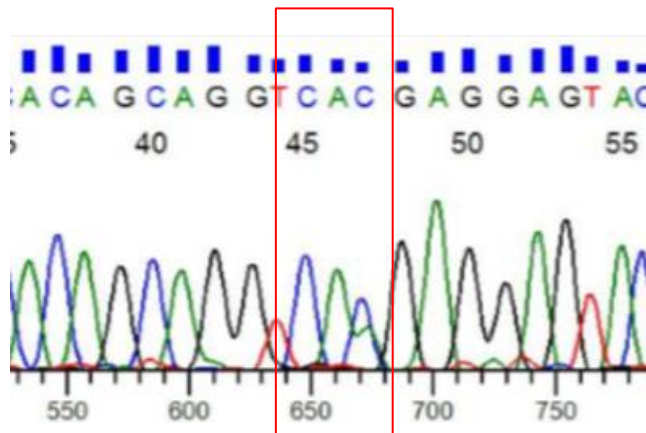

YPAC-37

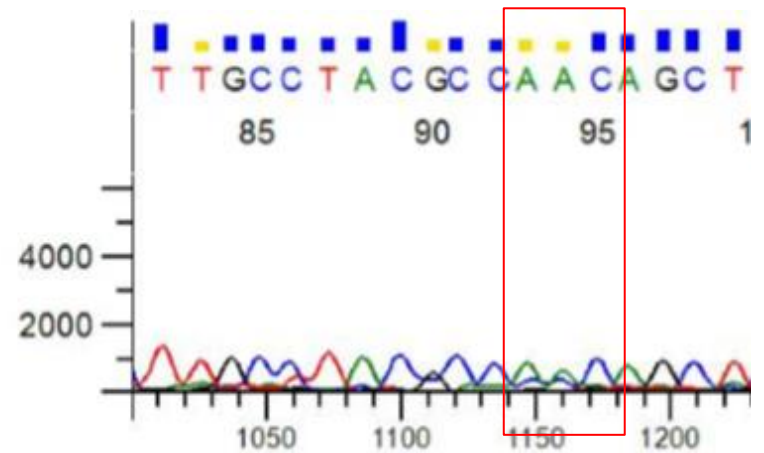

YPAC-39

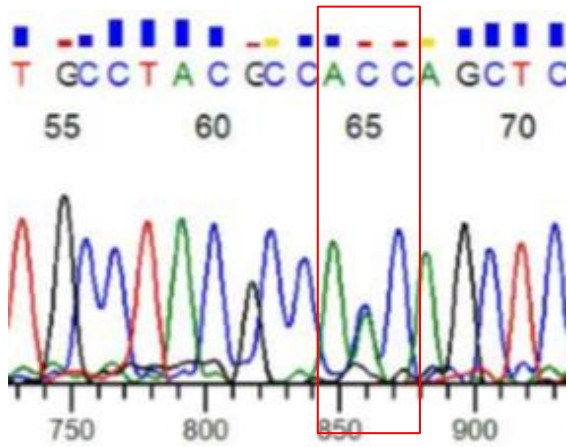

YPAC-44

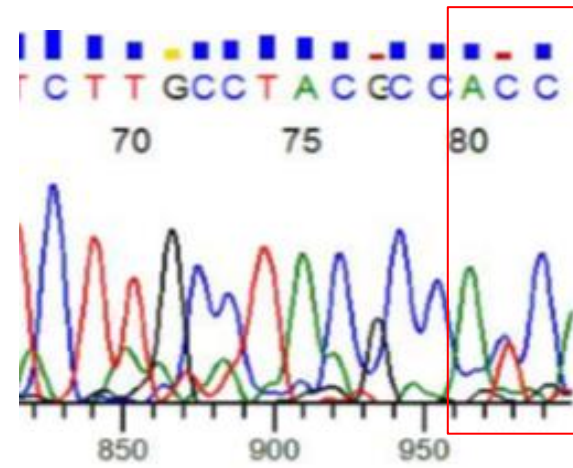

YPAC-43

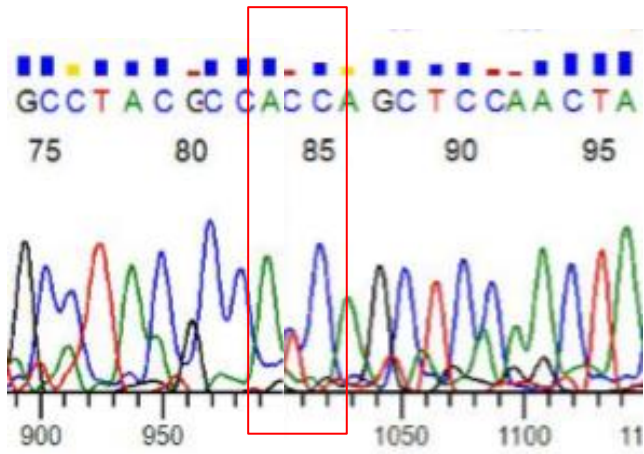

YPAC-46

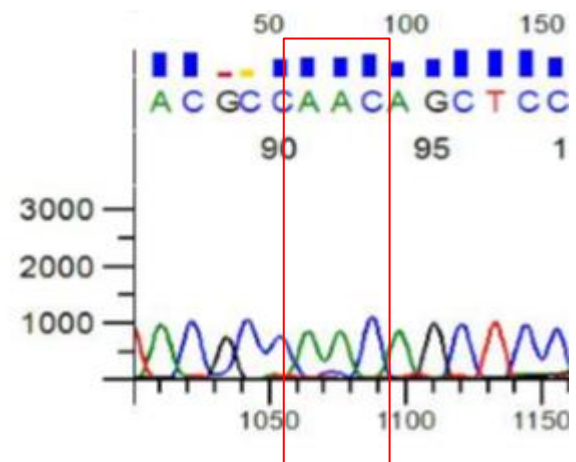

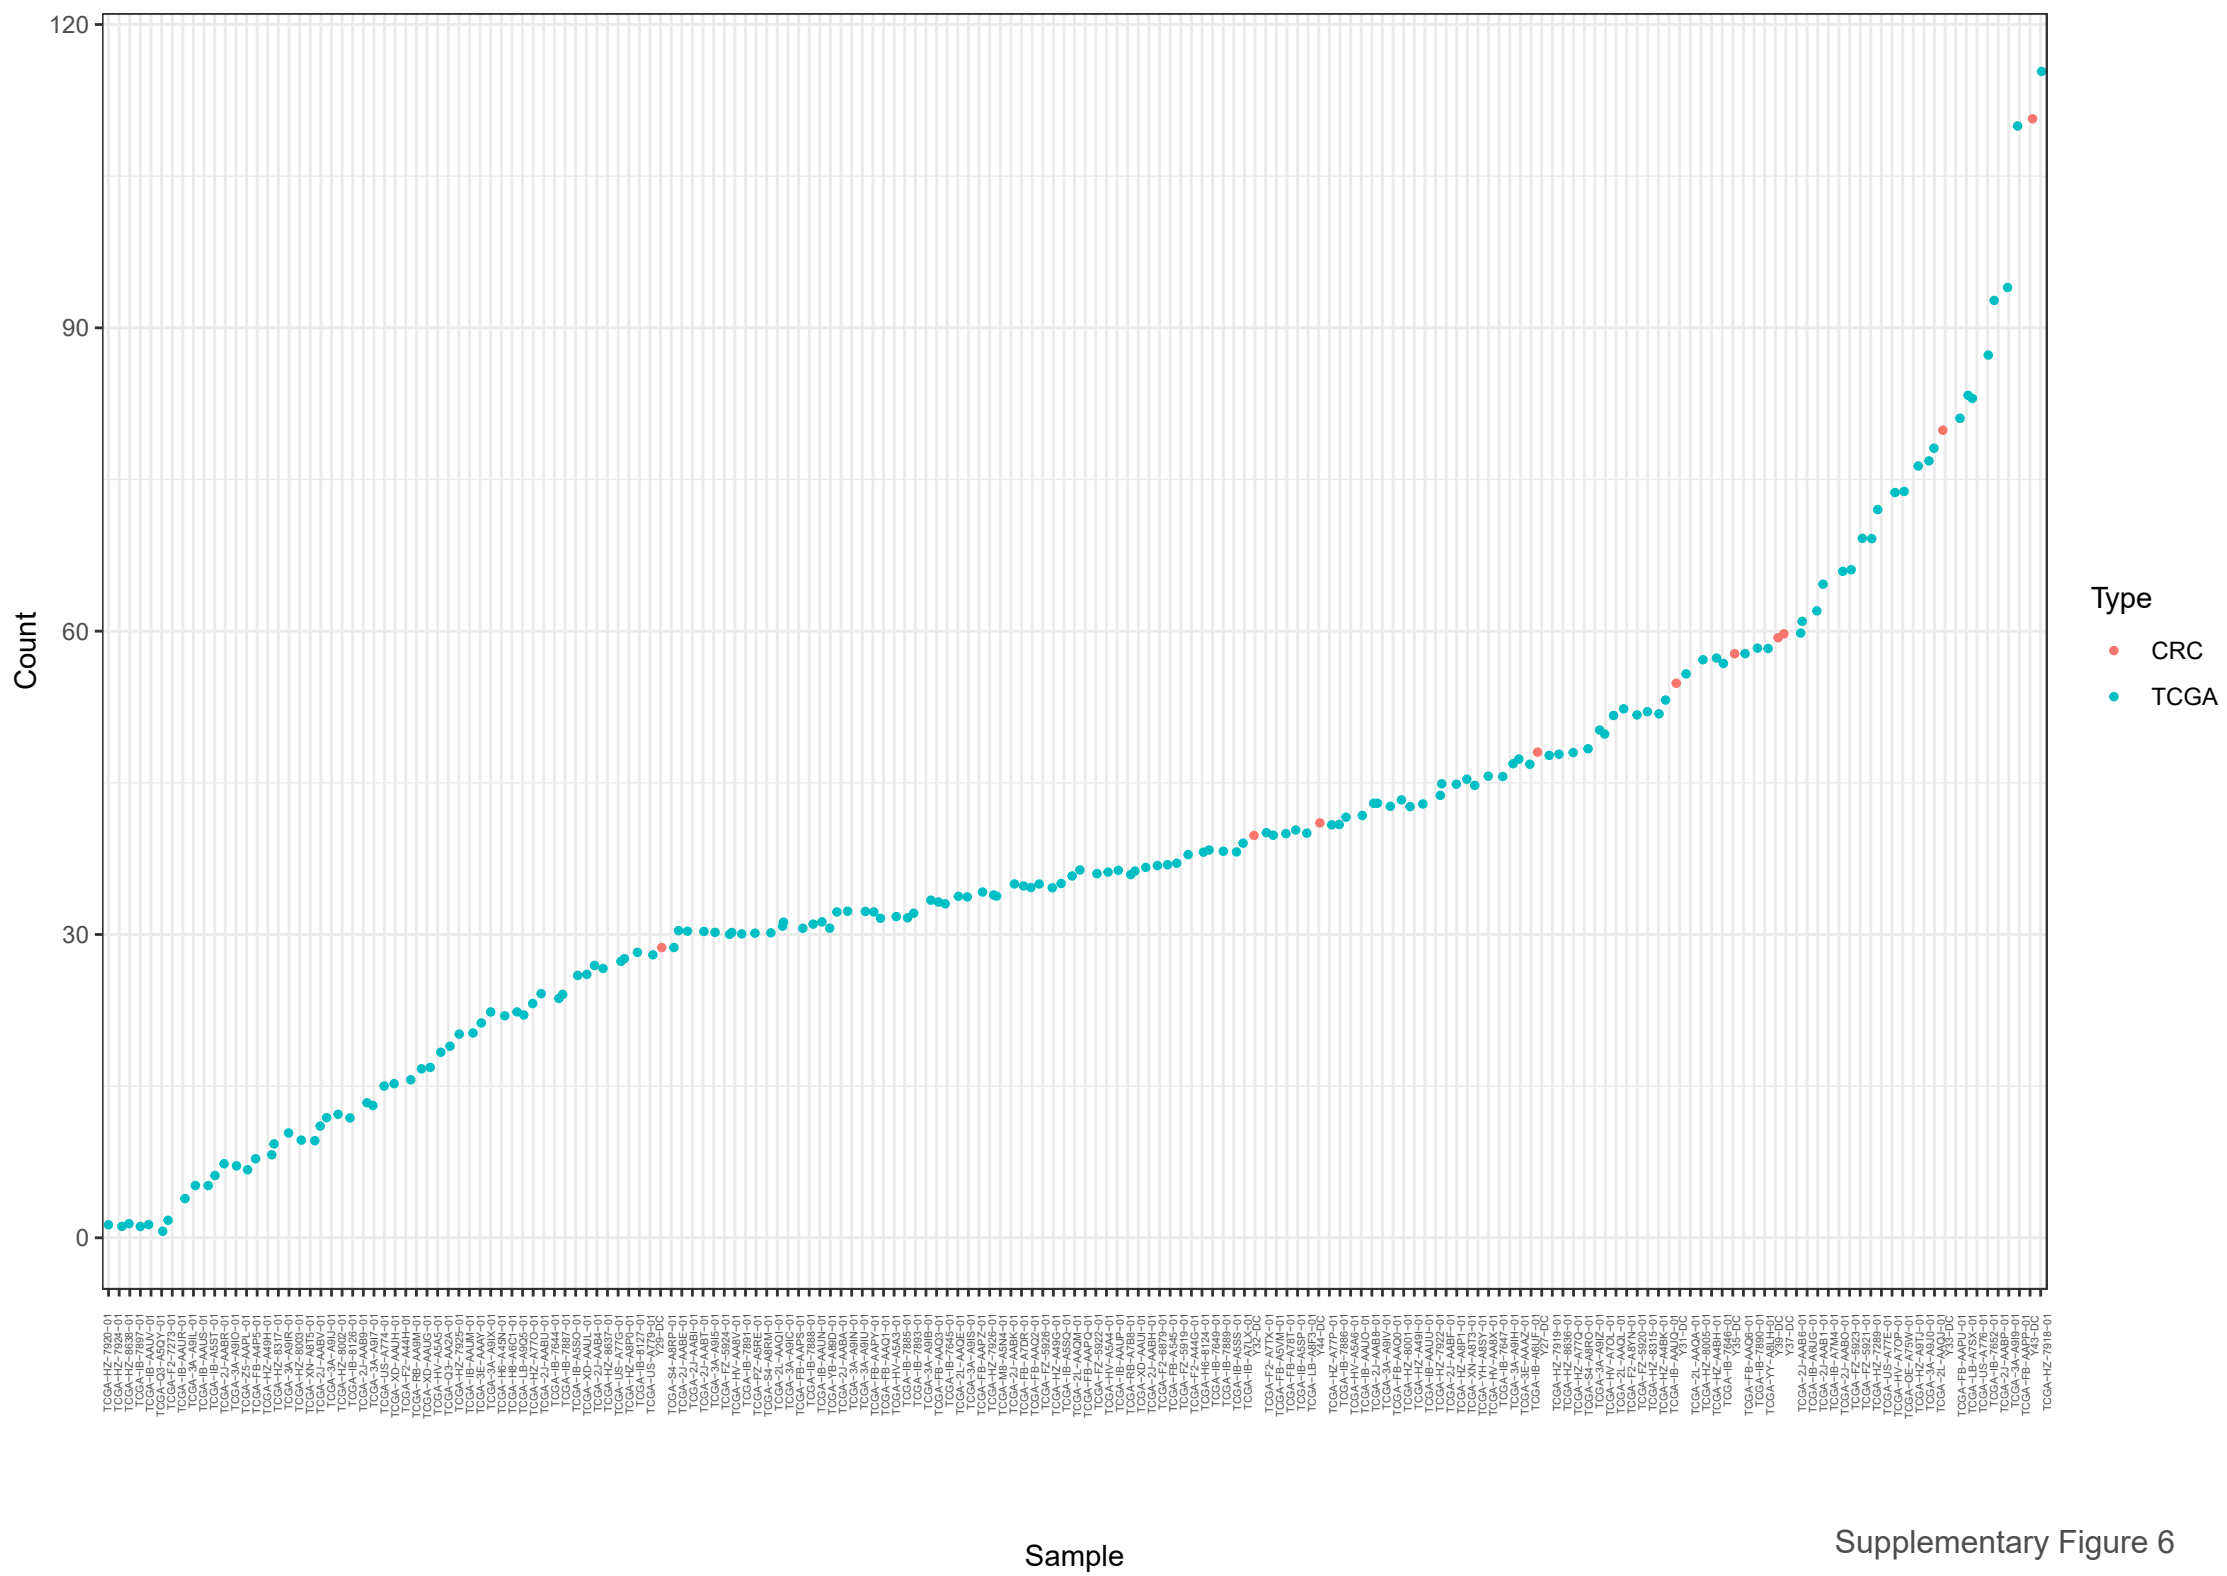

Supplementary figure 7

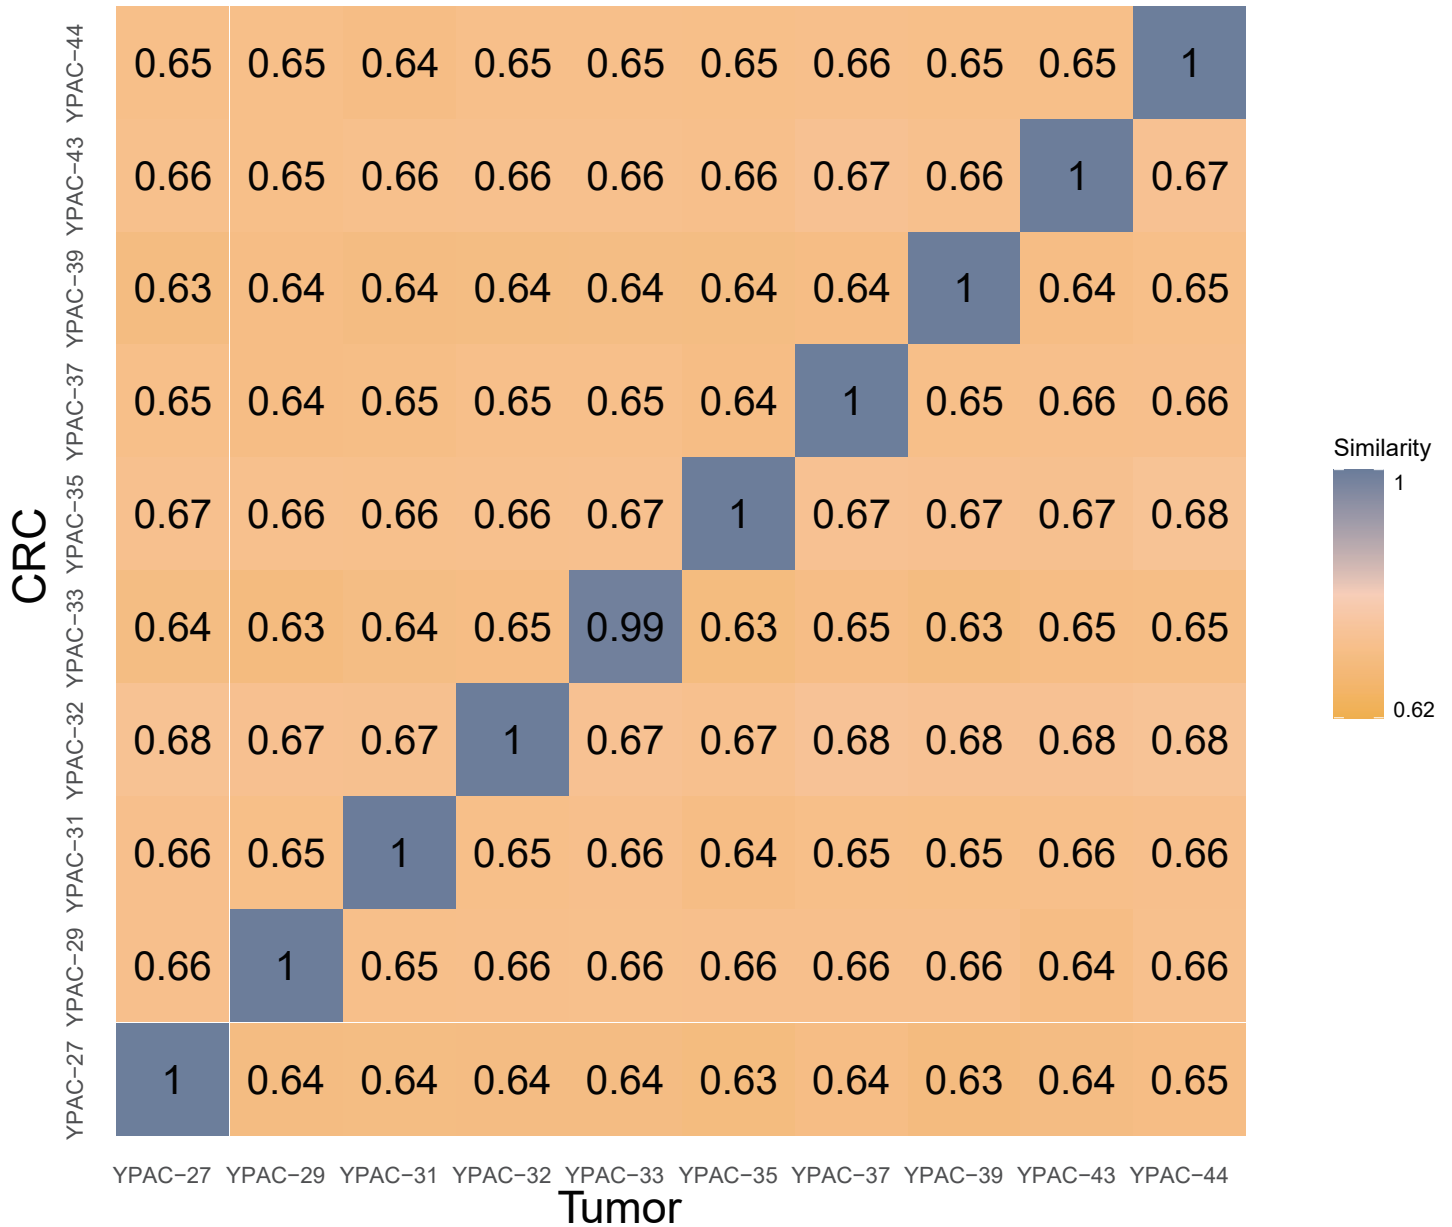



Supplementary figure 8

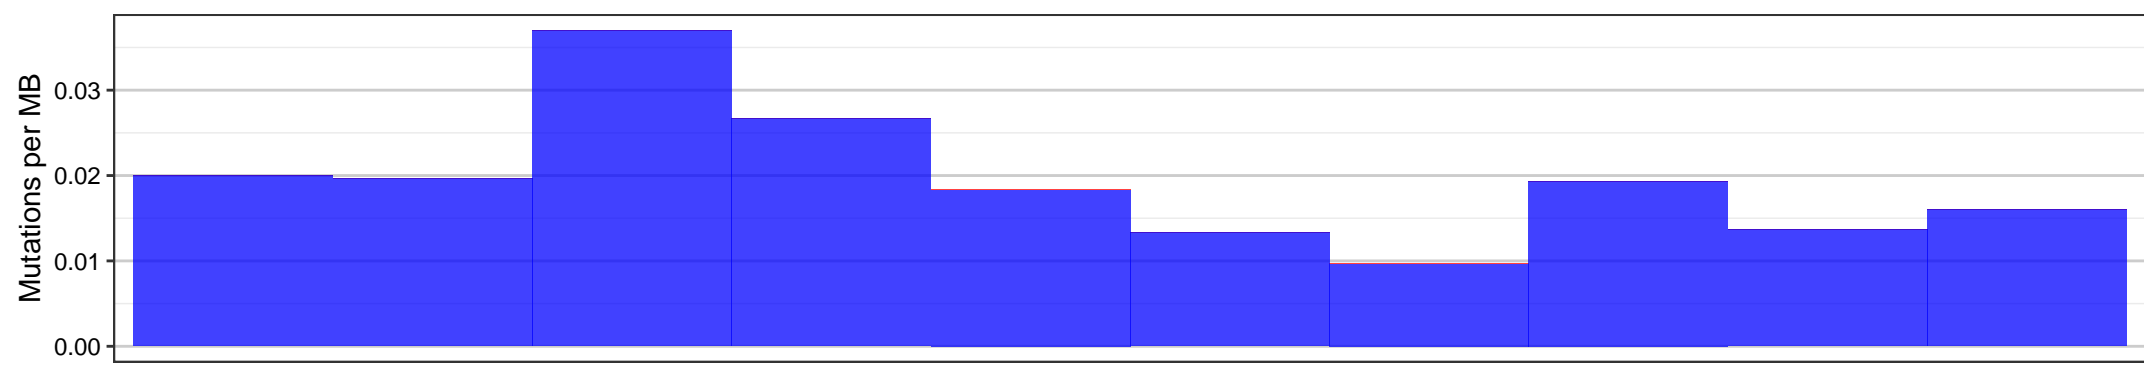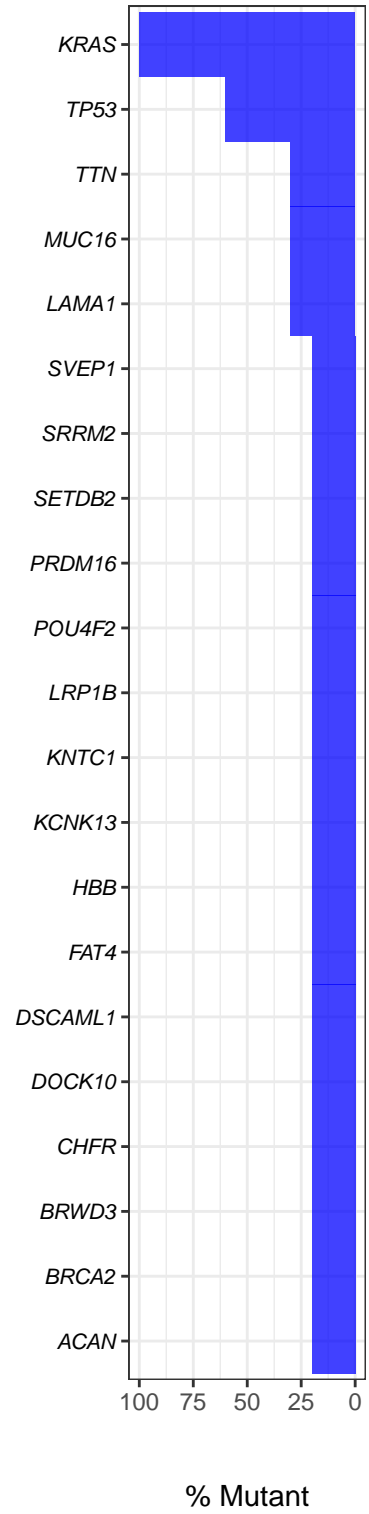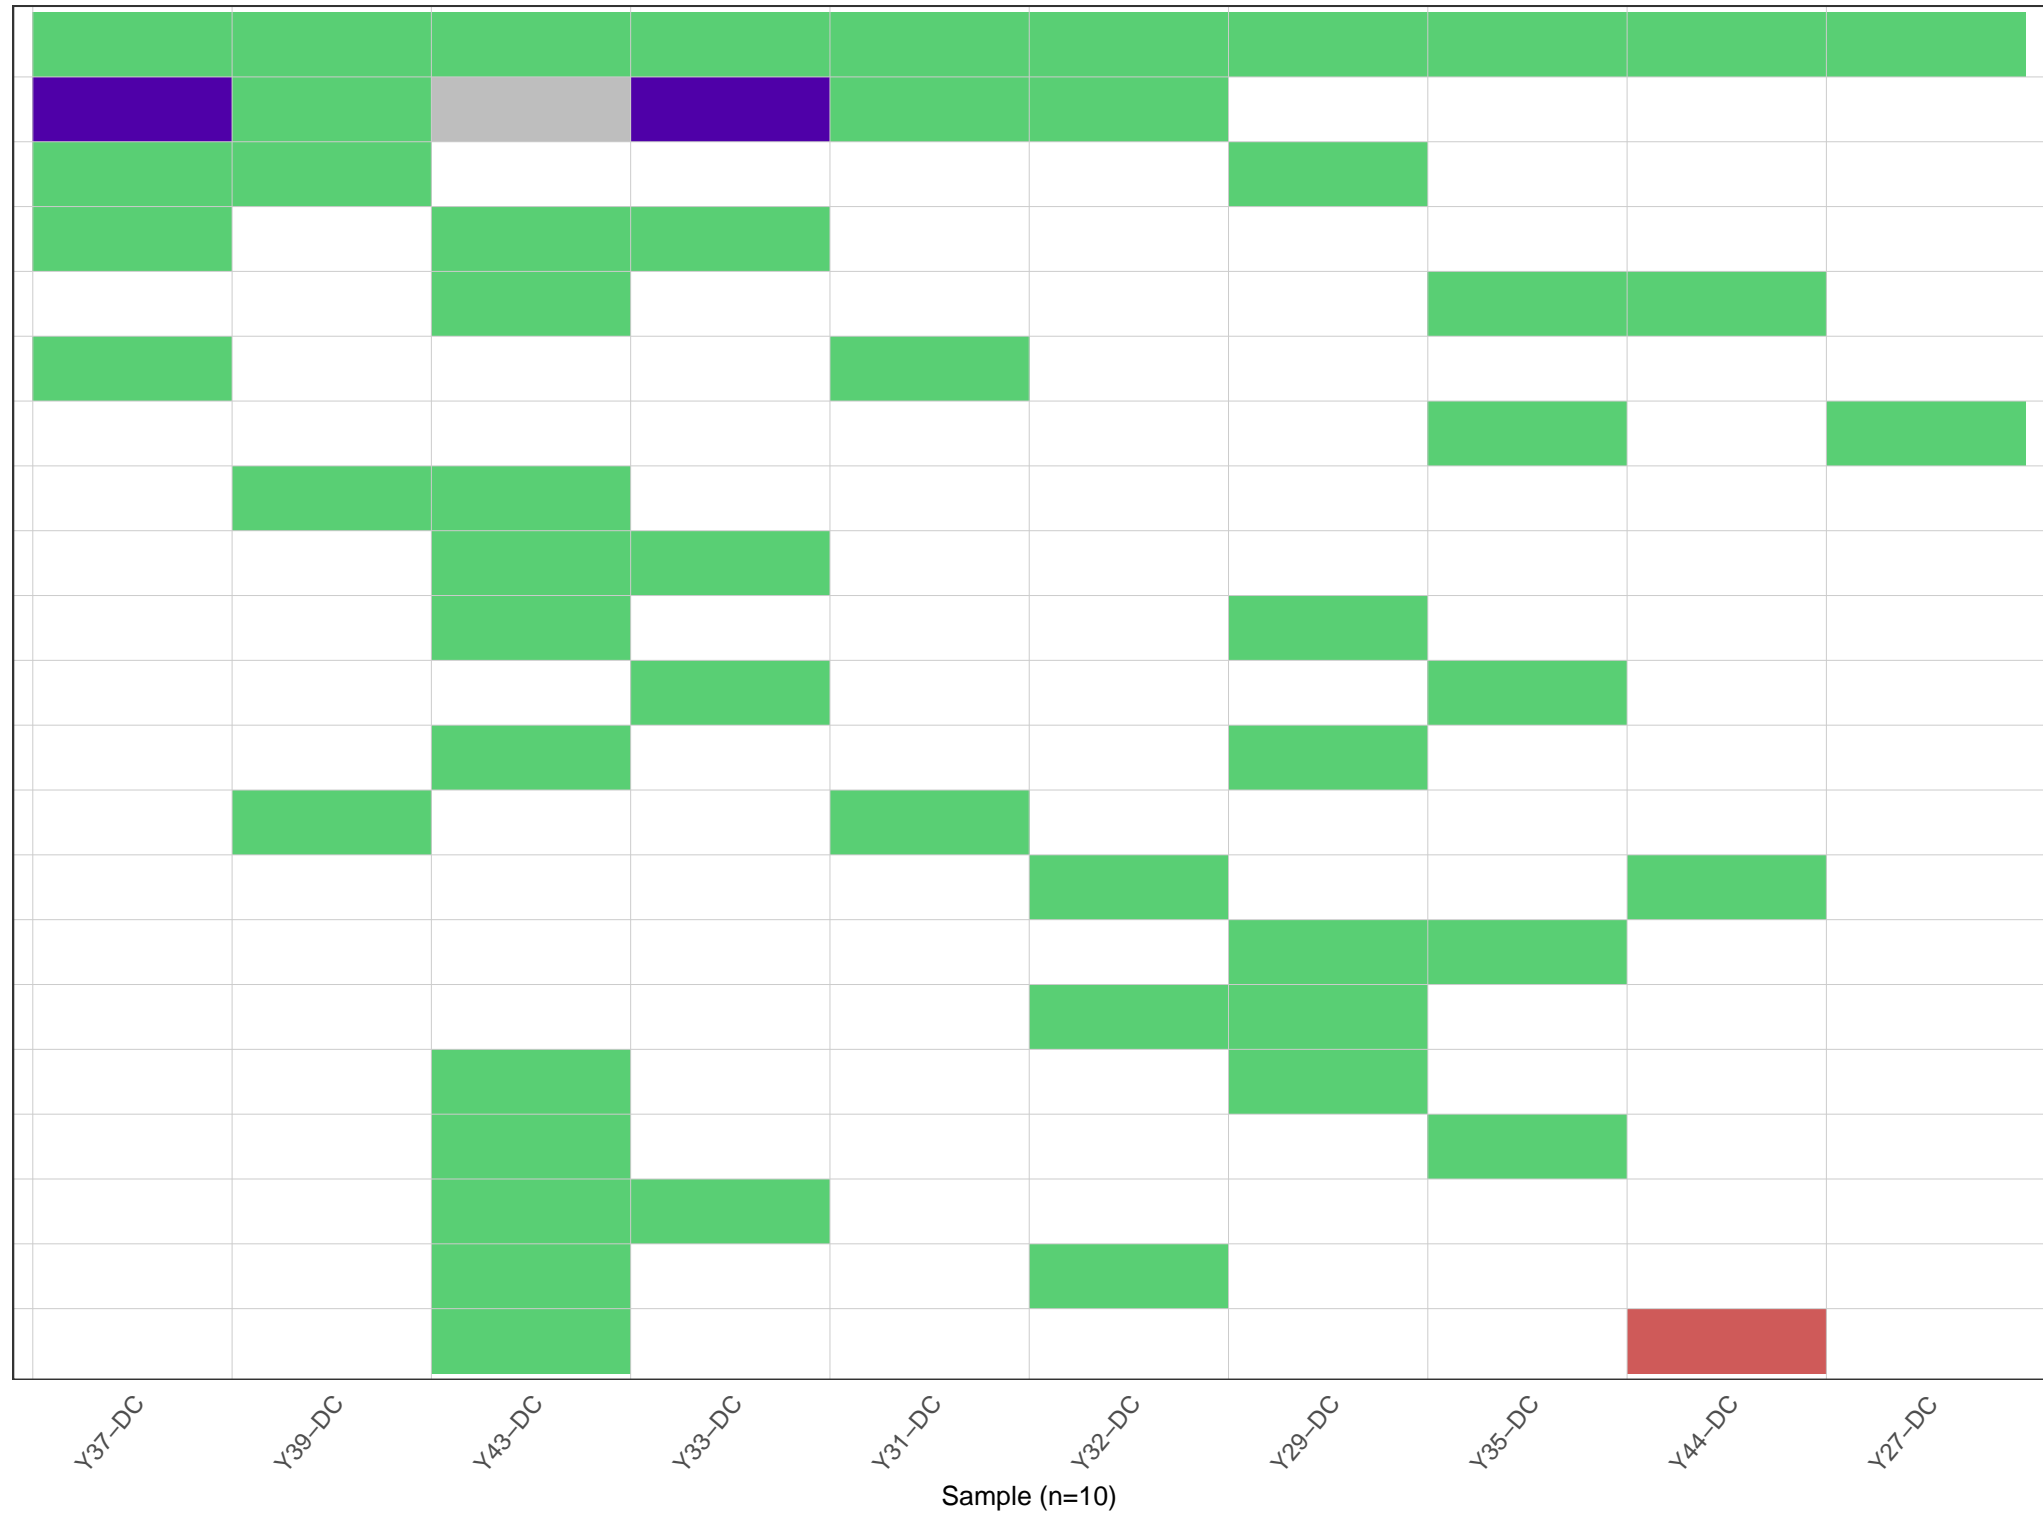

YPAC-2

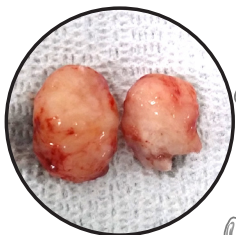

YPAC-5

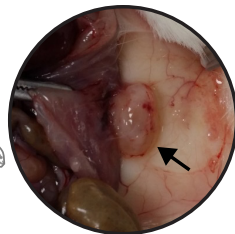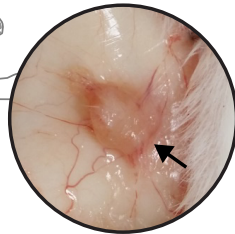

YPAC-21

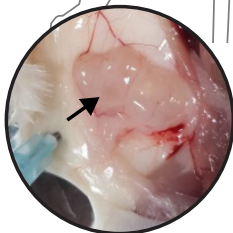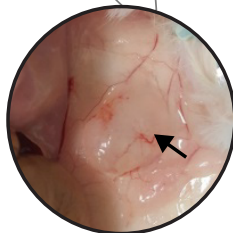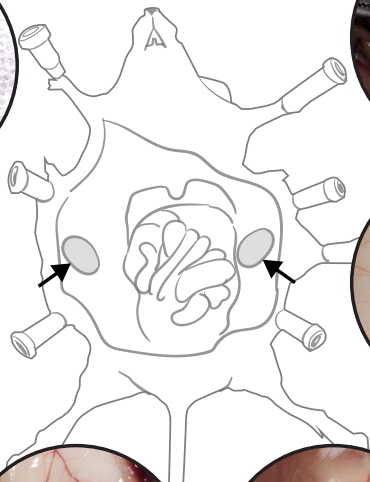

YPAC-2

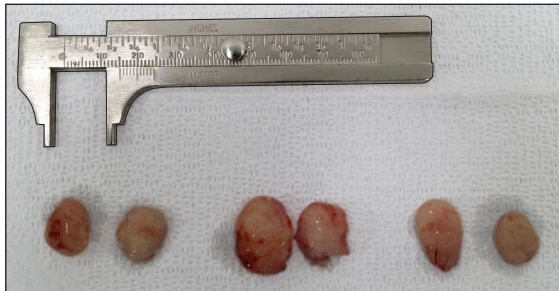

YPAC-5

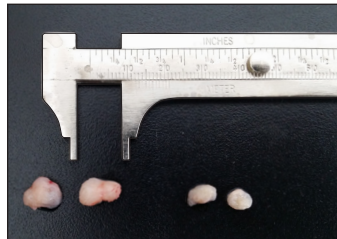

YPAC-21

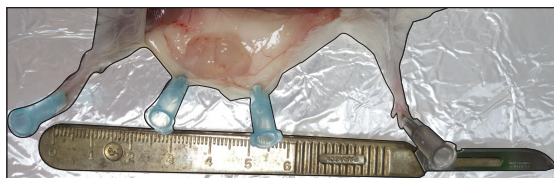

Supplementary Figure 10

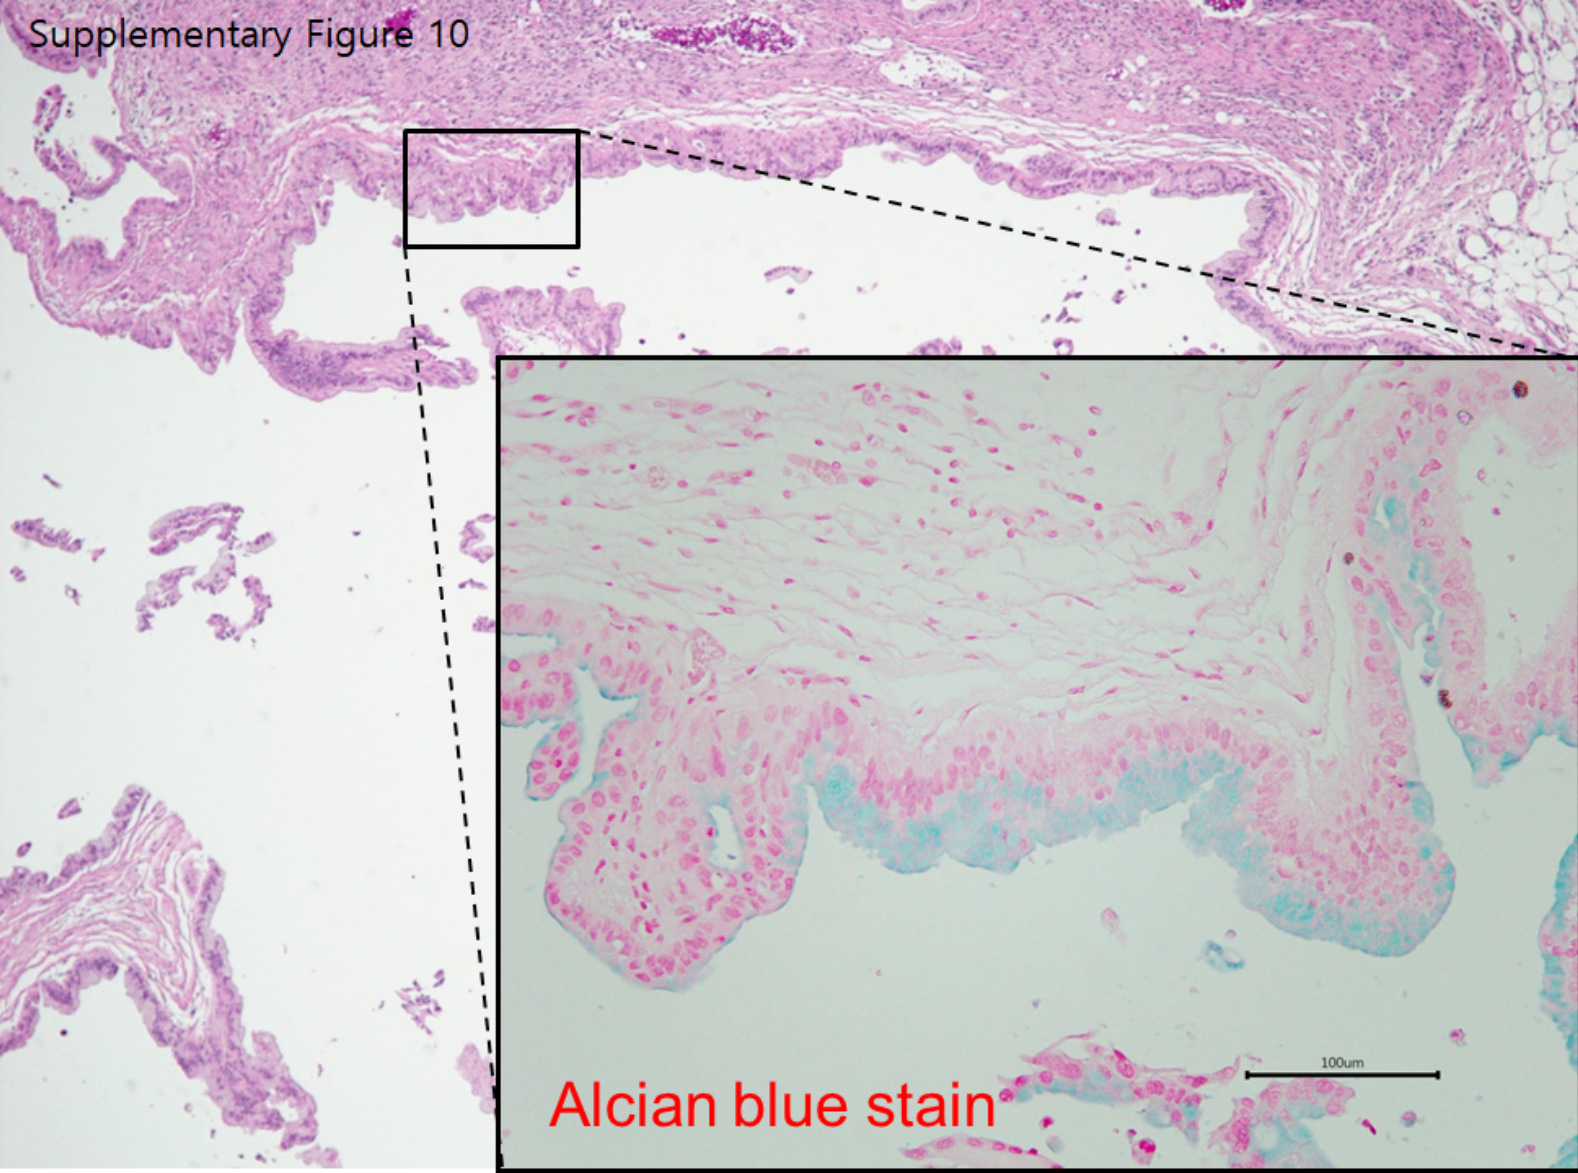

### KRAS missense variants p.G12R

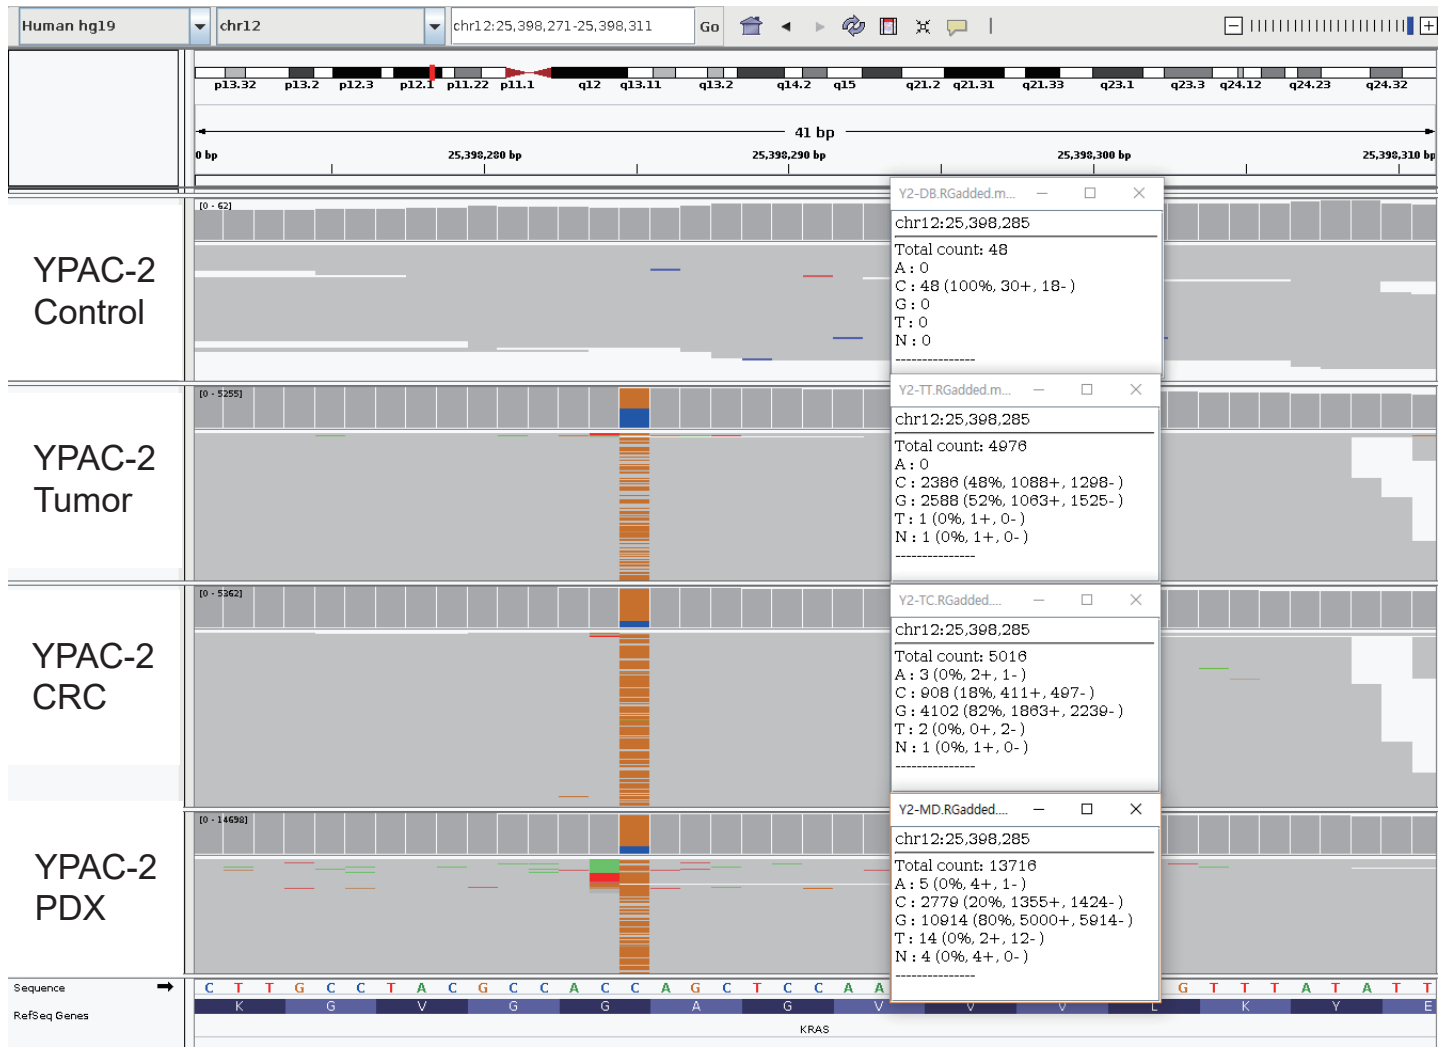

Supplementary figure 12

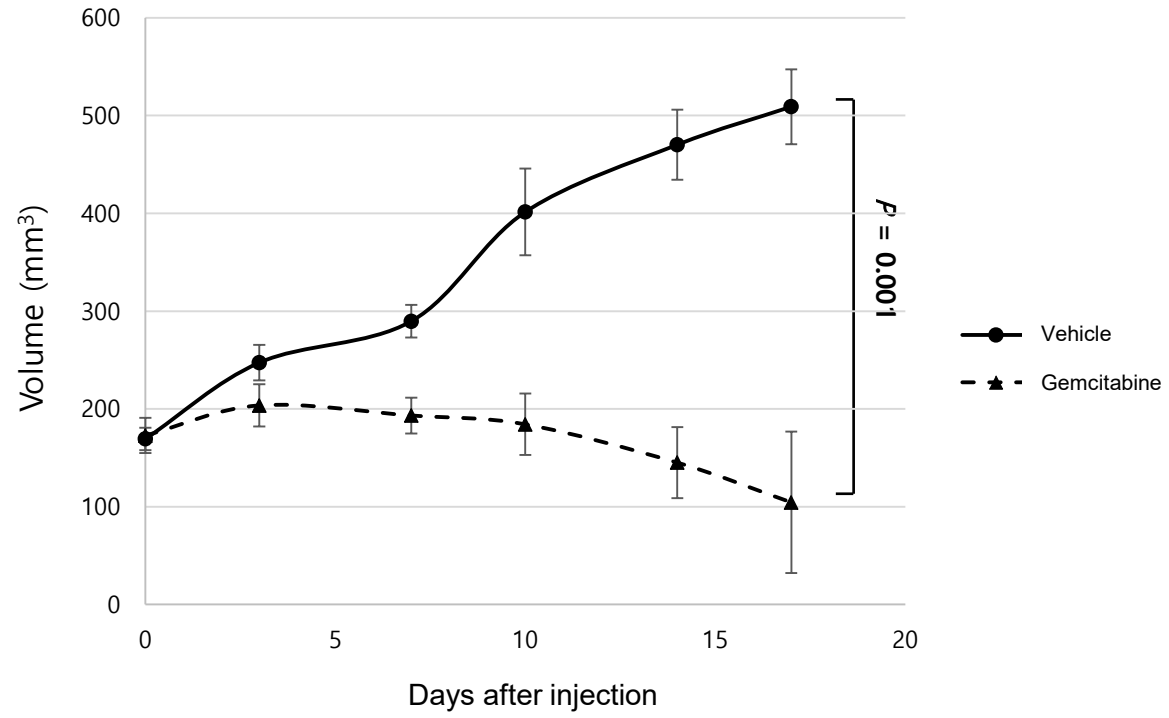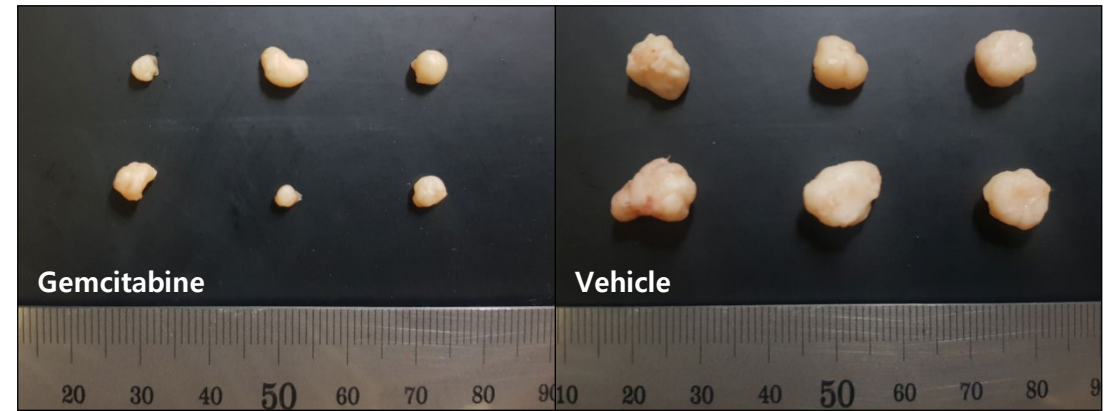

a

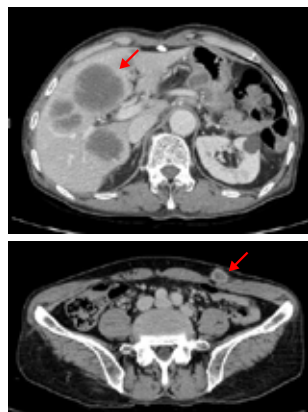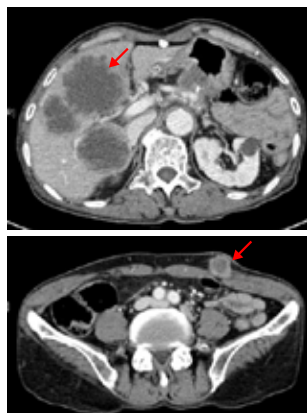

**YPAC-02**  
**PFS 65 days.**  
**BR: PD**

**YPAC-02 (Resistant)**

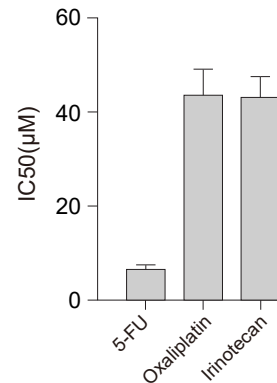

Liver metastasis  
 1st FOLFIRINOX

4th FOLFIRINOX

b

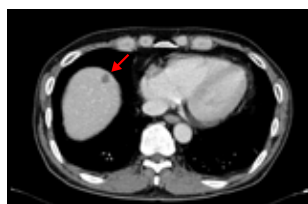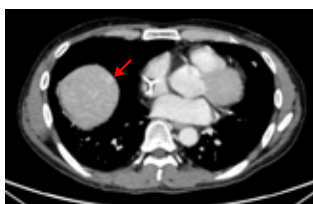

**YPAC-25**  
**PFS 360 days.**  
**BR: PR**

**YPAC-25 (Sensitive)**

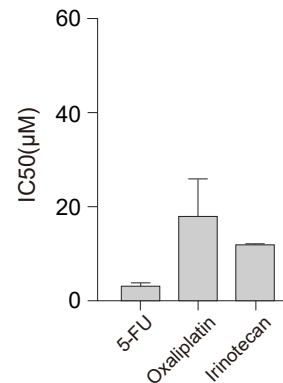

Disease recurrence  
 1st FOLFIRINOX

20th FOLFIRINOX
