# Supplementary material for: Profiling of conditionally reprogrammed cell lines for in vitro chemotherapy response prediction of pancreatic cancer
Source: PubMed Central journal article supplement — eBioMedicine. 2021 Feb 25;65:103218. doi: 10.1016/j.ebiom.2021.103218 (PMC7921470; doi:10.1016/j.ebiom.2021.103218), 2021-02-25
Supplement: mmc3.pdf [file mmc3.pdf]

Supplementary Table 1. Panel of 83 targeted genes.

|        |         |       |        |         |
|--------|---------|-------|--------|---------|
| ABL1   | BRCA2   | FGFR2 | KIT    | PTCH1   |
| AKT1   | CDH1    | FGFR3 | KRAS   | PTCH2   |
| AKT2   | CDK4    | FLT3  | MDM2   | PTEN    |
| AKT3   | CDK6    | GNA11 | MET    | PTPN11  |
| ALK    | CDKN2A  | GNAQ  | MLH1   | RB1     |
| APC    | CSF1R   | GNAS  | MPL    | RET     |
| ARID1A | CTNNB1  | HNF1A | MTOR   | ROS1    |
| ARID1B | DDR2    | HRAS  | NF1    | SMAD4   |
| ARID2  | EGFR    | IDH1  | NOTCH1 | SMARCB1 |
| ATM    | EPHB4   | IDH2  | NPM1   | SMO     |
| ATRX   | ERBB2   | IGF1R | NRAS   | SRC     |
| AURKA  | ERBB3   | ITK   | NTRK1  | STK11   |
| AURKB  | ERBB4   | JAK1  | PDGFRA | SYK     |
| BCL2   | EZH2    | JAK2  | PDGFRB | TOP1    |
| BRAF   | FBXW7   | JAK3  | PIK3CA | TP53    |
| BRCA1  | FGFR1   | KDR   | PIK3R1 | VHL     |
| EWSR1  | TMPRSS2 | TERT  |        |         |

Supplementary Table 2. Patient list and characteristics

| Sample              | Age  | Sex | Tumor location | Tumor size (cm) | Tissue acquisition site | Tissue acquisition method | Final pathology                                            | Differentiation | KRAS     | position        |
|---------------------|------|-----|----------------|-----------------|-------------------------|---------------------------|------------------------------------------------------------|-----------------|----------|-----------------|
| YPAC-2, YPAC2-PDX   | M 65 |     | Tail           | 2               | Liver                   | EUS biopsy                | pancreatic ductal adenocarcinoma                           | MD              | GGT->GGT | p.Gly12Arg G12R |
| YPAC-5, YPAC5-PDX   | M 48 |     | head           | 5               | Pancreas                | Surgery                   | undifferentiated carcinoma with osteoclast-like giant cell | N/A             | GGT->GAT | p.Gly12Asp G12D |
| YPAC-6              | F 73 |     | tail           | 3.2             | Pancreas                | Surgery                   | pancreatic ductal adenocarcinoma                           | MD              | GGT->GTT | p.Gly12Val G12V |
| YPAC-7              | F 75 |     | head           | 4               | Pancreas                | Surgery                   | pancreatic ductal adenocarcinoma                           | PD              | N/A*     | N/A             |
| YPAC-10             | F 67 |     | head           | 1.2             | Pancreas                | Surgery                   | pancreatic ductal adenocarcinoma                           | MD              | GGT->GTT | p.Gly12Arg G12R |
| YPAC-13             | M 69 |     | head           | 2.7             | Pancreas                | Surgery                   | pancreatic ductal adenocarcinoma                           | MD              | GGT->GTT | p.Gly12Val G12V |
| YPAC-15             | F 61 |     | tail           | 7               | Pancreas                | EUS-FNB                   | pancreatic ductal adenocarcinoma                           | PD              | GGT->GTT | p.Gly12Val G12V |
| YPAC-16             | M 53 |     | head           | 2               | Pancreas                | EUS-FNB                   | pancreatic ductal adenocarcinoma                           | N/A             | GGT->GAT | p.Gly12Asp G12D |
| YPAC-17             | M 65 |     | body           | 2.4             | Pancreas                | Surgery                   | pancreatic ductal adenocarcinoma                           | MD              | GGT->GTT | p.Gly12Val G12V |
| YPAC-20             | M 55 |     | body           | 1.8             | Pancreas                | Surgery                   | pancreatic ductal adenocarcinoma                           | MD              | GGT->GAT | p.Gly12Asp G12D |
| YPAC-21, YPAC21-PDX | F 80 |     | tail           | 3.5             | Pancreas                | EUS-FNB                   | N/A**                                                      | N/A             | GGT->GAT | p.Gly12Asp G12D |
| YPAC-23             | F 81 |     | head           | 3.4             | Pancreas                | Surgery                   | pancreatic ductal adenocarcinoma                           | MD              | GGT->GAT | p.Gly12Asp G12D |
| YPAC-25             | M 54 |     | tail           | 2.7             | Pancreas                | Surgery                   | pancreatic ductal adenocarcinoma                           | MD              | N/A      | N/A             |
| YPAC-26             | M 57 |     | head           | 1.8             | Pancreas                | EUS-FNB                   | pancreatic ductal adenocarcinoma                           | WD              | GGT->TGT | p.Gly12Cys G12C |
| YPAC-27             | F 66 |     | head           | 2.8             | Pancreas                | Surgery                   | pancreatic ductal adenocarcinoma                           | PD              | GGT->GTT | p.Gly12Val G12V |
| YPAC-28             | F 71 |     | tail           | 3.7             | Pancreas                | EUS-FNB                   | pancreatic ductal adenocarcinoma                           | MD              | GGT->GTT | p.Gly12Val G12V |
| YPAC-29             | M 63 |     | body           | 3.6             | Pancreas                | EUS-FNB                   | pancreatic ductal adenocarcinoma                           | MD              | GGT->GAT | p.Gly12Asp G12D |
| YPAC-30             | M 59 |     | body           | 6               | Pancreas                | EUS-FNB                   | pancreatic ductal adenocarcinoma                           | N/A             | GGT->CGT | p.Gly12Arg G12R |
| YPAC-31             | M 62 |     | head           | 5.5             | Pancreas                | EUS-FNB                   | pancreatic ductal adenocarcinoma                           | N/A             | GGT->GAT | p.Gly12Asp G12D |
| YPAC-32             | F 58 |     | head           | 2.2             | Pancreas                | Surgery                   | pancreatic ductal adenocarcinoma                           | MD              | GGT->GTT | p.Gly12Val G12V |
| YPAC-33             | M 67 |     | tail           | 7.4             | Pancreas                | EUS-FNB                   | pancreatic ductal adenocarcinoma                           | N/A             | GGT->GTT | p.Gly12Val G12V |
| YPAC-34             | M 62 |     | head           | 2.7             | Pancreas                | EUS-FNB                   | pancreatic ductal adenocarcinoma                           | PD              | CAA->CAC | p.Gln61His Q61H |
| YPAC-35             | M 79 |     | body           | 14.9            | Pancreas                | EUS-FNB                   | pancreatic ductal adenocarcinoma                           | PD              | GGT->GTT | p.Gly12Val G12V |
| YPAC-37             | F 61 |     | body           | 6               | Pancreas                | EUS-FNB                   | pancreatic ductal adenocarcinoma                           | N/A             | GGT->GTT | p.Gly12Val G12V |
| YPAC-39             | M 62 |     | body           | 2.7             | Pancreas                | Surgery                   | pancreatic ductal adenocarcinoma                           | MD              | GGT->GTT | p.Gly12Val G12V |
| YPAC-43             | F 51 |     | body           | 4.1             | Pancreas                | EUS-FNB                   | pancreatic ductal adenocarcinoma                           | MD              | GGT->GAT | p.Gly12Asp G12D |
| YPAC-44             | F 74 |     | body           | 1.8             | Pancreas                | EUS-FNB                   | pancreatic ductal adenocarcinoma                           | N/A             | GGT->GAT | p.Gly12Asp G12D |
| YPAC-46             | M 72 |     | head           | 2.5             | Pancreas                | EUS-FNB                   | pancreatic ductal adenocarcinoma                           | N/A             | GGT->GTT | p.Gly12Val G12V |

EUS-FNB, Endoscopic ultrasound guided fine needle biopsy

WD, well differentiation; MD, moderate differentiation; PD, poorly differentiation

N/A, not applicable

\*, KRAS was confirmed with targeted sequencing. But sanger sequencing was not performed due to low amount of DNA.

\*\*, Final pathology was not confirmed in YPAC-21 because primary biopsy did not show the presence of atypical cell and second biopsy was impossible due to old age. But, computed tomography image and tumor marker showed pancreatic ductal adenocarcinoma

Supplementary Table 3. Sample information

| Patient | Control      |               | PrimaryTumor |               |                    | CRC          |               |                    |
|---------|--------------|---------------|--------------|---------------|--------------------|--------------|---------------|--------------------|
|         | Mapping Rate | Mapping Depth | Mapping Rate | Mapping Depth | Contamination Rate | Mapping Rate | Mapping Depth | Contamination Rate |
| YPAC-2  | 99.62%       | 28.54         | 99.77%       | 2037.79       | <b>0.10%</b>       | 99.90%       | 1181.78       | <b>0.10%</b>       |
| YPAC-5  | 99.80%       | 50.48         | 99.49%       | 1773.5        | <b>0.10%</b>       | 99.92%       | 1304.72       | <b>0.50%</b>       |
| YPAC-6  | 99.80%       | 41.38         | 99.51%       | 1842.09       | <b>0.10%</b>       | 99.89%       | 774.65        | <b>0.20%</b>       |
| YPAC-10 | 99.86%       | 63.95         | 99.52%       | 1175.57       | <b>0.10%</b>       | 99.88%       | 1818.42       | <b>0.10%</b>       |
| YPAC-13 | 87.10%       | 88.87         | 99.70%       | 912.38        | <b>0.10%</b>       | 99.70%       | 982           | <b>0.10%</b>       |
| YPAC-15 | 99.96%       | 91.46         | 97.77%       | 2562.98       | <b>0.10%</b>       | 98.07%       | 2803.81       | <b>0.10%</b>       |
| YPAC-17 | 99.69%       | 45.67         | 99.66%       | 771           | <b>0.10%</b>       | 99.77%       | 974.9         | <b>0.10%</b>       |
| YPAC-23 | 99.42%       | 50.24         | 99.73%       | 985.92        | <b>0.10%</b>       | 99.77%       | 1064.17       | <b>0.10%</b>       |
| YPAC-26 | 99.97%       | 70.41         | 96.89%       | 2696.18       | <b>0.10%</b>       | 97.37%       | 2417.48       | <b>0.10%</b>       |

Supplementary Table 4. Single-nucleotide polymorphism list

| Sample  | Gene   | Chromosome | Position  | Reference | Alternate | Mutation Type                  | Primary Tumor    |                  | CRC              |
|---------|--------|------------|-----------|-----------|-----------|--------------------------------|------------------|------------------|------------------|
|         |        |            |           | Allele    | Allele    |                                | Allele Frequency | Allele Frequency | Allele Frequency |
| YPAC-02 | ATRX   | chrX       | 76763808  | C         | T         | 3_prime_UTR_variant            | 0.08             |                  | 0                |
| YPAC-02 | KRAS   | chr12      | 25398285  | C         | G         | missense_variant               | 0.53             |                  | 0.82             |
| YPAC-02 | TP53   | chr17      | 7578419   | C         | A         | stop_gained                    | 0.45             |                  | 1                |
| YPAC-05 | AKT1   | chr14      | 105236684 | C         | T         | synonymous_variant             | 0.18             |                  | 0.65             |
| YPAC-05 | BRAF   | chr7       | 140494246 | C         | T         | synonymous_variant             | 0.25             |                  | 0.61             |
| YPAC-05 | KRAS   | chr12      | 25398284  | C         | T         | missense_variant               | 0.87             |                  | 0.85             |
| YPAC-05 | TP53   | chr17      | 7578524   | G         | A         | stop_gained                    | 0.39             |                  | 0.99             |
| YPAC-06 | KRAS   | chr12      | 25398284  | C         | A         | missense_variant               | 0.13             |                  | 0.77             |
| YPAC-06 | NTRK1  | chr1       | 156846287 | C         | T         | synonymous_variant             | 0.08             |                  | 0.19             |
| YPAC-06 | TP53   | chr17      | 7577094   | G         | A         | missense_variant               | 0.15             |                  | 0.96             |
| YPAC-10 | ARID1A | chr1       | 27087535  | CG        | C         | frameshift_variant             | 0.11             |                  | 0.5              |
| YPAC-10 | KRAS   | chr12      | 25398285  | C         | G         | missense_variant               | 0.12             |                  | 0.44             |
| YPAC-10 | NRAS   | chr1       | 115251293 | G         | GA        | intron_variant                 | 0.1              |                  | 0.5              |
| YPAC-10 | SMAD4  | chr18      | 48581304  | C         | CA        | frameshift_variant             | 0.11             |                  | 0.91             |
| YPAC-10 | TP53   | chr17      | 7577120   | C         | T         | missense_variant               | 0.12             |                  | 0.91             |
| YPAC-13 | CDKN2A | chr9       | 21974695  | G         | GT        | frameshift_variant&stop_gained | 0.24             |                  | 0.5              |
| YPAC-13 | KRAS   | chr12      | 25398284  | C         | A         | missense_variant               | 0.27             |                  | 0.49             |
| YPAC-13 | SMAD4  | chr18      | 48584513  | TG        | T         | frameshift_variant             | 0.23             |                  | 0.54             |
| YPAC-13 | TP53   | chr17      | 7578190   | T         | C         | missense_variant               | 0.22             |                  | 0.53             |
| YPAC-15 | ERBB4  | chr2       | 212495336 | GA        | G         | intron_variant,                | 0.01             |                  | 0.07             |
| YPAC-15 | GNAQ   | chr9       | 80646047  | G         | A         | synonymous_variant             | 0.05             |                  | 0.07             |
| YPAC-15 | KIT    | chr4       | 55593762  | G         | A         | intron_variant                 | 0.06             |                  | 0.13             |
| YPAC-15 | KRAS   | chr12      | 25398284  | C         | A         | missense_variant               | 0.78             |                  | 0.92             |
| YPAC-15 | TP53   | chr17      | 7578263   | G         | A         | stop_gained                    | 0.37             |                  | 0.97             |
| YPAC-17 | ARID1A | chr1       | 27094310  | GA        | G         | frameshift_variant             | 0.18             |                  | 0.5              |
| YPAC-17 | KRAS   | chr12      | 25398284  | C         | A         | missense_variant               | 0.19             |                  | 0.44             |
| YPAC-17 | NPM1   | chr5       | 170820024 | G         | A         | intron_variant                 | 0.33             |                  | 0.02             |
| YPAC-17 | SMAD4  | chr18      | 48603062  | C         | T         | stop_gained                    | 0.19             |                  | 0.93             |
| YPAC-17 | TP53   | chr17      | 7577599   | C         | CAA       | frameshift_variant             | 0.22             |                  | 0.96             |
| YPAC-23 | ARID2  | chr12      | 46230554  | C         | CT        | frameshift_variant             | 0.18             |                  | 0.51             |
| YPAC-23 | ATM    | chr11      | 108124566 | G         | T         | stop_gained                    | 0.17             |                  | 0.47             |
| YPAC-23 | CDKN2A | chr9       | 21971193  | G         | GC        | frameshift_variant             | 0.36             |                  | 1                |
| YPAC-23 | KDR    | chr4       | 55976689  | G         | A         | missense_variant               | 0.17             |                  | 0.5              |
| YPAC-23 | KRAS   | chr12      | 25398284  | C         | T         | missense_variant               | 0.18             |                  | 0.48             |
| YPAC-26 | KRAS   | chr12      | 25398285  | C         | A         | missense_variant               | 0.37             |                  | 0.68             |
| YPAC-26 | TP53   | chr17      | 7578370   | C         | A         | intron_variant,                | 0.35             |                  | 1                |

Supplementary Table 5. Copy number variant list

| <b>Sample</b> | <b>Gene</b> | <b>Primary Tumor<br/>Copy Number</b> | <b>CRC<br/>Copy Number</b> |
|---------------|-------------|--------------------------------------|----------------------------|
| YPAC-02       | ABL1        | 1.82                                 | 1.82                       |
| YPAC-02       | AKT1        | 2.18                                 | 2.38                       |
| YPAC-02       | AKT2        | 2.41                                 | 3.13                       |
| YPAC-02       | AKT3        | 2.21                                 | 2.32                       |
| YPAC-02       | ALK         | 2.2                                  | 2.1                        |
| YPAC-02       | APC         | 2.04                                 | 2.11                       |
| YPAC-02       | ARID1A      | 2.04                                 | 2.24                       |
| YPAC-02       | ARID1B      | 1.69                                 | 1.16                       |
| YPAC-02       | ARID2       | 1.97                                 | 1.14                       |
| YPAC-02       | ATM         | 2.12                                 | 2.46                       |
| YPAC-02       | ATRX        | 1.23                                 | 1.18                       |
| YPAC-02       | AURKA       | 2.13                                 | 2.16                       |
| YPAC-02       | AURKB       | 1.79                                 | 1.64                       |
| YPAC-02       | BCL2        | 1.73                                 | 1.72                       |
| YPAC-02       | BRAF        | 2.44                                 | 2.59                       |
| YPAC-02       | BRCA1       | 2                                    | 1.64                       |
| YPAC-02       | BRCA2       | 2.01                                 | 1.49                       |
| YPAC-02       | CDH1        | 1.8                                  | 1.63                       |
| YPAC-02       | CDK4        | 1.97                                 | 2.18                       |
| YPAC-02       | CDK6        | 2.44                                 | 2.59                       |
| YPAC-02       | CDKN2A      | 1.65                                 | 0.96                       |
| YPAC-02       | CSF1R       | 2.04                                 | 2.11                       |
| YPAC-02       | CTNNB1      | 1.96                                 | 1.66                       |
| YPAC-02       | DDR2        | 2.21                                 | 2.32                       |
| YPAC-02       | EGFR        | 3.03                                 | 3.2                        |
| YPAC-02       | EPHB4       | 2.44                                 | 2.59                       |
| YPAC-02       | ERBB2       | 2                                    | 1.64                       |
| YPAC-02       | ERBB3       | 1.97                                 | 2.18                       |
| YPAC-02       | ERBB4       | 2.45                                 | 2.7                        |
| YPAC-02       | EWSR1       | 2.07                                 | 2.29                       |
| YPAC-02       | EZH2        | 2.44                                 | 2.59                       |
| YPAC-02       | FBXW7       | 2.12                                 | 1.65                       |
| YPAC-02       | FGFR1       | 2.24                                 | 2.22                       |
| YPAC-02       | FGFR2       | 2.19                                 | 2.62                       |
| YPAC-02       | FGFR3       | 1.89                                 | 1.74                       |
| YPAC-02       | FLT3        | 2.01                                 | 1.49                       |
| YPAC-02       | GNA11       | 1.59                                 | 1.15                       |
| YPAC-02       | GNAQ        | 1.82                                 | 1.82                       |
| YPAC-02       | GNAS        | 2.13                                 | 2.16                       |

|         |         |      |      |
|---------|---------|------|------|
| YPAC-02 | HNF1A   | 1.97 | 2.18 |
| YPAC-02 | HRAS    | 2.03 | 2.27 |
| YPAC-02 | IDH1    | 2.45 | 2.7  |
| YPAC-02 | IDH2    | 2.32 | 1.81 |
| YPAC-02 | IGF1R   | 2.32 | 1.81 |
| YPAC-02 | ITK     | 2.04 | 2.11 |
| YPAC-02 | JAK1    | 2.04 | 2.24 |
| YPAC-02 | JAK2    | 1.65 | 0.96 |
| YPAC-02 | JAK3    | 1.59 | 1.15 |
| YPAC-02 | KDR     | 2.12 | 1.65 |
| YPAC-02 | KIT     | 2.12 | 1.65 |
| YPAC-02 | KRAS    | 3.89 | 3.96 |
| YPAC-02 | MDM2    | 1.97 | 2.18 |
| YPAC-02 | MET     | 2.44 | 2.59 |
| YPAC-02 | MLH1    | 1.96 | 1.66 |
| YPAC-02 | MPL     | 2.04 | 2.24 |
| YPAC-02 | MTOR    | 2.04 | 2.24 |
| YPAC-02 | NF1     | 2    | 1.64 |
| YPAC-02 | NOTCH1  | 1.82 | 1.82 |
| YPAC-02 | NPM1    | 2.04 | 2.11 |
| YPAC-02 | NRAS    | 2.04 | 2.24 |
| YPAC-02 | NTRK1   | 2.21 | 2.32 |
| YPAC-02 | PDGFRA  | 2.12 | 1.65 |
| YPAC-02 | PDGFRB  | 2.04 | 2.11 |
| YPAC-02 | PIK3CA  | 2.1  | 2.79 |
| YPAC-02 | PIK3R1  | 2.04 | 2.11 |
| YPAC-02 | PTCH1   | 1.82 | 1.82 |
| YPAC-02 | PTCH2   | 2.04 | 2.24 |
| YPAC-02 | PTEN    | 2.19 | 2.62 |
| YPAC-02 | RB1     | 2.01 | 1.49 |
| YPAC-02 | RET     | 2.19 | 2.62 |
| YPAC-02 | ROS1    | 1.69 | 1.16 |
| YPAC-02 | SMAD4   | 1.73 | 1.72 |
| YPAC-02 | SMARCB1 | 2.07 | 2.29 |
| YPAC-02 | SMO     | 2.44 | 2.59 |
| YPAC-02 | SRC     | 2.13 | 2.16 |
| YPAC-02 | STK11   | 1.59 | 1.15 |
| YPAC-02 | SYK     | 1.82 | 1.82 |
| YPAC-02 | TERT    | 2.09 | 2.11 |
| YPAC-02 | TMPRSS2 | 2.01 | 2.06 |
| YPAC-02 | TOP1    | 2.13 | 2.16 |
| YPAC-02 | TP53    | 1.79 | 1.64 |
| YPAC-02 | VHL     | 1.96 | 1.66 |

|         |        |      |      |
|---------|--------|------|------|
| YPAC-05 | ABL1   | 2.02 | 3.11 |
| YPAC-05 | AKT1   | 1.97 | 2.35 |
| YPAC-05 | AKT2   | 2.06 | 2.41 |
| YPAC-05 | AKT3   | 1.92 | 2.17 |
| YPAC-05 | ALK    | 2.27 | 2.4  |
| YPAC-05 | APC    | 2.23 | 2.44 |
| YPAC-05 | ARID1A | 1.86 | 1.58 |
| YPAC-05 | ARID1B | 2.2  | 2.85 |
| YPAC-05 | ARID2  | 1.94 | 1.48 |
| YPAC-05 | ATM    | 1.71 | 0.92 |
| YPAC-05 | ATRX   | 1.28 | 1.5  |
| YPAC-05 | AURKA  | 2.02 | 2.05 |
| YPAC-05 | AURKB  | 1.91 | 2.41 |
| YPAC-05 | BCL2   | 1.83 | 1.65 |
| YPAC-05 | BRAF   | 2.04 | 1.86 |
| YPAC-05 | BRCA1  | 2.03 | 2.14 |
| YPAC-05 | BRCA2  | 2.16 | 2.11 |
| YPAC-05 | CDH1   | 1.83 | 2.11 |
| YPAC-05 | CDK4   | 1.94 | 1.48 |
| YPAC-05 | CDK6   | 2.04 | 1.86 |
| YPAC-05 | CDKN2A | 2.32 | 0.01 |
| YPAC-05 | CSF1R  | 2.23 | 2.44 |
| YPAC-05 | CTNNB1 | 1.92 | 2.16 |
| YPAC-05 | DDR2   | 1.92 | 2.17 |
| YPAC-05 | EGFR   | 2.23 | 2.05 |
| YPAC-05 | EPHB4  | 2.04 | 1.86 |
| YPAC-05 | ERBB2  | 2.03 | 2.14 |
| YPAC-05 | ERBB3  | 1.94 | 1.48 |
| YPAC-05 | ERBB4  | 2.17 | 1.44 |
| YPAC-05 | EWSR1  | 1.84 | 2.12 |
| YPAC-05 | EZH2   | 2.04 | 1.86 |
| YPAC-05 | FBXW7  | 1.92 | 1.51 |
| YPAC-05 | FGFR1  | 1.78 | 2.23 |
| YPAC-05 | FGFR2  | 2.35 | 2.33 |
| YPAC-05 | FGFR3  | 2.34 | 3.08 |
| YPAC-05 | FLT3   | 2.16 | 2.11 |
| YPAC-05 | GNA11  | 1.92 | 1.35 |
| YPAC-05 | GNAQ   | 2.02 | 3.11 |
| YPAC-05 | GNAS   | 2.02 | 2.05 |
| YPAC-05 | HNF1A  | 1.94 | 1.48 |
| YPAC-05 | HRAS   | 2.12 | 2.11 |
| YPAC-05 | IDH1   | 2.17 | 1.44 |
| YPAC-05 | IDH2   | 2.16 | 2.26 |

|         |         |      |      |
|---------|---------|------|------|
| YPAC-05 | IGF1R   | 2.16 | 2.26 |
| YPAC-05 | ITK     | 2.23 | 2.44 |
| YPAC-05 | JAK1    | 1.86 | 1.51 |
| YPAC-05 | JAK2    | 2.32 | 3.42 |
| YPAC-05 | JAK3    | 1.92 | 1.35 |
| YPAC-05 | KDR     | 1.92 | 1.51 |
| YPAC-05 | KIT     | 1.92 | 1.51 |
| YPAC-05 | KRAS    | 8.06 | 6.25 |
| YPAC-05 | MDM2    | 1.94 | 1.48 |
| YPAC-05 | MET     | 2.04 | 1.86 |
| YPAC-05 | MLH1    | 1.92 | 2.16 |
| YPAC-05 | MPL     | 1.86 | 3.17 |
| YPAC-05 | MTOR    | 1.86 | 1.58 |
| YPAC-05 | NF1     | 2.03 | 2.14 |
| YPAC-05 | NOTCH1  | 2.02 | 3.11 |
| YPAC-05 | NPM1    | 2.23 | 2.44 |
| YPAC-05 | NRAS    | 1.86 | 1.51 |
| YPAC-05 | NTRK1   | 1.92 | 2.17 |
| YPAC-05 | PDGFRA  | 1.92 | 1.51 |
| YPAC-05 | PDGFRB  | 2.23 | 2.44 |
| YPAC-05 | PIK3CA  | 2.1  | 2.81 |
| YPAC-05 | PIK3R1  | 2.23 | 2.44 |
| YPAC-05 | PTCH1   | 2.02 | 3.11 |
| YPAC-05 | PTCH2   | 1.86 | 3.17 |
| YPAC-05 | PTEN    | 2.35 | 2.33 |
| YPAC-05 | RB1     | 2.16 | 2.11 |
| YPAC-05 | RET     | 2.35 | 2.33 |
| YPAC-05 | ROS1    | 2.2  | 2.85 |
| YPAC-05 | SMAD4   | 1.83 | 1.65 |
| YPAC-05 | SMARCB1 | 2.05 | 1.91 |
| YPAC-05 | SMO     | 2.04 | 1.86 |
| YPAC-05 | SRC     | 2.02 | 2.05 |
| YPAC-05 | STK11   | 1.92 | 1.35 |
| YPAC-05 | SYK     | 2.02 | 3.11 |
| YPAC-05 | TMPRSS2 | 1.96 | 2.46 |
| YPAC-05 | TOP1    | 2.02 | 2.05 |
| YPAC-05 | TP53    | 1.91 | 2.41 |
| YPAC-05 | VHL     | 1.92 | 2.16 |
| YPAC-06 | ABL1    | 1.96 | 1.44 |
| YPAC-06 | AKT1    | 2.1  | 2.16 |
| YPAC-06 | AKT2    | 2.02 | 3.45 |
| YPAC-06 | AKT3    | 2.29 | 3.36 |
| YPAC-06 | ALK     | 2.4  | 2.93 |



|         |        |      |      |
|---------|--------|------|------|
| YPAC-06 | APC    | 1.9  | 2.01 |
| YPAC-06 | ARID1A | 1.88 | 2.1  |
| YPAC-06 | ARID1B | 2.2  | 2.79 |
| YPAC-06 | ARID2  | 1.82 | 2.07 |
| YPAC-06 | ATM    | 2.12 | 2.24 |
| YPAC-06 | ATRX   | 2.19 | 1.73 |
| YPAC-06 | AURKA  | 1.97 | 2.06 |
| YPAC-06 | AURKB  | 1.9  | 1.47 |
| YPAC-06 | BCL2   | 1.96 | 0.81 |
| YPAC-06 | BRAF   | 2.03 | 1.55 |
| YPAC-06 | BRCA1  | 2.14 | 2.73 |
| YPAC-06 | BRCA2  | 2.42 | 2.28 |
| YPAC-06 | CDH1   | 1.99 | 2.59 |
| YPAC-06 | CDK4   | 1.82 | 2.07 |
| YPAC-06 | CDK6   | 2.03 | 1.55 |
| YPAC-06 | CDKN2A | 1.95 | 0.06 |
| YPAC-06 | CSF1R  | 1.9  | 2.01 |
| YPAC-06 | CTNNB1 | 1.88 | 1.5  |
| YPAC-06 | DDR2   | 2.29 | 3.36 |
| YPAC-06 | EGFR   | 2.35 | 2.94 |
| YPAC-06 | EPHB4  | 2.03 | 1.55 |
| YPAC-06 | ERBB2  | 2.14 | 2.73 |
| YPAC-06 | ERBB3  | 1.82 | 2.07 |
| YPAC-06 | ERBB4  | 2.37 | 2.92 |
| YPAC-06 | EWSR1  | 1.95 | 2.04 |
| YPAC-06 | EZH2   | 2.03 | 1.55 |
| YPAC-06 | FBXW7  | 2.15 | 2.13 |
| YPAC-06 | FGFR1  | 2.21 | 2.64 |
| YPAC-06 | FGFR2  | 2.13 | 2.07 |
| YPAC-06 | FGFR3  | 2.01 | 2.09 |
| YPAC-06 | FLT3   | 2.42 | 2.28 |
| YPAC-06 | GNA11  | 1.68 | 1.42 |
| YPAC-06 | GNAQ   | 1.96 | 1.44 |
| YPAC-06 | GNAS   | 1.97 | 2.06 |
| YPAC-06 | HNF1A  | 1.82 | 2.07 |
| YPAC-06 | HRAS   | 2    | 2.13 |
| YPAC-06 | IDH1   | 2.37 | 2.92 |
| YPAC-06 | IDH2   | 2.15 | 2.19 |
| YPAC-06 | IGF1R  | 2.15 | 2.19 |
| YPAC-06 | ITK    | 1.9  | 2.01 |
| YPAC-06 | JAK1   | 1.88 | 2.1  |
| YPAC-06 | JAK2   | 1.95 | 1.37 |
| YPAC-06 | JAK3   | 1.68 | 1.42 |

|         |         |      |      |
|---------|---------|------|------|
| YPAC-06 | KDR     | 2.01 | 2.09 |
| YPAC-06 | KIT     | 2.01 | 2.09 |
| YPAC-06 | KRAS    | 2.11 | 3.37 |
| YPAC-06 | MDM2    | 1.82 | 2.07 |
| YPAC-06 | MET     | 2.03 | 1.55 |
| YPAC-06 | MLH1    | 1.88 | 1.5  |
| YPAC-06 | MPL     | 1.88 | 2.1  |
| YPAC-06 | MTOR    | 1.88 | 2.1  |
| YPAC-06 | NF1     | 2.14 | 2.73 |
| YPAC-06 | NOTCH1  | 1.96 | 1.44 |
| YPAC-06 | NPM1    | 1.9  | 2.01 |
| YPAC-06 | NRAS    | 1.88 | 2.1  |
| YPAC-06 | NTRK1   | 2.29 | 3.36 |
| YPAC-06 | PDGFRA  | 2.01 | 2.09 |
| YPAC-06 | PDGFRB  | 1.9  | 2.01 |
| YPAC-06 | PIK3CA  | 2.2  | 2.24 |
| YPAC-06 | PIK3R1  | 1.9  | 2.01 |
| YPAC-06 | PTCH1   | 1.96 | 1.44 |
| YPAC-06 | PTCH2   | 1.88 | 2.1  |
| YPAC-06 | PTEN    | 2.13 | 2.07 |
| YPAC-06 | RB1     | 2.42 | 2.28 |
| YPAC-06 | RET     | 2.13 | 2.07 |
| YPAC-06 | ROS1    | 2.2  | 2.79 |
| YPAC-06 | SMAD4   | 1.96 | 0.81 |
| YPAC-06 | SMARCB1 | 2.34 | 2.17 |
| YPAC-06 | SMO     | 2.03 | 1.55 |
| YPAC-06 | SRC     | 1.97 | 2.06 |
| YPAC-06 | STK11   | 1.68 | 1.42 |
| YPAC-06 | SYK     | 1.96 | 1.44 |
| YPAC-06 | TMPRSS2 | 1.89 | 1.82 |
| YPAC-06 | TOP1    | 1.97 | 2.06 |
| YPAC-06 | TP53    | 1.9  | 1.47 |
| YPAC-06 | VHL     | 1.88 | 1.5  |
| YPAC-10 | ABL1    | 2.14 | 2.19 |
| YPAC-10 | AKT1    | 1.9  | 1.22 |
| YPAC-10 | AKT2    | 1.78 | 1.97 |
| YPAC-10 | AKT3    | 2.15 | 2.22 |
| YPAC-10 | ALK     | 2.28 | 2.3  |
| YPAC-10 | APC     | 2.06 | 2.16 |
| YPAC-10 | ARID1A  | 2.01 | 2.1  |
| YPAC-10 | ARID1B  | 2.19 | 2.17 |
| YPAC-10 | ARID2   | 2.06 | 2.14 |
| YPAC-10 | ATM     | 2.21 | 2.29 |

|         |        |      |      |
|---------|--------|------|------|
| YPAC-10 | ATRX   | 1.71 | 1.09 |
| YPAC-10 | AURKA  | 1.99 | 2.1  |
| YPAC-10 | AURKB  | 1.9  | 1.18 |
| YPAC-10 | BCL2   | 1.99 | 1.24 |
| YPAC-10 | BRAF   | 2.07 | 2.12 |
| YPAC-10 | BRCA1  | 1.78 | 1.14 |
| YPAC-10 | BRCA2  | 2.2  | 2.07 |
| YPAC-10 | CDH1   | 2.03 | 2.04 |
| YPAC-10 | CDK4   | 2.06 | 2.14 |
| YPAC-10 | CDK6   | 2.07 | 2.12 |
| YPAC-10 | CDKN2A | 2.07 | 0.15 |
| YPAC-10 | CSF1R  | 2.06 | 2.16 |
| YPAC-10 | CTNNB1 | 2    | 2.17 |
| YPAC-10 | DDR2   | 2.15 | 2.22 |
| YPAC-10 | EGFR   | 2.45 | 2.58 |
| YPAC-10 | EPHB4  | 2.07 | 2.12 |
| YPAC-10 | ERBB2  | 1.78 | 1.14 |
| YPAC-10 | ERBB3  | 2.06 | 2.14 |
| YPAC-10 | ERBB4  | 2.23 | 2.24 |
| YPAC-10 | EWSR1  | 1.82 | 1.11 |
| YPAC-10 | EZH2   | 2.07 | 2.12 |
| YPAC-10 | FBXW7  | 2.15 | 2.13 |
| YPAC-10 | FGFR1  | 1.86 | 1.14 |
| YPAC-10 | FGFR2  | 2.1  | 2.1  |
| YPAC-10 | FGFR3  | 2.01 | 2.1  |
| YPAC-10 | FLT3   | 2.2  | 2.07 |
| YPAC-10 | GNA11  | 1.84 | 1.94 |
| YPAC-10 | GNAQ   | 2.14 | 2.19 |
| YPAC-10 | GNAS   | 1.99 | 2.1  |
| YPAC-10 | HNF1A  | 2.06 | 2.14 |
| YPAC-10 | HRAS   | 2.05 | 2.18 |
| YPAC-10 | IDH1   | 2.23 | 2.24 |
| YPAC-10 | IDH2   | 2.13 | 2.1  |
| YPAC-10 | IGF1R  | 2.13 | 2.1  |
| YPAC-10 | ITK    | 2.06 | 2.16 |
| YPAC-10 | JAK1   | 2.01 | 2.1  |
| YPAC-10 | JAK2   | 2.07 | 2.09 |
| YPAC-10 | JAK3   | 1.84 | 1.94 |
| YPAC-10 | KDR    | 2.01 | 2.1  |
| YPAC-10 | KIT    | 2.01 | 2.1  |
| YPAC-10 | KRAS   | 2.12 | 2.19 |
| YPAC-10 | MDM2   | 2.06 | 2.14 |
| YPAC-10 | MET    | 2.07 | 2.12 |

|         |         |      |      |
|---------|---------|------|------|
| YPAC-10 | MLH1    | 2    | 2.17 |
| YPAC-10 | MPL     | 2.01 | 2.1  |
| YPAC-10 | MTOR    | 2.01 | 2.1  |
| YPAC-10 | NF1     | 1.78 | 1.14 |
| YPAC-10 | NOTCH1  | 2.14 | 2.19 |
| YPAC-10 | NPM1    | 2.06 | 2.16 |
| YPAC-10 | NRAS    | 2.01 | 2.1  |
| YPAC-10 | NTRK1   | 2.15 | 2.22 |
| YPAC-10 | PDGFRA  | 2.01 | 2.1  |
| YPAC-10 | PDGFRB  | 2.06 | 2.16 |
| YPAC-10 | PIK3CA  | 2.15 | 2.22 |
| YPAC-10 | PIK3R1  | 2.06 | 2.16 |
| YPAC-10 | PTCH1   | 2.14 | 2.19 |
| YPAC-10 | PTCH2   | 2.01 | 2.1  |
| YPAC-10 | PTEN    | 2.1  | 2.1  |
| YPAC-10 | RB1     | 2.2  | 2.19 |
| YPAC-10 | RET     | 2.1  | 1.96 |
| YPAC-10 | ROS1    | 2.19 | 2.17 |
| YPAC-10 | SMAD4   | 1.99 | 1.24 |
| YPAC-10 | SMARCB1 | 2.06 | 1.63 |
| YPAC-10 | SMO     | 2.07 | 2.12 |
| YPAC-10 | SRC     | 1.99 | 2.1  |
| YPAC-10 | STK11   | 1.84 | 1.94 |
| YPAC-10 | SYK     | 2.14 | 2.19 |
| YPAC-10 | TMPRSS2 | 1.96 | 1.33 |
| YPAC-10 | TOP1    | 1.99 | 2.1  |
| YPAC-10 | TP53    | 1.9  | 1.18 |
| YPAC-10 | VHL     | 2    | 2.17 |
| YPAC-13 | ABL1    | 2.1  | 2.08 |
| YPAC-13 | AKT1    | 2.34 | 2.96 |
| YPAC-13 | AKT2    | 1.71 | 1.83 |
| YPAC-13 | AKT3    | 2.19 | 2.17 |
| YPAC-13 | ALK     | 2.21 | 2.26 |
| YPAC-13 | APC     | 2.15 | 2.15 |
| YPAC-13 | ARID1A  | 2.07 | 2.08 |
| YPAC-13 | ARID1B  | 1.82 | 1.48 |
| YPAC-13 | ARID2   | 2.09 | 2.11 |
| YPAC-13 | ATM     | 2.23 | 2.26 |
| YPAC-13 | ATRX    | 1.21 | 1.25 |
| YPAC-13 | AURKA   | 1.98 | 2.01 |
| YPAC-13 | AURKB   | 1.68 | 1.37 |
| YPAC-13 | BCL2    | 1.87 | 1.51 |
| YPAC-13 | BRAF    | 2.09 | 2.27 |

|         |        |      |      |
|---------|--------|------|------|
| YPAC-13 | BRCA1  | 1.65 | 1.36 |
| YPAC-13 | BRCA2  | 2.03 | 2.1  |
| YPAC-13 | CDH1   | 1.93 | 2.04 |
| YPAC-13 | CDK4   | 2.09 | 2.11 |
| YPAC-13 | CDK6   | 2.09 | 2.27 |
| YPAC-13 | CDKN2A | 1.8  | 1.5  |
| YPAC-13 | CSF1R  | 2.15 | 2.15 |
| YPAC-13 | CTNNB1 | 2.12 | 2.11 |
| YPAC-13 | DDR2   | 2.19 | 2.17 |
| YPAC-13 | EGFR   | 2.22 | 2.46 |
| YPAC-13 | EPHB4  | 2.09 | 2.27 |
| YPAC-13 | ERBB2  | 1.65 | 1.36 |
| YPAC-13 | ERBB3  | 2.09 | 2.11 |
| YPAC-13 | ERBB4  | 2.25 | 2.26 |
| YPAC-13 | EWSR1  | 2.03 | 2.12 |
| YPAC-13 | EZH2   | 2.09 | 2.27 |
| YPAC-13 | FBXW7  | 2.22 | 2.16 |
| YPAC-13 | FGFR1  | 1.69 | 1.42 |
| YPAC-13 | FGFR2  | 2.08 | 2.08 |
| YPAC-13 | FGFR3  | 2.01 | 2.12 |
| YPAC-13 | FLT3   | 2.03 | 2.1  |
| YPAC-13 | GNA11  | 1.76 | 1.85 |
| YPAC-13 | GNAQ   | 2.1  | 2.08 |
| YPAC-13 | GNAS   | 1.98 | 2.01 |
| YPAC-13 | HNF1A  | 2.09 | 2.11 |
| YPAC-13 | HRAS   | 2.07 | 2.2  |
| YPAC-13 | IDH1   | 2.25 | 2.26 |
| YPAC-13 | IDH2   | 2.21 | 2.16 |
| YPAC-13 | IGF1R  | 2.21 | 2.16 |
| YPAC-13 | ITK    | 2.15 | 2.15 |
| YPAC-13 | JAK1   | 2.07 | 2.08 |
| YPAC-13 | JAK2   | 1.8  | 1.5  |
| YPAC-13 | JAK3   | 1.76 | 1.85 |
| YPAC-13 | KDR    | 2.01 | 2.12 |
| YPAC-13 | KIT    | 2.01 | 2.12 |
| YPAC-13 | KRAS   | 1.87 | 2.67 |
| YPAC-13 | MDM2   | 2.09 | 2.11 |
| YPAC-13 | MET    | 2.09 | 2.27 |
| YPAC-13 | MLH1   | 2.12 | 2.11 |
| YPAC-13 | MPL    | 2.07 | 2.08 |
| YPAC-13 | MTOR   | 2.07 | 2.08 |
| YPAC-13 | NF1    | 1.65 | 1.36 |
| YPAC-13 | NOTCH1 | 2.1  | 2.08 |

|         |         |      |      |
|---------|---------|------|------|
| YPAC-13 | NPM1    | 2.15 | 2.15 |
| YPAC-13 | NRAS    | 2.07 | 2.08 |
| YPAC-13 | NTRK1   | 2.19 | 2.17 |
| YPAC-13 | PDGFRA  | 2.01 | 2.12 |
| YPAC-13 | PDGFRB  | 2.15 | 2.15 |
| YPAC-13 | PIK3CA  | 2.22 | 2.23 |
| YPAC-13 | PIK3R1  | 2.15 | 2.15 |
| YPAC-13 | PTCH1   | 2.1  | 2.08 |
| YPAC-13 | PTCH2   | 2.07 | 2.08 |
| YPAC-13 | PTEN    | 2.08 | 2.08 |
| YPAC-13 | RB1     | 2.15 | 2.18 |
| YPAC-13 | RET     | 2.08 | 2.08 |
| YPAC-13 | ROS1    | 1.82 | 1.48 |
| YPAC-13 | SMAD4   | 1.87 | 1.51 |
| YPAC-13 | SMARCB1 | 2.03 | 2.12 |
| YPAC-13 | SMO     | 2.09 | 2.27 |
| YPAC-13 | SRC     | 1.98 | 2.01 |
| YPAC-13 | STK11   | 1.76 | 1.85 |
| YPAC-13 | SYK     | 2.1  | 2.08 |
| YPAC-13 | TMPRSS2 | 1.83 | 1.87 |
| YPAC-13 | TOP1    | 1.98 | 2.01 |
| YPAC-13 | TP53    | 1.68 | 1.37 |
| YPAC-13 | VHL     | 2.12 | 2.11 |
| YPAC-15 | ABL1    | 1.36 | 1.44 |
| YPAC-15 | AKT1    | 2.26 | 2.69 |
| YPAC-15 | AKT2    | 1.63 | 1.77 |
| YPAC-15 | AKT3    | 2.49 | 2.8  |
| YPAC-15 | ALK     | 2.01 | 2.03 |
| YPAC-15 | APC     | 2.16 | 2.53 |
| YPAC-15 | ARID1A  | 1.63 | 1.55 |
| YPAC-15 | ARID1B  | 2.72 | 2.81 |
| YPAC-15 | ARID2   | 0.71 | 0.65 |
| YPAC-15 | ATM     | 1.74 | 1.44 |
| YPAC-15 | ATRX    | 1.55 | 1.41 |
| YPAC-15 | AURKA   | 2.74 | 3.9  |
| YPAC-15 | AURKB   | 1.77 | 1.56 |
| YPAC-15 | BCL2    | 1.65 | 1.23 |
| YPAC-15 | BRAF    | 1.92 | 2.34 |
| YPAC-15 | BRCA1   | 1.89 | 2    |
| YPAC-15 | BRCA2   | 2.11 | 2.43 |
| YPAC-15 | CDH1    | 2.08 | 2.16 |
| YPAC-15 | CDK4    | 0.71 | 0.65 |
| YPAC-15 | CDK6    | 2.21 | 2.23 |

|         |        |      |       |
|---------|--------|------|-------|
| YPAC-15 | CDKN2A | 2.21 | 0.03  |
| YPAC-15 | CSF1R  | 2.16 | 2.53  |
| YPAC-15 | CTNNB1 | 1.68 | 1.42  |
| YPAC-15 | DDR2   | 2.49 | 2.8   |
| YPAC-15 | EGFR   | 2.23 | 2.3   |
| YPAC-15 | EPHB4  | 0    | 0     |
| YPAC-15 | ERBB2  | 1.89 | 2     |
| YPAC-15 | ERBB3  | 0.71 | 0.65  |
| YPAC-15 | ERBB4  | 2.02 | 2.05  |
| YPAC-15 | EWSR1  | 0.44 | 0.32  |
| YPAC-15 | EZH2   | 1.92 | 2.34  |
| YPAC-15 | FBXW7  | 1.7  | 1.39  |
| YPAC-15 | FGFR1  | 1.61 | 1.45  |
| YPAC-15 | FGFR2  | 2.03 | 2.28  |
| YPAC-15 | FGFR3  | 1.87 | 1.95  |
| YPAC-15 | FLT3   | 2.11 | 2.43  |
| YPAC-15 | GNA11  | 1.61 | 1.79  |
| YPAC-15 | GNAQ   | 2.54 | 2.22  |
| YPAC-15 | GNAS   | 2.74 | 3.9   |
| YPAC-15 | HNF1A  | 0.71 | 0.65  |
| YPAC-15 | HRAS   | 1.88 | 2.01  |
| YPAC-15 | IDH1   | 2.02 | 2.05  |
| YPAC-15 | IDH2   | 2.32 | 2.53  |
| YPAC-15 | IGF1R  | 2.32 | 2.53  |
| YPAC-15 | ITK    | 0    | 2.53  |
| YPAC-15 | JAK1   | 1.94 | 1.99  |
| YPAC-15 | JAK2   | 2.21 | 2.47  |
| YPAC-15 | JAK3   | 1.61 | 1.79  |
| YPAC-15 | KDR    | 1.87 | 1.95  |
| YPAC-15 | KIT    | 1.87 | 1.95  |
| YPAC-15 | KRAS   | 8.31 | 18.69 |
| YPAC-15 | MDM2   | 0.71 | 0.65  |
| YPAC-15 | MET    | 1.92 | 2.34  |
| YPAC-15 | MLH1   | 1.65 | 0     |
| YPAC-15 | MPL    | 1.63 | 1.55  |
| YPAC-15 | MTOR   | 1.63 | 1.55  |
| YPAC-15 | NF1    | 1.89 | 2     |
| YPAC-15 | NOTCH1 | 1.36 | 1.44  |
| YPAC-15 | NPM1   | 2.16 | 2.54  |
| YPAC-15 | NRAS   | 1.94 | 1.99  |
| YPAC-15 | NTRK1  | 2.49 | 2.8   |
| YPAC-15 | PDGFRA | 1.87 | 1.95  |
| YPAC-15 | PDGFRB | 2.16 | 2.53  |

|         |         |      |      |
|---------|---------|------|------|
| YPAC-15 | PIK3CA  | 2.53 | 3.79 |
| YPAC-15 | PIK3R1  | 2.16 | 2.53 |
| YPAC-15 | PTCH1   | 0    | 2.22 |
| YPAC-15 | PTCH2   | 0    | 0    |
| YPAC-15 | PTEN    | 2.03 | 2.28 |
| YPAC-15 | RB1     | 2.11 | 2.43 |
| YPAC-15 | RET     | 2.03 | 2.28 |
| YPAC-15 | ROS1    | 2.72 | 2.81 |
| YPAC-15 | SMAD4   | 1.65 | 1.23 |
| YPAC-15 | SMARCB1 | 0.44 | 0.32 |
| YPAC-15 | SMO     | 1.92 | 2.34 |
| YPAC-15 | SRC     | 2.74 | 3.9  |
| YPAC-15 | STK11   | 1.61 | 1.79 |
| YPAC-15 | SYK     | 2.54 | 2.22 |
| YPAC-15 | TMPRSS2 | 1.41 | 1.19 |
| YPAC-15 | TOP1    | 2.74 | 3.9  |
| YPAC-15 | TP53    | 1.77 | 1.56 |
| YPAC-15 | VHL     | 1.65 | 1.52 |
| YPAC-17 | ABL1    | 2.18 | 2.31 |
| YPAC-17 | AKT1    | 2.54 | 2.99 |
| YPAC-17 | AKT2    | 1.72 | 1.83 |
| YPAC-17 | AKT3    | 2.05 | 1.32 |
| YPAC-17 | ALK     | 2.31 | 2.45 |
| YPAC-17 | APC     | 2.13 | 2.23 |
| YPAC-17 | ARID1A  | 2.08 | 2.19 |
| YPAC-17 | ARID1B  | 2.17 | 2.09 |
| YPAC-17 | ARID2   | 2.09 | 2.2  |
| YPAC-17 | ATM     | 2.29 | 2.42 |
| YPAC-17 | ATRX    | 1.09 | 0.46 |
| YPAC-17 | AURKA   | 1.97 | 2    |
| YPAC-17 | AURKB   | 1.66 | 1.19 |
| YPAC-17 | BCL2    | 1.93 | 1.33 |
| YPAC-17 | BRAF    | 2.06 | 2.09 |
| YPAC-17 | BRCA1   | 2.01 | 2.15 |
| YPAC-17 | BRCA2   | 2    | 2.12 |
| YPAC-17 | CDH1    | 1.95 | 2.05 |
| YPAC-17 | CDK4    | 2.09 | 2.2  |
| YPAC-17 | CDK6    | 2.06 | 2.09 |
| YPAC-17 | CDKN2A  | 1.8  | 0.03 |
| YPAC-17 | CSF1R   | 2.13 | 2.23 |
| YPAC-17 | CTNNB1  | 2.2  | 2.3  |
| YPAC-17 | DDR2    | 2.05 | 2.36 |
| YPAC-17 | EGFR    | 2.78 | 4.55 |



|         |        |      |      |
|---------|--------|------|------|
| YPAC-17 | EPHB4  | 2.06 | 2.09 |
| YPAC-17 | ERBB2  | 2.01 | 2.15 |
| YPAC-17 | ERBB3  | 2.09 | 2.2  |
| YPAC-17 | ERBB4  | 2.27 | 2.39 |
| YPAC-17 | EWSR1  | 1.99 | 2.18 |
| YPAC-17 | EZH2   | 2.06 | 2.09 |
| YPAC-17 | FBXW7  | 2.15 | 2.29 |
| YPAC-17 | FGFR1  | 1.73 | 1.24 |
| YPAC-17 | FGFR2  | 2.17 | 1.85 |
| YPAC-17 | FGFR3  | 1.24 | 1.1  |
| YPAC-17 | FLT3   | 2    | 2.12 |
| YPAC-17 | GNA11  | 1.77 | 1.95 |
| YPAC-17 | GNAQ   | 2.18 | 2.31 |
| YPAC-17 | GNAS   | 1.97 | 2    |
| YPAC-17 | GNF1A  | 2.09 | 2.2  |
| YPAC-17 | HRAS   | 2.16 | 2.22 |
| YPAC-17 | IDH1   | 2.27 | 2.39 |
| YPAC-17 | IDH2   | 1.82 | 1.33 |
| YPAC-17 | IGF1R  | 1.82 | 1.33 |
| YPAC-17 | ITK    | 2.13 | 2.23 |
| YPAC-17 | JAK1   | 2.08 | 2.19 |
| YPAC-17 | JAK2   | 1.8  | 1.07 |
| YPAC-17 | JAK3   | 1.77 | 1.95 |
| YPAC-17 | KDR    | 2.04 | 2.14 |
| YPAC-17 | KIT    | 2.04 | 2.14 |
| YPAC-17 | KRAS   | 2.17 | 2.24 |
| YPAC-17 | MDM2   | 2.09 | 2.2  |
| YPAC-17 | MET    | 2.06 | 2.09 |
| YPAC-17 | MLH1   | 2.2  | 2.3  |
| YPAC-17 | MPL    | 2.08 | 2.19 |
| YPAC-17 | MTOR   | 2.08 | 2.19 |
| YPAC-17 | NF1    | 2.01 | 2.15 |
| YPAC-17 | NOTCH1 | 2.18 | 2.31 |
| YPAC-17 | NPM1   | 2.13 | 2.23 |
| YPAC-17 | NRAS   | 2.08 | 2.19 |
| YPAC-17 | NTRK1  | 2.05 | 2.36 |
| YPAC-17 | PDGFRA | 2.04 | 2.14 |
| YPAC-17 | PDGFRB | 2.13 | 2.23 |
| YPAC-17 | PIK3CA | 2.23 | 2.36 |
| YPAC-17 | PIK3R1 | 2.13 | 2.23 |
| YPAC-17 | PTCH1  | 2.18 | 2.31 |
| YPAC-17 | PTCH2  | 2.08 | 2.19 |
| YPAC-17 | PTEN   | 2.17 | 1.85 |

|         |         |      |      |
|---------|---------|------|------|
| YPAC-17 | RB1     | 2    | 2.12 |
| YPAC-17 | RET     | 2.17 | 1.85 |
| YPAC-17 | ROS1    | 2.17 | 2.09 |
| YPAC-17 | SMAD4   | 1.93 | 1.33 |
| YPAC-17 | SMARCB1 | 1.99 | 2.18 |
| YPAC-17 | SMO     | 2.06 | 2.09 |
| YPAC-17 | SRC     | 1.97 | 2    |
| YPAC-17 | STK11   | 1.77 | 1.95 |
| YPAC-17 | SYK     | 2.18 | 2.31 |
| YPAC-17 | TMPRSS2 | 1.81 | 1.89 |
| YPAC-17 | TOP1    | 1.97 | 2    |
| YPAC-17 | TP53    | 1.66 | 1.19 |
| YPAC-17 | VHL     | 2.2  | 2.3  |
| YPAC-23 | ABL1    | 2.21 | 1.89 |
| YPAC-23 | AKT1    | 2.22 | 2.29 |
| YPAC-23 | AKT2    | 1.84 | 1.48 |
| YPAC-23 | AKT3    | 2.13 | 2    |
| YPAC-23 | ALK     | 2.23 | 2.34 |
| YPAC-23 | APC     | 2.08 | 1.65 |
| YPAC-23 | ARID1A  | 1.92 | 1.11 |
| YPAC-23 | ARID1B  | 1.92 | 2.06 |
| YPAC-23 | ARID2   | 2    | 2.16 |
| YPAC-23 | ATM     | 2.19 | 2.37 |
| YPAC-23 | ATRX    | 1.87 | 1.07 |
| YPAC-23 | AURKA   | 1.98 | 2.04 |
| YPAC-23 | AURKB   | 2.01 | 1.16 |
| YPAC-23 | BCL2    | 1.75 | 1.22 |
| YPAC-23 | BRAF    | 2.01 | 1.09 |
| YPAC-23 | BRCA1   | 1.99 | 3.1  |
| YPAC-23 | BRCA2   | 2    | 1.64 |
| YPAC-23 | CDH1    | 1.94 | 2.02 |
| YPAC-23 | CDK4    | 2    | 2.16 |
| YPAC-23 | CDK6    | 2.01 | 1.09 |
| YPAC-23 | CDKN2A  | 2.08 | 1.8  |
| YPAC-23 | CSF1R   | 2.08 | 1.65 |
| YPAC-23 | CTNNB1  | 2.17 | 2.21 |
| YPAC-23 | DDR2    | 2.13 | 2    |
| YPAC-23 | EGFR    | 2.2  | 1.21 |
| YPAC-23 | EPHB4   | 2.01 | 1.09 |
| YPAC-23 | ERBB2   | 1.99 | 3.1  |
| YPAC-23 | ERBB3   | 2    | 2.16 |
| YPAC-23 | ERBB4   | 2.42 | 2.17 |
| YPAC-23 | EWSR1   | 2.03 | 2.22 |

|         |         |      |      |
|---------|---------|------|------|
| YPAC-23 | EZH2    | 2.01 | 1.09 |
| YPAC-23 | FBXW7   | 2.1  | 2.15 |
| YPAC-23 | FGFR1   | 2.05 | 2.15 |
| YPAC-23 | FGFR2   | 2.07 | 2.46 |
| YPAC-23 | FGFR3   | 2.18 | 2.16 |
| YPAC-23 | FLT3    | 2    | 1.64 |
| YPAC-23 | GNA11   | 1.51 | 1.53 |
| YPAC-23 | GNAQ    | 2.21 | 1.89 |
| YPAC-23 | GNAS    | 1.98 | 2.04 |
| YPAC-23 | GNF1A   | 2    | 2.16 |
| YPAC-23 | HRAS    | 2.13 | 2.21 |
| YPAC-23 | IDH1    | 2.42 | 2.17 |
| YPAC-23 | IDH2    | 2.12 | 2.17 |
| YPAC-23 | IGF1R   | 2.12 | 2.17 |
| YPAC-23 | ITK     | 2.08 | 1.65 |
| YPAC-23 | JAK1    | 1.92 | 2.25 |
| YPAC-23 | JAK2    | 2.08 | 1.8  |
| YPAC-23 | JAK3    | 1.51 | 1.53 |
| YPAC-23 | KDR     | 2.18 | 2.16 |
| YPAC-23 | KIT     | 2.18 | 2.16 |
| YPAC-23 | KRAS    | 1.99 | 2.24 |
| YPAC-23 | MDM2    | 2    | 2.16 |
| YPAC-23 | MET     | 2.01 | 1.09 |
| YPAC-23 | MLH1    | 2.17 | 2.21 |
| YPAC-23 | MPL     | 1.92 | 2.25 |
| YPAC-23 | MTOR    | 1.92 | 1.11 |
| YPAC-23 | NF1     | 1.99 | 3.1  |
| YPAC-23 | NOTCH1  | 2.21 | 1.89 |
| YPAC-23 | NPM1    | 2.08 | 1.65 |
| YPAC-23 | NRAS    | 1.92 | 2.25 |
| YPAC-23 | NTRK1   | 2.13 | 2    |
| YPAC-23 | PDGFRA  | 2.18 | 2.16 |
| YPAC-23 | PDGFRB  | 2.08 | 1.65 |
| YPAC-23 | PIK3CA  | 2.15 | 2.28 |
| YPAC-23 | PIK3R1  | 2.08 | 1.65 |
| YPAC-23 | PTCH1   | 2.21 | 1.89 |
| YPAC-23 | PTCH2   | 1.92 | 2.25 |
| YPAC-23 | PTEN    | 2.07 | 2.46 |
| YPAC-23 | RB1     | 2.11 | 1.77 |
| YPAC-23 | RET     | 2.07 | 2.46 |
| YPAC-23 | ROS1    | 1.92 | 2.06 |
| YPAC-23 | SMAD4   | 1.75 | 0    |
| YPAC-23 | SMARCB1 | 2.03 | 2.22 |

|         |         |      |      |
|---------|---------|------|------|
| YPAC-23 | SMO     | 2.01 | 1.09 |
| YPAC-23 | SRC     | 1.98 | 2.04 |
| YPAC-23 | STK11   | 1.51 | 1.53 |
| YPAC-23 | SYK     | 2.21 | 1.89 |
| YPAC-23 | TMPRSS2 | 1.86 | 1.75 |
| YPAC-23 | TOP1    | 1.98 | 2.04 |
| YPAC-23 | TP53    | 2.01 | 1.16 |
| YPAC-23 | VHL     | 2.17 | 2.21 |
| YPAC-26 | ABL1    | 1.31 | 1.06 |
| YPAC-26 | AKT1    | 2.19 | 2.25 |
| YPAC-26 | AKT2    | 1.68 | 1.81 |
| YPAC-26 | AKT3    | 2.18 | 2.21 |
| YPAC-26 | ALK     | 2.2  | 2.35 |
| YPAC-26 | APC     | 1.78 | 2.25 |
| YPAC-26 | ARID1A  | 1.38 | 1.14 |
| YPAC-26 | ARID1B  | 1.76 | 1.37 |
| YPAC-26 | ARID2   | 2    | 0.98 |
| YPAC-26 | ATM     | 2.14 | 2.33 |
| YPAC-26 | ATRX    | 1.19 | 1.32 |
| YPAC-26 | AURKA   | 2.4  | 3.23 |
| YPAC-26 | AURKB   | 1.61 | 1.19 |
| YPAC-26 | BCL2    | 1.64 | 0.56 |
| YPAC-26 | BRAF    | 1.84 | 1.93 |
| YPAC-26 | BRCA1   | 1.98 | 2.05 |
| YPAC-26 | BRCA2   | 2.08 | 1.8  |
| YPAC-26 | CDH1    | 1.94 | 2.17 |
| YPAC-26 | CDK4    | 2    | 0.98 |
| YPAC-26 | CDK6    | 2.07 | 2.12 |
| YPAC-26 | CDKN2A  | 1.57 | 1.03 |
| YPAC-26 | CSF1R   | 1.78 | 2.25 |
| YPAC-26 | CTNNB1  | 2.02 | 2.01 |
| YPAC-26 | DDR2    | 2.18 | 2.21 |
| YPAC-26 | EGFR    | 2.2  | 2.13 |
| YPAC-26 | EPHB4   | 0    | 0    |
| YPAC-26 | ERBB2   | 1.98 | 2.05 |
| YPAC-26 | ERBB3   | 2    | 0.98 |
| YPAC-26 | ERBB4   | 2.1  | 2.31 |
| YPAC-26 | EWSR1   | 2.05 | 0.51 |
| YPAC-26 | EZH2    | 1.84 | 0    |
| YPAC-26 | FBXW7   | 2.03 | 2.07 |
| YPAC-26 | FGFR1   | 2.02 | 2.19 |
| YPAC-26 | FGFR2   | 1.97 | 1.88 |
| YPAC-26 | FGFR3   | 2.07 | 2.07 |

|         |         |      |      |
|---------|---------|------|------|
| YPAC-26 | FLT3    | 2.08 | 1.8  |
| YPAC-26 | GNA11   | 1.72 | 1.73 |
| YPAC-26 | GNAQ    | 1.99 | 1.5  |
| YPAC-26 | GNAS    | 2.4  | 3.23 |
| YPAC-26 | HNF1A   | 0    | 0.98 |
| YPAC-26 | HRAS    | 2.03 | 2.3  |
| YPAC-26 | IDH1    | 2.1  | 2.31 |
| YPAC-26 | IDH2    | 2.17 | 2.19 |
| YPAC-26 | IGF1R   | 2.17 | 2.19 |
| YPAC-26 | ITK     | 1.78 | 0    |
| YPAC-26 | JAK1    | 1.6  | 1.2  |
| YPAC-26 | JAK2    | 1.57 | 1.03 |
| YPAC-26 | JAK3    | 1.72 | 1.73 |
| YPAC-26 | KDR     | 2.07 | 2.07 |
| YPAC-26 | KIT     | 2.07 | 2.07 |
| YPAC-26 | KRAS    | 2.45 | 3.08 |
| YPAC-26 | MDM2    | 2    | 0.98 |
| YPAC-26 | MET     | 1.84 | 1.93 |
| YPAC-26 | MLH1    | 0    | 0    |
| YPAC-26 | MPL     | 1.38 | 1.14 |
| YPAC-26 | MTOR    | 1.38 | 1.14 |
| YPAC-26 | NF1     | 1.98 | 2.05 |
| YPAC-26 | NOTCH1  | 1.31 | 1.06 |
| YPAC-26 | NPM1    | 1.81 | 2.27 |
| YPAC-26 | NRAS    | 1.6  | 1.2  |
| YPAC-26 | NTRK1   | 2.18 | 2.21 |
| YPAC-26 | PDGFRA  | 2.07 | 2.07 |
| YPAC-26 | PDGFRB  | 1.78 | 2.25 |
| YPAC-26 | PIK3CA  | 2.07 | 2.09 |
| YPAC-26 | PIK3R1  | 1.78 | 1.3  |
| YPAC-26 | PTCH1   | 0    | 0    |
| YPAC-26 | PTCH2   | 0    | 0    |
| YPAC-26 | PTEN    | 1.97 | 1.88 |
| YPAC-26 | RB1     | 2.08 | 1.96 |
| YPAC-26 | RET     | 1.97 | 1.88 |
| YPAC-26 | ROS1    | 1.76 | 1.37 |
| YPAC-26 | SMAD4   | 1.64 | 0.56 |
| YPAC-26 | SMARCB1 | 0    | 0.51 |
| YPAC-26 | SMO     | 1.84 | 1.93 |
| YPAC-26 | SRC     | 2.4  | 3.23 |
| YPAC-26 | STK11   | 1.72 | 1.73 |
| YPAC-26 | SYK     | 1.99 | 1.5  |
| YPAC-26 | TMPRSS2 | 1.86 | 1.97 |

|         |      |      |      |
|---------|------|------|------|
| YPAC-26 | TOP1 | 2.4  | 3.23 |
| YPAC-26 | TP53 | 1.61 | 1.19 |
| YPAC-26 | VHL  | 2.18 | 2.2  |

---

Supplementary Table 6. Colony assay analysis

|                                | Large colony<br>(n=5) | Small colony<br>(n=8) |
|--------------------------------|-----------------------|-----------------------|
| Tumor size, cm, median (range) | 4 (2~14.9)            | 2.95 (1.2~7)          |
| Unresectable status, n (%)     | 5 (100%)              | 4 (50%)               |
| Metastasis, n (%)              | 3 (60%)               | 1 (12.5%)             |

\*Large colony, YPAC-2,5,26,35,46

\*Small colony, YPAC-10,15,16,23,25,29,30,34
